# Supplementary material for: Copper-catalyzed radical-mediated intermolecular cyanomonofluoroalkylation of alkenes and alkynes
Source: Royal Society of Chemistry journal article supplement (doi:10.1039/d3ob00289f), 2023-01-01
Supplement: d3ob00289f1.pdf [file d3ob00289f1.pdf]

## Supporting Information

### **Copper-catalyzed radical-mediated intermolecular cyanomonofluoroalkylation of alkenes and alkynes**

Xuhui Cui<sup>a</sup>, Xia Wang<sup>a</sup>, Yanlan Huang<sup>a</sup>, Qi Jiang<sup>a</sup>, Li Liu<sup>a</sup>, Yanzhao Wang<sup>a,b\*</sup>, Jingjing Wu<sup>a,b,c\*</sup> and Fanhong Wu<sup>a,b\*</sup>

## Table of Contents

|                                                                                                   |     |
|---------------------------------------------------------------------------------------------------|-----|
| 1. General Information.....                                                                       | S2  |
| 2. Preparation of $\alpha$ -iodine- $\alpha$ -monofluoroketones.....                              | S2  |
| 3. Optimization of the reaction conditions.....                                                   | S3  |
| 4. Preparation and characterization.....                                                          | S5  |
| 4.1 General procedure for the synthesis of <b>3aa-3na</b> .....                                   | S5  |
| 4.2 General procedure for the synthesis of <b>3ab-3am</b> .....                                   | S11 |
| 4.3 General procedure for the synthesis of <b>5a-5d</b> .....                                     | S18 |
| 5. Gram scale synthesis and synthetic application .....                                           | S20 |
| 6. Mechanism investigation.....                                                                   | S22 |
| 6.1 Trapping experiment with TEMPO free radical .....                                             | S22 |
| 6.2 Control experiment .....                                                                      | S23 |
| 7. References.....                                                                                | S24 |
| 8. $^1\text{H}$ NMR, $^{13}\text{C}$ NMR, $^{19}\text{F}$ NMR Spectra, HRMS and Noesy for 5a..... | S25 |

## 1. General Information

All reagents were commercially available and used without further purification unless indicated otherwise. Reagents were purchased at the highest commercial quality and used without further purification, unless otherwise stated. Reactions were monitored by thin layer chromatography (TLC) carried out on GF<sub>254</sub> plates (0.25mm layer thickness) using UV light as visualizing agent. Flash chromatography was performed with 200-300 mesh silica gels.

All NMR spectra were recorded on a Quantum-Ip<sup>plus</sup> NMR Spectrometer (resonance frequencies 400 MHz for <sup>1</sup>H, 100 MHz for <sup>13</sup>C and 376 MHz for <sup>19</sup>F) or Bruker Avance 500 (resonance frequencies 500 MHz for <sup>1</sup>H and 125 MHz for <sup>13</sup>C) equipped with a 5 mm inverse broadband probe head with z-gradients at 295.8 K with standard Bruker pulse programs. The samples were dissolved in 0.6 mL CDCl<sub>3</sub> (99.8%D.TMS). Chemical shifts were given in values of  $\delta$  H and  $\delta$  C referenced to residual solvent signals ( $\delta$  H 7.26 for <sup>1</sup>H,  $\delta$  C 77.0 for <sup>13</sup>C in CDCl<sub>3</sub>). Data are presented in the following space: chemical shift, multiplicity, coupling constant in hertz (Hz), and signal area integration in natural numbers. <sup>1</sup>H, <sup>13</sup>C and <sup>19</sup>F multiplicities are reported as follows: singlet (s), doublet (d), triplet (t), quartet (q), doublet of doublets (dd), triplet of doublets (td), multiplet (m). High resolution mass spectra (HRMS) were recorded on a Bruker solan X 70 FT-MS (samples was dissolved in CH<sub>3</sub>OH and the ion source was ESI).

## 2. Preparation of $\alpha$ -iodine- $\alpha$ -monofluoroketones

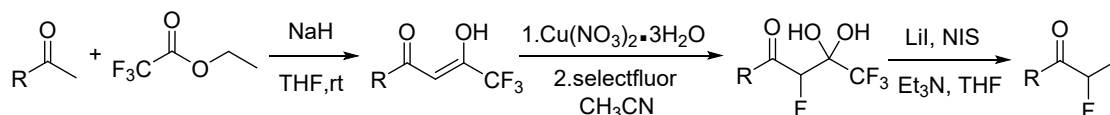

The  $\alpha$ -iodine- $\alpha$ -monofluoroketones **1a-1o** were prepared according to the reported procedure<sup>[1]</sup>. As shown above, the intermediates enols were obtained from the reaction of ethyl 2,2,2-trifluoroacetate and ketones. The enols reacted with Cu(NO<sub>3</sub>)<sub>2</sub>·3H<sub>2</sub>O and Selectfluor to form fluorinated gem-diols, which then reacted with NIS to afford  $\alpha$ -iodine- $\alpha$ -monofluoroketones **1a-1o** using the trifluoroacetate release conditions.

### 3. Optimization of the reaction conditions

**Table S1.** Screening of reaction conditions<sup>a</sup>

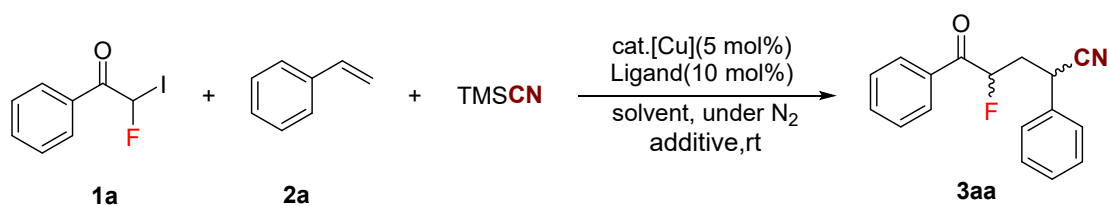

| Entry | Cat.                                                | Ligand | Additive | Sol.                            | Yield <sup>b</sup> [%] |
|-------|-----------------------------------------------------|--------|----------|---------------------------------|------------------------|
| 1     | Cu(OAc) <sub>2</sub>                                | L1     | LPO      | CH <sub>2</sub> Cl <sub>2</sub> | 88                     |
| 2     | CuTc                                                | L1     | LPO      | CH <sub>2</sub> Cl <sub>2</sub> | 85                     |
| 3     | CuCl                                                | L1     | LPO      | CH <sub>2</sub> Cl <sub>2</sub> | 60                     |
| 4     | CuBr                                                | L1     | LPO      | CH <sub>2</sub> Cl <sub>2</sub> | ND                     |
| 5     | CuI                                                 | L1     | LPO      | CH <sub>2</sub> Cl <sub>2</sub> | 62                     |
| 6     | CuF <sub>2</sub>                                    | L1     | LPO      | CH <sub>2</sub> Cl <sub>2</sub> | 70                     |
| 7     | CuAc                                                | L1     | LPO      | CH <sub>2</sub> Cl <sub>2</sub> | 79                     |
| 8     | Cu(CH <sub>3</sub> CN) <sub>4</sub> PF <sub>6</sub> | L1     | LPO      | CH <sub>2</sub> Cl <sub>2</sub> | 35                     |
| 9     | Cu(CF <sub>3</sub> SO <sub>3</sub> ) <sub>2</sub>   | L1     | LPO      | CH <sub>2</sub> Cl <sub>2</sub> | 30                     |
| 10    | Cu(CH <sub>3</sub> CN) <sub>4</sub> BF <sub>4</sub> | L1     | LPO      | CH <sub>2</sub> Cl <sub>2</sub> | 45                     |
| 11    | Cu(OAc) <sub>2</sub>                                | L1     | BPO      | CH <sub>2</sub> Cl <sub>2</sub> | 39                     |
| 12    | Cu(OAc) <sub>2</sub>                                | L1     | AIBN     | CH <sub>2</sub> Cl <sub>2</sub> | ND                     |
| 13    | Cu(OAc) <sub>2</sub>                                | L1     | TBPE     | CH <sub>2</sub> Cl <sub>2</sub> | ND                     |
| 14    | Cu(OAc) <sub>2</sub>                                | L1     | TBPB     | CH <sub>2</sub> Cl <sub>2</sub> | ND                     |
| 15    | Cu(OAc) <sub>2</sub>                                | L1     | TBHP     | CH <sub>2</sub> Cl <sub>2</sub> | 20                     |
| 16    | Cu(OAc) <sub>2</sub>                                | L1     | LPO      | CH <sub>3</sub> CN              | 64                     |
| 17    | Cu(OAc) <sub>2</sub>                                | L1     | LPO      | THF                             | 50                     |
| 18    | Cu(OAc) <sub>2</sub>                                | L1     | LPO      | DME                             | 48                     |

<sup>a</sup>The reactions were performed by using **1a** (0.2 mmol, 1.0 equiv), **2a** (0.24mmol, 1.2 equiv), TMS-CN (0.3 mmol, 1.5 equiv), initiator (0.3 mmol, 1.5 equiv), cat.[Cu] (5 mol%), ligand (10 mol%), solvent (2.0mL), 4 h, under N<sub>2</sub>. <sup>b</sup>Isolated yields. ND = not detected

**Table S2.** Optimization of the reaction conditions for alkynes<sup>a</sup>.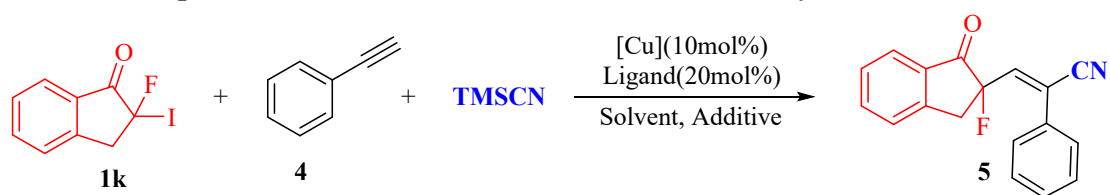

| Entry           | Cat.                                                | Ligand    | Additive   | Sol.                    | Yield <sup>b</sup> [%] |
|-----------------|-----------------------------------------------------|-----------|------------|-------------------------|------------------------|
| 1               | Cu(CH <sub>3</sub> CN) <sub>4</sub> PF <sub>6</sub> | L1        | LPO        | CH <sub>3</sub> OH      | 61                     |
| 2               | Cu(CH <sub>3</sub> CN) <sub>4</sub> PF <sub>6</sub> | L2        | LPO        | CH <sub>3</sub> OH      | 60                     |
| 3               | Cu(CH <sub>3</sub> CN) <sub>4</sub> PF <sub>6</sub> | L3        | LPO        | CH <sub>3</sub> OH      | 58                     |
| 4               | Cu(CH <sub>3</sub> CN) <sub>4</sub> PF <sub>6</sub> | L4        | LPO        | CH <sub>3</sub> OH      | 55                     |
| 5               | Cu(CH <sub>3</sub> CN) <sub>4</sub> PF <sub>6</sub> | L5        | LPO        | CH <sub>3</sub> OH      | 60                     |
| 6               | Cu(CH <sub>3</sub> CN) <sub>4</sub> PF <sub>6</sub> | L6        | LPO        | CH <sub>3</sub> OH      | 56                     |
| 7               | Cu(CH <sub>3</sub> CN) <sub>4</sub> PF <sub>6</sub> | L7        | LPO        | CH <sub>3</sub> OH      | 65                     |
| <b>8</b>        | <b>CuI</b>                                          | <b>L7</b> | <b>LPO</b> | <b>CH<sub>3</sub>OH</b> | <b>70</b>              |
| 9               | CuBr                                                | L7        | LPO        | CH <sub>3</sub> OH      | 63                     |
| 10              | Cu(OAc) <sub>2</sub>                                | L7        | LPO        | CH <sub>3</sub> OH      | 59                     |
| 11              | Cu(CH <sub>3</sub> CN) <sub>4</sub> BF <sub>4</sub> | L7        | LPO        | CH <sub>3</sub> OH      | 63                     |
| 12              | CuF <sub>2</sub>                                    | L7        | LPO        | CH <sub>3</sub> OH      | 59                     |
| 13              | CuI                                                 | L7        | BPO        | CH <sub>3</sub> OH      | 32                     |
| 14              | CuI                                                 | L7        | AIBN       | CH <sub>3</sub> OH      | 23                     |
| 15              | CuI                                                 | L7        | TBPE       | CH <sub>3</sub> OH      | 20                     |
| 16              | CuI                                                 | L7        | TBPB       | CH <sub>3</sub> OH      | trace                  |
| 17              | CuI                                                 | L7        | TBHP       | CH <sub>3</sub> OH      | trace                  |
| 18 <sup>c</sup> | CuI                                                 | L7        | LPO        | DCM                     | NR                     |
| 19              | CuI                                                 | L7        | LPO        | DMF                     | 45                     |
| 20              | CuI                                                 | L7        | LPO        | CH <sub>3</sub> CN      | 66                     |
| 21 <sup>d</sup> | -                                                   | L7        | LPO        | CH <sub>3</sub> OH      | trace                  |
| 22 <sup>e</sup> | CuI                                                 | -         | LPO        | CH <sub>3</sub> OH      | trace                  |
| 23 <sup>f</sup> | CuI                                                 | L7        | -          | CH <sub>3</sub> OH      | trace                  |

<sup>a</sup>The reactions were performed by using **1k** (0.3 mmol, 1.0 equiv), **4** (0.45 mmol, 1.5 equiv), TMSCN (0.6 mmol, 2.0 equiv), additive (0.75 mmol, 2.5 equiv), [Cu](10 mol%), ligand (20 mol%), solvent (1.5 mL), at 70°C, 5 h, under N<sub>2</sub>. <sup>b</sup>Isolated yields. <sup>c</sup>Room temperature. <sup>d</sup>Without CuI catalyst. <sup>e</sup>Without L7. <sup>f</sup>Without LPO. ND = not detected.

## 4. Preparation and characterization

### 4.1 General procedure for the synthesis of 3aa-3na

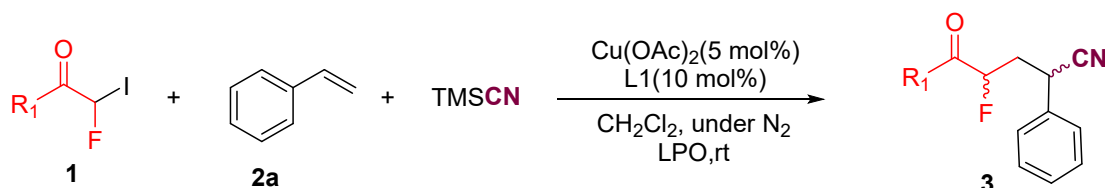

An oven-dried tube was charged with Copper(II) acetate (0.01 mmol, 5 mol %), Ligand 1 (0.02 mmol, 10 mol %), and LPO (0.3 mmol, 1.5 equiv). The tube was evacuated and backfilled with nitrogen (repeated three times). Then, α-iodo-α-fluoroacetophenone 1 (0.2 mmol, 1.0 equiv) dissolved in dichloromethane (2.0 mL), styrene 2a (0.24 mmol, 1.2 equiv), and TMSCN (0.3 mmol, 1.5 equiv) were added into the tube under the protection of nitrogen. The reaction mixture was stirring at room temperature for 4 h. After the reaction was completed, solvent was removed under reduced pressure by rotary evaporator, the crude residue was purified by silica-gel column chromatography (petroleum ether/EtOAc = 50:1) to afford the desired product 3aa-3na.

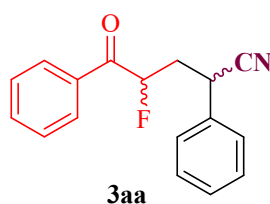

**4-fluoro-5-oxo-2,5-diphenylpentanenitrile**, purified by flash column chromatography on silica gel (PE/EA = 50/1), light yellow oily liquid, 47.1 mg, 88% yield. The compound is known<sup>[1c]</sup>.

<sup>1</sup>H NMR (400 MHz, CDCl<sub>3</sub>): δ 7.97 (d, *J* = 4.0 Hz, 2H), 7.79 (d, *J* = 8.0 Hz, 2H), 7.65-7.59 (m, 2H), 7.53-7.32 (m, 14H), 6.00-5.87 (m, 1H), 5.42-5.30 (m, 1H), 4.23-4.08 (m, 2H), 2.71-2.38 (m, 4H).

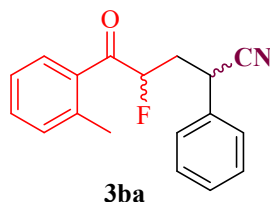

**4-fluoro-5-oxo-2-phenyl-5-(*o*-tolyl)pentanenitrile**, purified by flash column chromatography on silica gel (PE/EA = 50/1), light yellow oily liquid, 46.1 mg, 82% yield.

<sup>1</sup>H NMR (400 MHz, CDCl<sub>3</sub>): δ 7.66 (d, *J* = 8.0 Hz, 1H), 7.51-7.23 (m, 17H), 5.94-5.79 (m, 1H), 5.35-5.20 (m, 1H), 4.24-4.08 (m, 2H), 2.66-2.36 (m, 10H).

<sup>13</sup>C NMR (100 MHz, CDCl<sub>3</sub>): δ 198.63 (d, <sup>2</sup>*J*<sub>C-F</sub> = 20.0 Hz), 198.22 (d, <sup>2</sup>*J*<sub>C-F</sub> = 20.0 Hz), 139.48, 139.42, 134.45, 133.93, 133.75, 132.62, 132.51, 132.36, 132.33, 129.64,

129.50, 129.03, 128.99, 128.95, 128.81, 128.77, 128.71, 127.94, 127.30, 126.01, 125.75, 120.26, 119.59, 91.24 (d,  $^1J_{C-F} = 79.0\text{Hz}$ ), 89.39 (d,  $^1J_{C-F} = 79.0\text{Hz}$ ), 38.40 (d,  $^2J_{C-F} = 21.0\text{Hz}$ ), 37.47 (d,  $^2J_{C-F} = 21.0\text{Hz}$ ), 33.72 (d,  $^3J_{C-F} = 3.0\text{Hz}$ ), 33.16 (d,  $^3J_{C-F} = 4.0\text{Hz}$ ), 21.15, 21.09.

$^{19}\text{F}$  NMR (376 MHz,  $\text{CDCl}_3$ ):  $\delta$  -189.39--189.77 (m, 2F).

HRMS (ESI)  $m/z$   $[\text{M} + \text{Na}]^+$  calcd for  $\text{C}_{18}\text{H}_{16}\text{FNONa}^+$ : 304.1108; found: 304.1114.

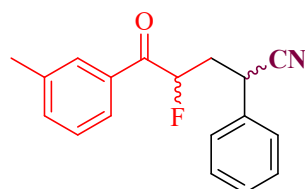

3ca

**4-fluoro-5-oxo-2-phenyl-5-(m-tolyl)pentanenitrile**, purified by flash column chromatography on silica gel (PE/EA = 50/1), light yellow oily liquid, 47.7 mg, 85% yield.

$^1\text{H}$  NMR (400 MHz,  $\text{CDCl}_3$ ):  $\delta$  7.75 (d,  $J = 8.0\text{Hz}$ , 2H),  $\delta$  7.56 (d,  $J = 8.0\text{Hz}$ , 2H), 7.49-7.30 (m, 14H), 6.00-5.84 (m, 1H), 5.44-5.29 (m, 1H), 4.23-4.06 (m, 2H), 2.70-2.31 (m, 10H).

$^{13}\text{C}$  NMR (100 MHz,  $\text{CDCl}_3$ ):  $\delta$  190.02 (d,  $^2J_{C-F} = 18.0\text{Hz}$ ), 189.80 (d,  $^2J_{C-F} = 18.0\text{Hz}$ ), 134.24, 134.07, 130.42, 130.33, 129.66, 129.17, 129.01, 128.95, 124.85, 124.67, 124.63, 124.60, 124.56, 124.22, 124.13, 124.00, 123.89, 123.15, 122.50, 121.38, 121.34, 121.30, 115.37, 114.89, 85.91 (d,  $^1J_{C-F} = 65.0\text{Hz}$ ), 84.07 (d,  $^1J_{C-F} = 66.0\text{Hz}$ ), 33.80 (d,  $^2J_{C-F} = 22.0\text{Hz}$ ), 33.00 (d,  $^2J_{C-F} = 21.0\text{Hz}$ ), 28.85 (d,  $^3J_{C-F} = 3.0\text{Hz}$ ), 28.37 (d,  $^3J_{C-F} = 3.0\text{Hz}$ ), 16.59, 16.55.

$^{19}\text{F}$  NMR (376 MHz,  $\text{CDCl}_3$ ):  $\delta$  -190.44--190.88 (m, 2F).

HRMS (ESI)  $m/z$   $[\text{M} + \text{Na}]^+$  calcd for  $\text{C}_{18}\text{H}_{16}\text{FNONa}^+$ : 304.1108, found: 304.1108.

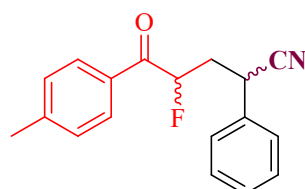

3da

**4-fluoro-5-oxo-2-phenyl-5-(p-tolyl)pentanenitrile**, purified by flash column chromatography on silica gel (PE/EA = 50/1), light yellow oily liquid, 46.7 mg, 83% yield.

$^1\text{H}$  NMR (400 MHz,  $\text{CDCl}_3$ ):  $\delta$  7.91 (d,  $J = 8.0\text{Hz}$ , 2H),  $\delta$  7.72 (d,  $J = 8.0\text{Hz}$ , 2H), 7.53-7.27 (m, 14H), 6.04-5.88 (m, 1H), 5.45-5.30 (m, 1H), 4.27-4.10 (m, 2H), 2.75-2.39 (m, 10H).

$^{13}\text{C}$  NMR (100 MHz,  $\text{CDCl}_3$ ):  $\delta$  189.43 (d,  $^2J_{C-F} = 19.0\text{Hz}$ ), 189.16 (d,  $^2J_{C-F} = 18.0\text{Hz}$ ), 140.77, 140.67, 129.73, 129.25, 126.49, 124.97, 124.84, 124.82, 124.67, 124.58, 124.45, 124.32, 124.29, 124.28, 124.18, 124.06, 123.87, 123.11, 122.50, 115.43, 114.94, 85.96 (d,  $^1J_{C-F} = 60.0\text{Hz}$ ), 84.13 (d,  $^1J_{C-F} = 60.0\text{Hz}$ ), 33.84 (d,  $^2J_{C-F} = 21.0\text{Hz}$ ), 32.98 (d,  $^2J_{C-F} = 21.0\text{Hz}$ ), 28.3 (d,  $^3J_{C-F} = 3.0\text{Hz}$ ), 28.35 (d,  $^3J_{C-F} = 4.0\text{Hz}$ ), 17.05, 17.02.

$^{19}\text{F}$  NMR (376 MHz,  $\text{CDCl}_3$ ):  $\delta$  -189.97--190.22 (m, 1F), -190.39--190.66 (m, 1F).

HRMS (ESI)  $m/z$   $[\text{M} + \text{Na}]^+$  calcd for  $\text{C}_{18}\text{H}_{16}\text{FNONa}^+$ : 304.1108; found: 304.1113.

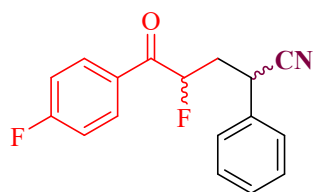

3ea

**5-(4-fluorophenyl)-4-fluoro-5-oxo-2-phenylpentanenitrile**, purified by flash column chromatography on silica gel (PE/EA = 50/1), light yellow oily liquid, 53.1 mg, 93% yield.

$^1\text{H}$  NMR (400 MHz,  $\text{CDCl}_3$ ):  $\delta$  8.06-8.01 (m, 2H), 7.91-7.87 (m, 2H), 7.49-7.36 (m, 10H), 7.21-7.11 (m, 4H), 5.97-5.81 (m, 1H), 5.43-5.28 (m, 1H), 4.26-4.10 (m, 2H), 2.70-2.43 (m, 4H).

$^{13}\text{C}$  NMR (100 MHz,  $\text{CDCl}_3$ ):  $\delta$  194.31 (d,  $^2J_{\text{C-F}} = 20.0\text{Hz}$ ), 192.00 (d,  $^2J_{\text{C-F}} = 19.0\text{Hz}$ ), 167.62 (d,  $J = 7.0\text{Hz}$ ), 165.06 (d,  $J = 7.0\text{Hz}$ ), 134.40, 133.95, 132.02, 131.98, 131.92, 131.88, 130.23, 130.21, 129.65, 129.49, 129.02, 128.73, 127.88, 127.32, 120.22, 119.72, 116.41, 116.29, 116.20, 116.08, 91.05 (d,  $^1J_{\text{C-F}} = 52.0\text{Hz}$ ), 89.22 (d,  $^1J_{\text{C-F}} = 52.0\text{Hz}$ ), 38.30 (d,  $^2J_{\text{C-F}} = 20.0\text{Hz}$ ), 37.50 (d,  $^2J_{\text{C-F}} = 21.0\text{Hz}$ ), 33.53, 33.08 (d,  $^3J_{\text{C-F}} = 4.0\text{Hz}$ ).

$^{19}\text{F}$  NMR (376 MHz,  $\text{CDCl}_3$ ):  $\delta$  -102.77--102.92 (m, 2F), -189.59--189.74 (m, 1F), -189.85--190.13 (m, 1F).

HRMS (ESI)  $m/z$   $[\text{M} + \text{Na}]^+$  calcd for  $\text{C}_{17}\text{H}_{13}\text{F}_2\text{NONa}^+$ : 308.0857; found: 308.0861.

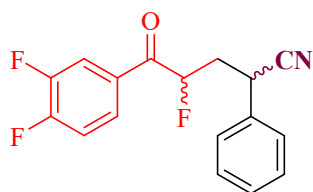

3fa

**5-(3,4-difluorophenyl)-4-fluoro-5-oxo-2-phenylpentanenitrile**, purified by flash column chromatography on silica gel (PE/EA = 50/1), light yellow oily liquid, 51.56 mg, 85% yield.

$^1\text{H}$  NMR (400 MHz,  $\text{CDCl}_3$ ):  $\delta$  7.76-7.56 (m, 4H), 7.41-7.12 (m, 12H), 5.78-5.64 (m, 1H), 5.28-5.11 (m, 1H), 4.14-3.98 (m, 2H), 2.62-2.34 (m, 4H).

$^{13}\text{C}$  NMR (100 MHz,  $\text{CDCl}_3$ ):  $\delta$  194.51 (d,  $^2J_{\text{C-F}} = 20.0\text{Hz}$ ), 192.22 (d,  $^2J_{\text{C-F}} = 20.0\text{Hz}$ ), 155.58, 152.99, 151.77, 149.40, 134.22, 133.79, 130.82, 129.62, 129.48, 129.28, 129.01, 128.74, 127.75, 127.25, 126.44, 126.36, 119.92, 119.46, 118.71, 118.52, 118.06, 117.97, 117.88, 117.79, 91.32 (d,  $^1J_{\text{C-F}} = 46.0\text{Hz}$ ), 89.48 (d,  $^1J_{\text{C-F}} = 48.0\text{Hz}$ ), 38.06 (d,  $^2J_{\text{C-F}} = 21.0\text{Hz}$ ), 37.38 (d,  $^2J_{\text{C-F}} = 21.0\text{Hz}$ ), 33.38 (d,  $^3J_{\text{C-F}} = 3.0\text{Hz}$ ), 33.02 (d,  $^3J_{\text{C-F}} = 4.0\text{Hz}$ ).

$^{19}\text{F}$  NMR (376 MHz,  $\text{CDCl}_3$ ):  $\delta$  -126.81--126.98 (m, 2F), -134.85--134.96 (m, 1F), -134.99--135.10 (m, 1F), -188.50--188.96 (m, 2F).

HRMS (ESI)  $m/z$   $[\text{M} + \text{Na}]^+$  calcd for  $\text{C}_{17}\text{H}_{12}\text{F}_3\text{NONa}^+$ : 326.0763; found: 326.0768.



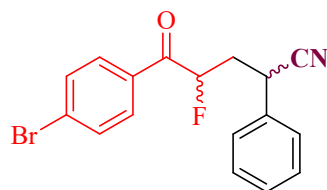

3ga

**5-(4-bromophenyl)-4-fluoro-5-oxo-2-phenylpentanenitrile**, purified by flash column chromatography on silica gel (PE/EA = 50/1), light yellow oily liquid, 61.41 mg, 89% yield.

$^1\text{H NMR}$  (400 MHz,  $\text{CDCl}_3$ ):  $\delta$  7.82 (d,  $J = 8.0\text{Hz}$ , 2H), 7.67-7.57 (m, 6H), 7.47-7.33 (m, 10H), 5.92-5.77 (m, 1H), 5.37-5.22 (m, 1H), 4.22-4.06 (m, 2H), 2.70-2.35 (m, 4H).

$^{13}\text{C NMR}$  (100 MHz,  $\text{CDCl}_3$ ):  $\delta$  194.04 (d,  $^2J_{\text{C-F}} = 19.0\text{Hz}$ ), 193.71 (d,  $^2J_{\text{C-F}} = 19.0\text{Hz}$ ), 134.29, 133.81, 132.42, 132.30, 130.57, 130.53, 129.86, 129.77, 129.70, 129.54, 129.09, 128.78, 127.90, 127.32, 120.18, 119.69, 91.03 (d,  $^1J_{\text{C-F}} = 53.0\text{Hz}$ ), 89.19 (d,  $^1J_{\text{C-F}} = 54.0\text{Hz}$ ), 38.30 (d,  $^2J_{\text{C-F}} = 21.0\text{Hz}$ ), 37.50 (d,  $^2J_{\text{C-F}} = 21.0\text{Hz}$ ), 33.53 (d,  $^3J_{\text{C-F}} = 2.0\text{Hz}$ ), 33.08 (d,  $^3J_{\text{C-F}} = 3.0\text{Hz}$ ).

$^{19}\text{F NMR}$  (376 MHz,  $\text{CDCl}_3$ ):  $\delta$  -189.43--189.94 (m, 2F).

**HRMS (ESI)**  $m/z$   $[\text{M} + \text{Na}]^+$  calcd for  $\text{C}_{17}\text{H}_{13}\text{BrFNONa}^+$ : 368.0056; found: 368.0059.

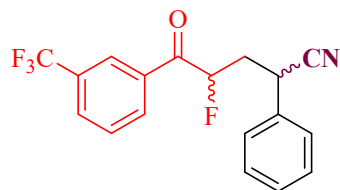

3ha

**4-fluoro-5-oxo-2-phenyl-5-(3-(trifluoromethyl)phenyl)pentanenitrile**, purified by flash column chromatography on silica gel (PE/EA = 50/1), light yellow oily liquid, 59.0 mg, 88% yield.

$^1\text{H NMR}$  (400 MHz,  $\text{CDCl}_3$ ):  $\delta$  8.22 (s, 1H), 8.15 (d,  $J = 8.0\text{Hz}$ , 1H), 8.06-8.02 (m, 2H), 7.87 (t,  $J = 8.0\text{Hz}$ , 2H), 7.67-7.59 (m, 2H), 7.48-7.34 (m, 10H), 5.93-5.77 (m, 1H), 5.42-5.27 (m, 1H), 4.23-4.08 (m, 2H), 2.74-2.41 (m, 4H).

$^{13}\text{C NMR}$  (100 MHz,  $\text{CDCl}_3$ ):  $\delta$  193.87 (d,  $^2J_{\text{C-F}} = 16.0\text{Hz}$ ), 193.65 (d,  $^2J_{\text{C-F}} = 16.0\text{Hz}$ ), 134.27, 134.13, 133.60, 132.23, 130.63, 129.70, 129.63, 129.50, 129.10, 128.78, 127.81, 127.28, 126.04, 124.40, 122.30, 120.00, 119.52, 91.08 (d,  $^1J_{\text{C-F}} = 66.0\text{Hz}$ ), 89.61 (d,  $^1J_{\text{C-F}} = 67.0\text{Hz}$ ), 38.03 (d,  $^2J_{\text{C-F}} = 17.0\text{Hz}$ ), 37.38 (d,  $^2J_{\text{C-F}} = 17.0\text{Hz}$ ), 33.39, 33.03.

$^{19}\text{F NMR}$  (376 MHz,  $\text{CDCl}_3$ ):  $\delta$  -62.90 (d,  $J = 7.52\text{Hz}$ , 6F), -189.28--189.53 (m, 1F), -189.80--190.06 (m, 1F).

**HRMS (ESI)**  $m/z$   $[\text{M} + \text{Na}]^+$  calcd for  $\text{C}_{18}\text{H}_{13}\text{F}_4\text{NONa}^+$ : 358.0825; found: 358.0829.

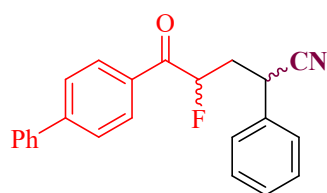

3ia

**5-([1,1'-biphenyl]-4-yl)-4-fluoro-5-oxo-2-phenylpentanenitrile**, purified by flash column chromatography on silica gel (PE/EA = 50/1), light yellow oily liquid, 51.51 mg, 75% yield.

**<sup>1</sup>H NMR** (500 MHz, CDCl<sub>3</sub>): δ 8.05 (d, *J* = 10.0 Hz, 2H), 7.87 (d, *J* = 10.0 Hz, 2H), 7.74-7.36 (m, 24H), 6.03-5.91 (m, 1H), 5.46-5.33 (m, 1H), 4.26-4.10 (m, 2H), 2.74-2.41 (m, 4H).

**<sup>13</sup>C NMR** (125 MHz, CDCl<sub>3</sub>): δ 194.27 (d, <sup>2</sup>*J*<sub>C-F</sub> = 20.0 Hz), 193.94 (d, <sup>2</sup>*J*<sub>C-F</sub> = 18.75 Hz), 147.05, 146.96, 139.43, 134.40, 133.91, 132.33, 129.63, 129.61, 129.58, 129.47, 129.10, 129.01, 128.66, 127.91, 127.61, 127.48, 127.34, 127.28, 120.21, 119.72, 90.67 (d, <sup>1</sup>*J*<sub>C-F</sub> = 75.0 Hz), 89.22 (d, <sup>1</sup>*J*<sub>C-F</sub> = 73.75 Hz), 38.58 (d, <sup>2</sup>*J*<sub>C-F</sub> = 21.25 Hz), 37.69 (d, <sup>2</sup>*J*<sub>C-F</sub> = 22.50 Hz), 33.62, 33.13.

**<sup>19</sup>F NMR** (376 MHz, CDCl<sub>3</sub>): δ -190.02 (s, 1F), -190.35 (s, 1F).

**HRMS (ESI)** *m/z* [M + Na]<sup>+</sup> calcd for C<sub>23</sub>H<sub>18</sub>FNONa<sup>+</sup>: 366.1264; found: 366.1261.

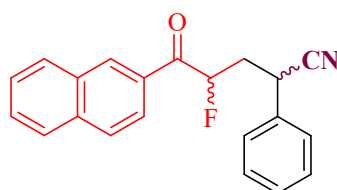

3ja

**4-fluoro-5-(naphthalen-2-yl)-5-oxo-2-phenylpentanenitrile**, purified by flash column chromatography on silica gel (PE/EA = 50/1), light yellow oily liquid, 38.1 mg, 60% yield.

**<sup>1</sup>H NMR** (400 MHz, CDCl<sub>3</sub>): δ 8.46 (d, *J* = 8.0 Hz, 2H), 8.04-7.33 (m, 22H), 6.04-5.89 (m, 1H), 5.47-5.32 (m, 1H), 4.21-4.04 (m, 2H), 2.73-2.37 (m, 4H).

**<sup>13</sup>C NMR** (100 MHz, CDCl<sub>3</sub>): δ 198.32 (d, <sup>2</sup>*J*<sub>C-F</sub> = 20.0 Hz), 197.90 (d, <sup>2</sup>*J*<sub>C-F</sub> = 20.0 Hz), 134.43, 134.09, 134.06, 134.03, 133.98, 133.84, 131.58, 130.57, 129.58, 129.43, 128.94, 128.83, 128.78, 128.72, 128.64, 128.59, 127.87, 127.25, 126.91, 125.23, 124.37, 124.14, 120.14, 119.53, 91.35 (d, <sup>1</sup>*J*<sub>C-F</sub> = 71.0 Hz), 89.49 (d, <sup>1</sup>*J*<sub>C-F</sub> = 71.0 Hz), 38.48 (d, <sup>2</sup>*J*<sub>C-F</sub> = 21.0 Hz), 37.63 (d, <sup>2</sup>*J*<sub>C-F</sub> = 21.0 Hz), 33.72 (d, <sup>3</sup>*J*<sub>C-F</sub> = 2.0 Hz), 33.24 (d, <sup>3</sup>*J*<sub>C-F</sub> = 3.0 Hz).

**<sup>19</sup>F NMR** (376 MHz, CDCl<sub>3</sub>): δ -187.94 (s, 1F), -188.18 (s, 1F).

**HRMS (ESI)** *m/z* [M + Na]<sup>+</sup> calcd for C<sub>21</sub>H<sub>16</sub>FNONa<sup>+</sup>: 340.1108; found: 340.1112.

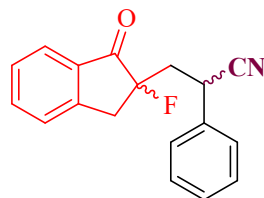

3ka

**3-(2-fluoro-1-oxo-2,3-dihydro-1H-inden-2-yl)-2-phenylpropanenitrile**, purified by flash column chromatography on silica gel (PE/EA = 50/1), light yellow oily liquid, 39.1 mg, 70% yield.

**<sup>1</sup>H NMR** (400 MHz, CDCl<sub>3</sub>): δ 7.81 (d, *J* = 8.0 Hz, 2H), 7.71-7.63 (m, 2H), 7.50-7.33 (m, 14H), 4.38-4.34 (m, 1H), 4.19 (t, *J* = 8.0 Hz, 1H), 3.76 (t, *J* = 20.0 Hz, 1H), 3.62-3.52 (m, 1H), 3.25-3.05 (m, 2H), 2.90-2.81 (m, 1H), 2.61-2.54 (m, 1H), 2.40-2.26 (m,

2H).

$^{13}\text{C}$  NMR (100 MHz,  $\text{CDCl}_3$ ):  $\delta$  199.36 (d,  $^2J_{\text{C-F}} = 15.0\text{Hz}$ ), 199.19 (d,  $^2J_{\text{C-F}} = 16.0\text{Hz}$ ), 150.53, 150.01, 136.93, 136.85, 135.60, 133.37, 133.24, 129.43, 128.72, 128.68, 128.63, 128.51, 127.74, 127.28, 126.96, 126.80, 125.44, 120.92, 120.50, 96.50 (d,  $^1J_{\text{C-F}} = 16.0\text{Hz}$ ), 94.64 (d,  $^1J_{\text{C-F}} = 15.0\text{Hz}$ ), 40.43 (d,  $^2J_{\text{C-F}} = 8.0\text{Hz}$ ), 40.49 (d,  $^2J_{\text{C-F}} = 10.0\text{Hz}$ ), 38.64 (d,  $^2J_{\text{C-F}} = 9.0\text{Hz}$ ), 38.40 (d,  $^2J_{\text{C-F}} = 10.0\text{Hz}$ ), 32.09 (d,  $^3J_{\text{C-F}} = 6.0\text{Hz}$ ), 31.40 (d,  $^3J_{\text{C-F}} = 5.0\text{Hz}$ ).

$^{19}\text{F}$  NMR (376 MHz,  $\text{CDCl}_3$ ):  $\delta$  -156.32--156.53 (m, 1F), -158.13--158.34 (m, 1F).

HRMS (ESI)  $m/z$   $[\text{M} + \text{Na}]^+$  calcd for  $\text{C}_{18}\text{H}_{14}\text{FNONa}^+$ : 302.0951; found: 302.0958.

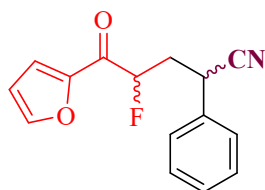

3la

**4-fluoro-5-(furan-2-yl)-5-oxo-2-phenylpentanenitrile**, purified by flash column chromatography on silica gel (PE/EA = 50/1), light yellow oily liquid, 37.1 mg, 72% yield.

$^1\text{H}$  NMR (400 MHz,  $\text{CDCl}_3$ ):  $\delta$  7.67(d,  $J = 16.0\text{Hz}$ , 2H), 7.45-7.32 (m, 12H), 6.61-6.57 (m, 2H), 5.71-5.55 (m, 1H), 5.18-5.02 (m, 1H), 4.19-4.05 (m, 2H), 2.69-2.33 (m, 4H).

$^{13}\text{C}$  NMR (100 MHz,  $\text{CDCl}_3$ ):  $\delta$  183.39 (d,  $^2J_{\text{C-F}} = 21.0\text{Hz}$ ), 183.14 (d,  $^2J_{\text{C-F}} = 20.0\text{Hz}$ ), 149.54, 148.24, 148.19, 134.33, 133.69, 129.59, 129.47, 128.99, 128.73, 127.89, 127.34, 121.61, 121.52, 121.47, 121.38, 120.18, 119.55, 112.93, 112.86, 91.35 (d,  $^1J_{\text{C-F}} = 50.0\text{Hz}$ ), 89.50 (d,  $^1J_{\text{C-F}} = 51.0\text{Hz}$ ), 38.52 (d,  $^2J_{\text{C-F}} = 21.0\text{Hz}$ ), 37.77 (d,  $^2J_{\text{C-F}} = 21.0\text{Hz}$ ), 33.47 (d,  $^3J_{\text{C-F}} = 3.0\text{Hz}$ ), 32.05 (d,  $^3J_{\text{C-F}} = 3.0\text{Hz}$ ).

$^{19}\text{F}$  NMR (376 MHz,  $\text{CDCl}_3$ ):  $\delta$  -192.88--193.23 (m, 2F).

HRMS (ESI)  $m/z$   $[\text{M} + \text{Na}]^+$  calcd for  $\text{C}_{15}\text{H}_{12}\text{FNO}_2\text{Na}^+$ : 280.0744; found: 280.0750.

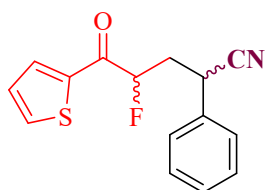

3ma

**4-fluoro-5-oxo-2-phenyl-5-(thiophen-2-yl)pentanenitrile**, purified by flash column chromatography on silica gel (PE/EA = 50/1), light yellow oily liquid, 42.6 mg, 78% yield.

$^1\text{H}$  NMR (400 MHz,  $\text{CDCl}_3$ ):  $\delta$  7.96(d,  $J = 4.0\text{Hz}$ , 1H), 7.82(d,  $J = 4.0\text{Hz}$ , 1H), 7.76 (t,  $J = 4.0\text{Hz}$ , 2H), 7.46-7.33 (m, 10H), 7.20-7.14 (m, 2H), 5.70-5.54 (m, 1H), 5.21-5.05 (m, 1H), 4.20-4.07 (m, 2H), 2.73-2.40 (m, 4H).

$^{13}\text{C}$  NMR (100 MHz,  $\text{CDCl}_3$ ):  $\delta$  188.25 (d,  $^2J_{\text{C-F}} = 22.0\text{Hz}$ ), 187.96 (d,  $^2J_{\text{C-F}} = 21.0\text{Hz}$ ), 139.96, 139.82, 136.01, 134.72, 134.63, 134.35, 133.82, 129.61, 129.48, 128.98, 128.79, 128.72, 128.69, 127.86, 127.36, 120.16, 119.61, 92.37 (d,  $^1J_{\text{C-F}} = 50.0\text{Hz}$ ), 90.51 (d,  $^1J_{\text{C-F}} = 50.0\text{Hz}$ ), 38.79 (d,  $^2J_{\text{C-F}} = 21.0\text{Hz}$ ), 38.10 (d,  $^2J_{\text{C-F}} = 21.0\text{Hz}$ ), 33.48 (d,  $^3J_{\text{C-F}} = 3.0\text{Hz}$ ), 33.13 (d,  $^3J_{\text{C-F}} = 3.0\text{Hz}$ ).

$^{19}\text{F}$  NMR (376 MHz,  $\text{CDCl}_3$ ):  $\delta$  -188.30--188.72 (m, 2F).

HRMS (ESI)  $m/z$   $[\text{M} + \text{Na}]^+$  calcd for  $\text{C}_{15}\text{H}_{12}\text{FNOSNa}^+$ : 296.0515; found: 296.0523.

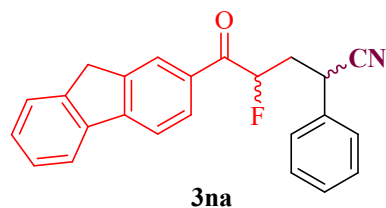

**5-(9H-fluoren-2-yl)-4-fluoro-5-oxo-2-phenylpentanenitrile**, purified by flash column chromatography on silica gel (PE/EA = 50/1), light yellow oily liquid, 35.5 mg, 50% yield.

$^1\text{H}$  NMR (500 MHz,  $\text{CDCl}_3$ ):  $\delta$  8.13(s, 1H), 8.00(d,  $J$  = 10.0Hz, 1H), 7.94(s, 1H), 7.87-7.82 (m, 3H), 7.79(s, 2H), 7.60-7.34 (m, 16H), 6.06-5.93 (m, 1H), 5.48-5.36 (m, 1H), 4.26-4.10 (m, 2H), 3.93(d,  $J$  = 25.0Hz, 4H), 2.75-2.42 (m, 4H).

$^{13}\text{C}$  NMR (125 MHz,  $\text{CDCl}_3$ ):  $\delta$  194.27 (d,  $^2J_{\text{C-F}}$  = 18.75Hz), 194.01 (d,  $^2J_{\text{C-F}}$  = 18.75Hz), 147.77, 147.67, 144.72, 144.67, 143.64, 143.50, 140.12, 134.44, 134.00, 131.88, 129.62, 129.45, 128.99, 128.65, 128.58, 128.36, 128.32, 128.28, 127.94, 127.28, 127.25, 125.61, 125.58, 125.37, 121.21, 121.18, 120.24, 120.11, 119.97, 119.77, 92.57 (d,  $^1J_{\text{C-F}}$  = 68.75Hz), 89.11 (d,  $^1J_{\text{C-F}}$  = 70.0Hz), 38.67 (d,  $^2J_{\text{C-F}}$  = 20.0Hz), 37.85 (d,  $^2J_{\text{C-F}}$  = 21.25Hz), 36.93, 36.88, 33.64, 33.17.

$^{19}\text{F}$  NMR (376 MHz,  $\text{CDCl}_3$ ):  $\delta$  -189.68 (s, 1F), -189.86 (s, 1F).

HRMS (ESI)  $m/z$   $[\text{M} + \text{Na}]^+$  calcd for  $\text{C}_{24}\text{H}_{18}\text{FNONa}^+$ : 378.1264; found: 378.1262.

## 4.2 General procedure for the synthesis of 3ab-3am

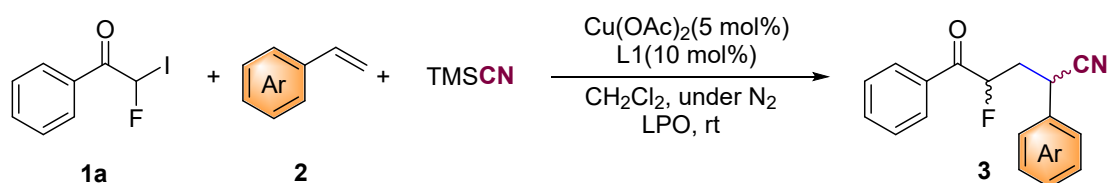

An oven-dried tube was charged with Copper(II) acetate (0.01 mmol, 5 mol %), Ligand **1** (0.02 mmol, 10 mol %), and LPO (0.3 mmol, 1.5 equiv). The tube was evacuated and backfilled with nitrogen (repeated three times). Then,  $\alpha$ -iodo- $\alpha$ -fluoroacetophenone **1a** (0.2 mmol, 1.0 equiv) dissolved in dichloromethane (2.0 mL), styrene **2** (0.24 mmol, 1.2 equiv), and TMSCN (0.3 mmol, 1.5 equiv) were added into the tube under the protection of nitrogen. The reaction mixture was stirring at room temperature for 4 h. After the reaction was completed, solvent was removed under reduced pressure by rotary evaporator, the crude residue was purified by silica-gel column chromatography (petroleum ether/EtOAc = 50:1) to afford the desired product **3ab-3am**.

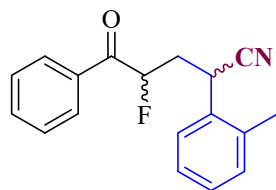

3ab

**4-fluoro-5-oxo-5-phenyl-2-(o-tolyl)pentanenitrile**, purified by flash column chromatography on silica gel (PE/EA = 50/1), light yellow oily liquid, 46.1 mg, 82% yield.

**<sup>1</sup>H NMR** (400 MHz, CDCl<sub>3</sub>): δ 8.01(d, *J* = 8.0Hz, 2H), 7.84(d, *J* = 8.0Hz, 2H), 7.70-7.23 (m, 14H), 6.60-5.95 (m, 1H), 5.50-5.35 (m, 1H), 4.44-4.32 (m, 2H), 2.73-2.26 (m, 10H).

**<sup>13</sup>C NMR** (100 MHz, CDCl<sub>3</sub>): δ 194.78 (d, <sup>2</sup>*J*<sub>C-F</sub> = 18.0Hz), 194.36 (d, <sup>2</sup>*J*<sub>C-F</sub> = 18.0Hz), 136.14, 135.11, 134.50, 134.41, 133.73, 133.67, 132.67, 132.30, 131.56, 131.37, 129.13, 129.03, 128.98, 128.94, 128.84, 128.79, 127.89, 127.40, 127.36, 127.21, 120.39, 120.08, 90.91 (d, <sup>1</sup>*J*<sub>C-F</sub> = 32.0Hz), 89.08 (d, <sup>1</sup>*J*<sub>C-F</sub> = 33.0Hz), 37.30 (d, <sup>2</sup>*J*<sub>C-F</sub> = 21.0Hz), 36.73 (d, <sup>2</sup>*J*<sub>C-F</sub> = 21.0Hz), 30.53 (d, <sup>3</sup>*J*<sub>C-F</sub> = 3.0Hz), 29.53 (d, <sup>3</sup>*J*<sub>C-F</sub> = 3.0Hz), 19.34, 18.99.

**<sup>19</sup>F NMR** (376 MHz, CDCl<sub>3</sub>): δ -187.95--188.21 (m, 1F), -190.85--191.12 (m, 1F).

**HRMS (ESI)** *m/z* [M + Na]<sup>+</sup> calcd for C<sub>18</sub>H<sub>16</sub>FNONa<sup>+</sup>: 304.1108; found: 304.1106.

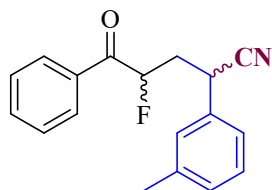

3ac

**4-fluoro-5-oxo-5-phenyl-2-(m-tolyl)pentanenitrile**, purified by flash column chromatography on silica gel (PE/EA = 50/1), light yellow oily liquid, 45.6 mg, 81% yield.

**<sup>1</sup>H NMR** (400 MHz, CDCl<sub>3</sub>): δ 8.00(d, *J* = 8.0Hz, 2H), 7.82(d, *J* = 8.0Hz, 2H), 7.69-7.61 (m, 2H), 7.57-7.18 (m, 12H), 6.05-5.89 (m, 1H), 5.48-5.32 (m, 1H), 4.23-4.06 (m, 2H), 2.74-2.35 (m, 10H).

**<sup>13</sup>C NMR** (100 MHz, CDCl<sub>3</sub>): δ 194.83 (d, <sup>2</sup>*J*<sub>C-F</sub> = 19.0Hz), 194.49 (d, <sup>2</sup>*J*<sub>C-F</sub> = 19.0Hz), 139.62, 139.40, 134.44, 134.35, 134.28, 133.74, 129.79, 129.49, 129.44, 129.35, 129.09, 129.01, 128.97, 128.94, 128.53, 127.95, 125.02, 124.34, 120.36, 119.84, 90.84 (d, <sup>1</sup>*J*<sub>C-F</sub> = 57.0Hz), 89.01 (d, <sup>1</sup>*J*<sub>C-F</sub> = 58.0Hz), 38.61 (d, <sup>2</sup>*J*<sub>C-F</sub> = 21.0Hz), 37.65 (d, <sup>2</sup>*J*<sub>C-F</sub> = 21.0Hz), 33.55 (d, <sup>3</sup>*J*<sub>C-F</sub> = 2.0Hz), 33.04 (d, <sup>3</sup>*J*<sub>C-F</sub> = 4.0Hz), 21.50, 21.43.

**<sup>19</sup>F NMR** (376 MHz, CDCl<sub>3</sub>): δ -190.18--190.79 (m, 2F).

**HRMS (ESI)** *m/z* [M + Na]<sup>+</sup> calcd for C<sub>18</sub>H<sub>16</sub>FNONa<sup>+</sup>: 304.1108; found: 304.1111.

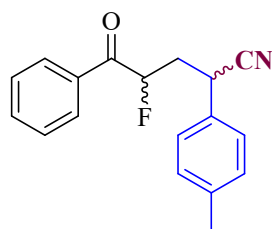

3ad

**4-fluoro-5-oxo-5-phenyl-2-(p-tolyl)pentanenitrile**, purified by flash column chromatography on silica gel (PE/EA = 50/1), light yellow oily liquid, 46.2 mg, 82% yield.

**<sup>1</sup>H NMR** (400 MHz, CDCl<sub>3</sub>): δ 7.99(d, *J* = 8.0Hz, 2H), 7.82(d, *J* = 8.0Hz, 2H), 7.68-7.61 (m, 2H), 7.56-7.46 (m, 4H), 7.36-7.21 (m, 8H), 6.04-5.88 (m, 1H), 5.47-5.31 (m, 1H), 4.23-4.07 (m, 2H), 2.72-2.35 (m, 10H).

**<sup>13</sup>C NMR** (100 MHz, CDCl<sub>3</sub>): δ 194.83 (d, <sup>2</sup>*J*<sub>C-F</sub> = 19.0Hz), 194.53 (d, <sup>2</sup>*J*<sub>C-F</sub> = 18.0Hz), 138.97, 138.61, 134.44, 134.34, 133.73, 131.37, 130.78, 130.30, 130.11, 129.08, 129.01, 128.97, 128.94, 127.83, 127.19, 120.44, 119.92, 90.83 (d, <sup>1</sup>*J*<sub>C-F</sub> = 65.0Hz), 89.00 (d, <sup>1</sup>*J*<sub>C-F</sub> = 65.0Hz), 38.58 (d, <sup>2</sup>*J*<sub>C-F</sub> = 21.0Hz), 37.65 (d, <sup>2</sup>*J*<sub>C-F</sub> = 21.0Hz), 33.25, 32.73, 21.25, 21.16.

**<sup>19</sup>F NMR** (376 MHz, CDCl<sub>3</sub>): δ -190.34--190.72 (m, 2F).

**HRMS (ESI)** *m/z* [M + Na]<sup>+</sup> calcd for C<sub>18</sub>H<sub>16</sub>FNONa<sup>+</sup>: 304.1108; found: 304.1105.

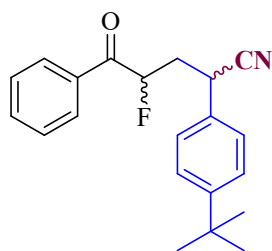

3ae

**2-(4-(tert-butyl)phenyl)-4-fluoro-5-oxo-5-phenylpentanenitrile**, purified by flash column chromatography on silica gel (PE/EA = 50/1), light yellow oily liquid, 41.4 mg, 64% yield.

**<sup>1</sup>H NMR** (400 MHz, CDCl<sub>3</sub>): δ 7.96(d, *J* = 8.0Hz, 2H), 7.78 (d, *J* = 8.0Hz, 2H), 7.65-7.30 (m, 14H), 6.03-5.88 (m, 1H), 5.47-5.31 (m, 1H), 4.23-4.06 (m, 2H), 2.70-2.36i (m, 4H), 1.35 (s, 9H), 1.31 (s, 9H).

**<sup>13</sup>C NMR** (100 MHz, CDCl<sub>3</sub>): δ 194.89 (d, <sup>2</sup>*J*<sub>C-F</sub> = 19.0Hz), 194.53 (d, <sup>2</sup>*J*<sub>C-F</sub> = 19.0Hz), 152.15, 151.82, 134.44, 134.34, 133.73, 131.35, 130.80, 129.09, 129.05, 129.01, 128.97, 128.93, 127.68, 127.05, 126.59, 126.42, 120.45, 119.91, 90.93 (d, <sup>1</sup>*J*<sub>C-F</sub> = 53.0Hz), 89.09 (d, <sup>1</sup>*J*<sub>C-F</sub> = 54.0Hz), 38.62 (d, <sup>2</sup>*J*<sub>C-F</sub> = 21.0Hz), 37.66 (d, <sup>2</sup>*J*<sub>C-F</sub> = 21.0Hz), 33.18 (d, <sup>3</sup>*J*<sub>C-F</sub> = 2.0Hz), 32.67 (d, <sup>3</sup>*J*<sub>C-F</sub> = 4.0Hz), 31.37, 31.33.

**<sup>19</sup>F NMR** (376 MHz, CDCl<sub>3</sub>): δ -190.22--190.48 (m, 1F), -190.74--191.00 (m, 1F).

**HRMS (ESI)** *m/z* [M + Na]<sup>+</sup> calcd for C<sub>21</sub>H<sub>22</sub>FNONa<sup>+</sup>: 346.1577; found: 346.1579.

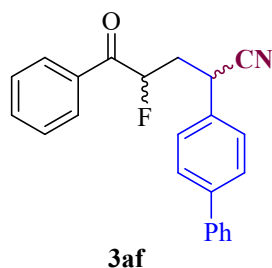

**2-([1,1'-biphenyl]-4-yl)-4-fluoro-5-oxo-5-phenylpentanenitrile**, purified by flash column chromatography on silica gel (PE/EA = 50/1), light yellow oily liquid, 48.1 mg, 70% yield.

**<sup>1</sup>H NMR** (400 MHz, CDCl<sub>3</sub>): δ 7.98(d, *J* = 8.0Hz, 2H), 7.83 (d, *J* = 4.0Hz, 2H), 7.73-7.36 (m, 24H), 6.06-5.90 (m, 1H), 5.50-5.35 (m, 1H), 4.30-4.12 (m, 2H), 2.77-2.41 (m, 4H).

**<sup>13</sup>C NMR** (100 MHz, CDCl<sub>3</sub>): δ 194.84 (d, <sup>2</sup>*J*<sub>C-F</sub> = 19.0Hz), 194.48 (d, <sup>2</sup>*J*<sub>C-F</sub> = 18.0Hz), 142.01, 141.74, 140.09, 140.03, 134.51, 134.42, 133.72, 133.27, 132.72, 129.13, 129.08, 129.03, 128.99, 128.91, 128.41, 128.32, 128.32, 128.24, 128.17, 127.97, 128.88, 127.79, 127.45, 127.22, 127.20, 127.11, 120.23, 119.74, 90.84 (d, <sup>1</sup>*J*<sub>C-F</sub> = 57.0Hz), 89.00 (d, <sup>1</sup>*J*<sub>C-F</sub> = 58.0Hz), 38.58 (d, <sup>2</sup>*J*<sub>C-F</sub> = 21.0Hz), 37.59 (d, <sup>2</sup>*J*<sub>C-F</sub> = 21.0Hz), 33.34 (d, <sup>3</sup>*J*<sub>C-F</sub> = 2.0Hz), 33.82 (d, <sup>3</sup>*J*<sub>C-F</sub> = 4.0Hz).

**<sup>19</sup>F NMR** (376 MHz, CDCl<sub>3</sub>): δ -189.95--190.21 (m, 1F), -190.47--190.73 (m, 1F).

**HRMS (ESI)** *m/z* [M + Na]<sup>+</sup> calcd for C<sub>23</sub>H<sub>18</sub>FNONa<sup>+</sup>: 366.1270; found: 366.1265.

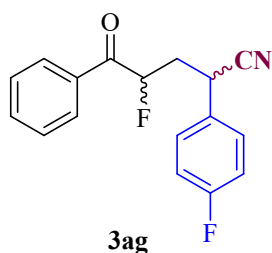

**4-fluoro-2-(4-fluorophenyl)-5-oxo-5-phenylpentanenitrile**, purified by flash column chromatography on silica gel (PE/EA = 50/1), light yellow oily liquid, 51.4 mg, 90% yield.

**<sup>1</sup>H NMR** (400 MHz, CDCl<sub>3</sub>): δ 7.93(d, *J* = 8.0Hz, 2H), 7.79 (d, *J* = 8.0Hz, 2H), 7.63-7.56 (m, 2H), 7.50-7.32 (m, 8H), 7.15-7.03 (m, 4H), 5.99-5.83 (m, 1H), 5.44-5.28 (m, 1H), 4.22-4.07 (m, 2H), 2.68-2.32 (m, 4H).

**<sup>13</sup>C NMR** (100 MHz, CDCl<sub>3</sub>): δ 194.71 (d, <sup>2</sup>*J*<sub>C-F</sub> = 19.0Hz), 194.39 (d, <sup>2</sup>*J*<sub>C-F</sub> = 18.0Hz), 163.98 (d, <sup>1</sup>*J*<sub>C-F</sub> = 18.0Hz), 161.51 (d, <sup>1</sup>*J*<sub>C-F</sub> = 18.0Hz), 134.51, 134.43, 133.71, 133.67, 130.32, 130.29, 129.83, 129.79, 129.71, 129.23, 129.14, 129.10, 129.02, 128.98, 120.11, 119.64, 116.77, 116.57, 116.35, 90.75 (d, <sup>1</sup>*J*<sub>C-F</sub> = 57.0Hz), 88.91 (d, <sup>1</sup>*J*<sub>C-F</sub> = 58.0Hz), 38.41 (d, <sup>2</sup>*J*<sub>C-F</sub> = 21.0Hz), 37.49 (d, <sup>2</sup>*J*<sub>C-F</sub> = 21.0Hz), 32.85 (d, <sup>3</sup>*J*<sub>C-F</sub> = 3.0Hz), 32.40 (d, <sup>3</sup>*J*<sub>C-F</sub> = 4.0Hz).

**<sup>19</sup>F NMR** (376 MHz, CDCl<sub>3</sub>): δ -112.28--112.35 (m, 1F), -112.79--112.86 (m, 1F), -189.80--190.05 (m, 1F), -190.37--190.63 (m, 1F).

**HRMS (ESI)** *m/z* [M + Na]<sup>+</sup> calcd for C<sub>17</sub>H<sub>13</sub>F<sub>2</sub>NONa<sup>+</sup>: 308.0857; found: 308.0859.

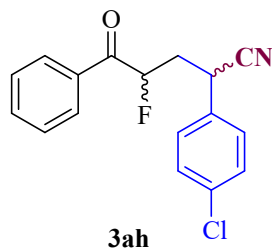

**2-(4-chlorophenyl)-4-fluoro-5-oxo-5-phenylpentanenitrile**, purified by flash column chromatography on silica gel (PE/EA = 50/1), light yellow oily liquid, 53.7 mg, 89% yield.

**<sup>1</sup>H NMR** (400 MHz, CDCl<sub>3</sub>): δ 7.94 (d, *J* = 8.0Hz, 2H), 7.81 (d, *J* = 8.0Hz, 2H), 7.65-7.59 (m, 2H), 7.52-7.29 (m, 12H), 5.99-5.83 (m, 1H), 5.44-5.28 (m, 1H), 4.21-4.06 (m, 2H), 2.70-2.33 (m, 4H).

**<sup>13</sup>C NMR** (100 MHz, CDCl<sub>3</sub>): δ 194.64 (d, <sup>2</sup>*J*<sub>C-F</sub> = 19.0Hz), 194.32 (d, <sup>2</sup>*J*<sub>C-F</sub> = 18.0Hz), 135.04, 134.74, 134.54, 134.46, 133.71, 133.66, 132.92, 132.46, 129.84, 129.67, 129.29, 129.11, 129.07, 129.03, 129.00, 128.75, 119.81, 119.36, 90.71 (d, <sup>1</sup>*J*<sub>C-F</sub> = 54.0Hz), 88.88 (d, <sup>1</sup>*J*<sub>C-F</sub> = 54.0Hz), 38.30 (d, <sup>2</sup>*J*<sub>C-F</sub> = 21.0Hz), 37.35 (d, <sup>2</sup>*J*<sub>C-F</sub> = 21.0Hz), 33.03, 32.56.

**<sup>19</sup>F NMR** (376 MHz, CDCl<sub>3</sub>): δ -189.21--189.46 (m, 1F), -190.10--190.36 (m, 1F).

**HRMS (ESI)** *m/z* [M + Na]<sup>+</sup> calcd for C<sub>17</sub>H<sub>13</sub>FNOCINa<sup>+</sup>: 324.0561; found: 324.0564.

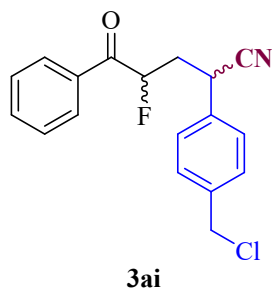

**2-(4-(chloromethyl)phenyl)-4-fluoro-5-oxo-5-phenylpentanenitrile**, purified by flash column chromatography on silica gel (PE/EA = 50/1), white solid, mp = 49-52 ° C, 54.9 mg, 87% yield.

**<sup>1</sup>H NMR** (400 MHz, CDCl<sub>3</sub>): δ 7.95 (d, *J* = 8.0Hz, 2H), 7.80 (d, *J* = 8.0Hz, 2H), 7.65-7.36 (m, 14H), 7.52-7.29 (m, 12H), 6.00-5.84 (m, 1H), 5.45-5.30 (m, 1H), 4.61 (s, 2H), 4.57 (s, 2H), 4.24-4.08 (m, 2H), 2.71-2.32 (m, 4H).

**<sup>13</sup>C NMR** (100 MHz, CDCl<sub>3</sub>): δ 193.61 (d, <sup>2</sup>*J*<sub>C-F</sub> = 19.0Hz), 193.29 (d, <sup>2</sup>*J*<sub>C-F</sub> = 19.0Hz), 137.36, 137.08, 133.51, 133.35, 133.27, 133.07, 132.70, 132.67, 128.69, 128.56, 127.98, 127.96, 127.92, 127.89, 127.86, 127.20, 126.66, 118.83, 118.37, 89.72 (d, <sup>1</sup>*J*<sub>C-F</sub> = 52.0Hz), 87.88 (d, <sup>1</sup>*J*<sub>C-F</sub> = 53.0Hz), 44.34, 37.26 (d, <sup>2</sup>*J*<sub>C-F</sub> = 21.0Hz), 36.37 (d, <sup>2</sup>*J*<sub>C-F</sub> = 21.0Hz), 32.20 (d, <sup>3</sup>*J*<sub>C-F</sub> = 3.0Hz), 31.75 (d, <sup>3</sup>*J*<sub>C-F</sub> = 4.0Hz).

**<sup>19</sup>F NMR** (376 MHz, CDCl<sub>3</sub>): δ -189.60 (s, 1F), -190.41 (s, 1F).

**HRMS (ESI)** *m/z* [M + Na]<sup>+</sup> calcd for C<sub>18</sub>H<sub>15</sub>ClFNONa<sup>+</sup>: 338.0718; found: 338.0721.



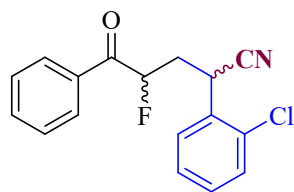

3aj

**2-(2-chlorophenyl)-4-fluoro-5-oxo-5-phenylpentanenitrile**, purified by flash column chromatography on silica gel (PE/EA = 50/1), light yellow oily liquid, 48.3 mg, 80% yield.

**<sup>1</sup>H NMR** (400 MHz, CDCl<sub>3</sub>): δ 7.98 (d, *J* = 8.0Hz, 2H), 7.89 (d, *J* = 8.0Hz, 2H), 7.65-7.29 (m, 14H), 5.99-5.83 (m, 1H), 5.62-5.47 (m, 1H), 4.70-4.58 (m, 2H), 2.74-2.32 (m, 4H).

**<sup>13</sup>C NMR** (100 MHz, CDCl<sub>3</sub>): δ 194.70 (d, <sup>2</sup>*J*<sub>C-F</sub> = 20.0Hz), 194.36 (d, <sup>2</sup>*J*<sub>C-F</sub> = 19.0Hz), 134.40, 134.33, 133.85, 133.77, 133.21, 132.76, 132.14, 130.50, 130.41, 130.34, 130.21, 129.54, 129.14, 129.11, 129.07, 129.04, 128.93, 128.07, 127.98, 119.32, 119.10, 91.28 (d, <sup>1</sup>*J*<sub>C-F</sub> = 9.0Hz), 89.44 (d, <sup>1</sup>*J*<sub>C-F</sub> = 8.0Hz), 36.38 (d, <sup>2</sup>*J*<sub>C-F</sub> = 21.0Hz), 36.05 (d, <sup>2</sup>*J*<sub>C-F</sub> = 21.0Hz), 31.28 (d, <sup>3</sup>*J*<sub>C-F</sub> = 3.0Hz), 30.93 (d, <sup>3</sup>*J*<sub>C-F</sub> = 4.0Hz).

**<sup>19</sup>F NMR** (376 MHz, CDCl<sub>3</sub>): δ -187.16--187.42 (m, 1F), -190.52--190.78 (m, 1F)..

**HRMS (ESI)** *m/z* [M + Na]<sup>+</sup> calcd for C<sub>17</sub>H<sub>13</sub>ClFNONa<sup>+</sup>: 324.0561; found: 324.0564.

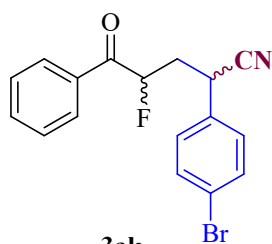

3ak

**2-(4-bromophenyl)-4-fluoro-5-oxo-5-phenylpentanenitrile**, purified by flash column chromatography on silica gel (PE/EA = 50/1), light yellow oily liquid, 57.5 mg, 83% yield.

**<sup>1</sup>H NMR** (400 MHz, CDCl<sub>3</sub>): δ 7.99 (d, *J* = 8.0Hz, 2H), 7.86 (d, *J* = 8.0Hz, 2H), 7.70-7.28 (m, 14H), 6.02-5.87 (m, 1H), 5.47-5.32 (m, 1H), 4.23-4.09 (m, 2H), 2.74-2.37 (m, 4H).

**<sup>13</sup>C NMR** (100 MHz, CDCl<sub>3</sub>): δ 194.64 (d, <sup>2</sup>*J*<sub>C-F</sub> = 19.0Hz), 194.30 (d, <sup>2</sup>*J*<sub>C-F</sub> = 19.0Hz), 134.55, 134.47, 133.71, 133.65, 133.41, 132.94, 132.82, 132.65, 129.56, 129.11, 129.08, 129.03, 129.00, 123.18, 122.85, 119.70, 119.25, 90.69 (d, <sup>1</sup>*J*<sub>C-F</sub> = 52.0Hz), 88.86 (d, <sup>1</sup>*J*<sub>C-F</sub> = 53.0Hz), 38.28 (d, <sup>2</sup>*J*<sub>C-F</sub> = 21.0Hz), 37.30 (d, <sup>2</sup>*J*<sub>C-F</sub> = 21.0Hz), 33.13, 32.65.

**<sup>19</sup>F NMR** (376 MHz, CDCl<sub>3</sub>): δ -189.14--189.39 (m, 1F), -190.10--190.36 (m, 1F)..

**HRMS (ESI)** *m/z* [M + Na]<sup>+</sup> calcd for C<sub>17</sub>H<sub>13</sub>BrFNONa<sup>+</sup>: 368.0056; found: 368.0055.

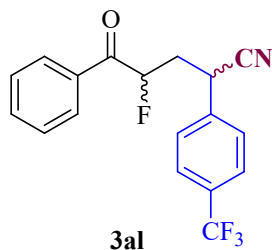

**4-fluoro-5-oxo-5-phenyl-2-(4-(trifluoromethyl)phenyl)pentanenitrile**, purified by flash column chromatography on silica gel (PE/EA = 50/1), light yellow oily liquid, 52.3 mg, 78% yield.

**<sup>1</sup>H NMR** (400 MHz, CDCl<sub>3</sub>): δ 7.96 (d, *J* = 8.0Hz, 2H), 7.84 (d, *J* = 8.0Hz, 2H), 7.73-7.45 (m, 14H), 6.01-5.86 (m, 1H), 5.45-5.32 (m, 1H), 4.31-4.17 (m, 2H), 2.76-2.52 (m, 4H).

**<sup>13</sup>C NMR** (100 MHz, CDCl<sub>3</sub>): δ 194.58 (d, <sup>2</sup>*J*<sub>C-F</sub> = 19.0Hz), 194.20 (d, <sup>2</sup>*J*<sub>C-F</sub> = 19.0Hz), 138.38, 138.02, 134.59, 134.52, 133.71, 133.64, 131.26, 129.12, 129.08, 129.04, 129.00, 128.39, 127.89, 126.65, 126.62, 126.53, 126.49, 125.10, 122.39, 119.44, 119.01, 90.69 (d, <sup>1</sup>*J*<sub>C-F</sub> = 42.0Hz), 88.85 (d, <sup>1</sup>*J*<sub>C-F</sub> = 43.0Hz), 38.23 (d, <sup>2</sup>*J*<sub>C-F</sub> = 21.0Hz), 37.22 (d, <sup>2</sup>*J*<sub>C-F</sub> = 21.0Hz), 33.42, 32.98.

**<sup>19</sup>F NMR** (376 MHz, CDCl<sub>3</sub>): δ -62.43--63.28 (m, 6F), -188.62--188.87 (m, 1F), -190.15--190.41 (m, 1F).

**HRMS (ESI)** *m/z* [M + Na]<sup>+</sup> calcd for C<sub>18</sub>H<sub>13</sub>F<sub>4</sub>NONa<sup>+</sup>: 358.0825; found: 358.0824.

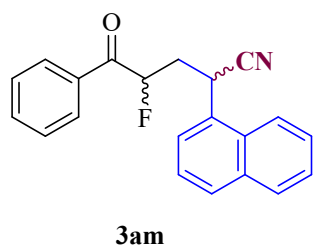

**4-fluoro-2-(naphthalen-1-yl)-5-oxo-5-phenylpentanenitrile**, purified by flash column chromatography on silica gel (PE/EA = 50/1), light yellow oily liquid, 38.1 mg, 60% yield.

**<sup>1</sup>H NMR** (400 MHz, CDCl<sub>3</sub>): δ 8.00-7.80 (m, 12H), 7.68-7.43 (m, 12H), 6.07-5.92 (m, 1H), 5.50-5.35 (m, 1H), 4.44-4.28 (m, 2H), 2.79-2.54 (m, 4H).

**<sup>13</sup>C NMR** (100 MHz, CDCl<sub>3</sub>): δ 194.77 (d, <sup>2</sup>*J*<sub>C-F</sub> = 19.0Hz), 194.49 (d, <sup>2</sup>*J*<sub>C-F</sub> = 19.0Hz), 134.41, 134.40, 133.78, 133.40, 133.37, 133.23, 133.04, 131.60, 131.08, 129.79, 129.55, 129.05, 129.02, 128.98, 128.90, 128.03, 127.96, 127.93, 127.84, 127.50, 127.14, 127.06, 127.02, 126.89, 126.57, 124.75, 124.54, 120.20, 119.74, 90.86 (d, <sup>1</sup>*J*<sub>C-F</sub> = 60.0Hz), 89.03 (d, <sup>1</sup>*J*<sub>C-F</sub> = 60.0Hz), 38.40 (d, <sup>2</sup>*J*<sub>C-F</sub> = 21.0Hz), 37.51 (d, <sup>2</sup>*J*<sub>C-F</sub> = 21.0Hz), 33.75 (d, <sup>3</sup>*J*<sub>C-F</sub> = 3.0Hz), 33.30 (d, <sup>3</sup>*J*<sub>C-F</sub> = 4.0Hz).

**<sup>19</sup>F NMR** (376 MHz, CDCl<sub>3</sub>): δ -189.91--190.48 (m, 2F).

**HRMS (ESI)** *m/z* [M + Na]<sup>+</sup> calcd for C<sub>21</sub>H<sub>16</sub>FNONa<sup>+</sup>: 340.1108; found: 340.1112.

### 4.3 General procedure for the synthesis of 5a-5d

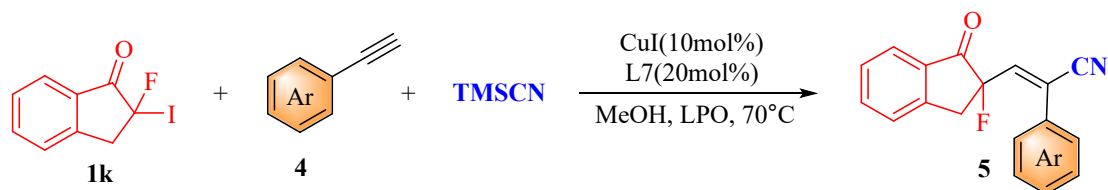

An oven-dried tube was charged with CuI (0.03 mmol, 10 mol %), Ligand **7** (0.06 mmol, 20 mol %), and LPO (0.75 mmol, 2.5 equiv). The tube was evacuated and backfilled with nitrogen (repeated three times). Then, α-iodo-α-fluoroacetophenone **1k** (0.3 mmol, 1.0 equiv) dissolved in methanol (2.0 mL), styrene **4a** (0.45 mmol, 1.5 equiv), and TMSCN (0.6 mmol, 2.0 equiv) were added into the tube under the protection of nitrogen. The reaction mixture was stirring at 70 °C for 5 h. After the reaction was completed, solvent was removed under reduced pressure by rotary evaporator, the crude residue was purified by silica-gel column chromatography (petroleum ether/EtOAc = 30:1) to afford the desired product **5a-5d**.

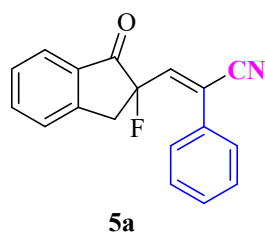

**(E)-3-(2-fluoro-1-oxo-2,3-dihydro-1H-inden-2-yl)-2-phenylacrylonitrile**, purified by flash column chromatography on silica gel (PE/EA = 30/1), light yellow oily liquid, 58.2 mg, 70% yield.

<sup>1</sup>H NMR (400 MHz, CDCl<sub>3</sub>): δ 7.73(d, *J* = 8.0 Hz, 1H), 7.64(t, *J* = 4.0 Hz, 1H), 7.43-7.25 (m, 7H), 6.69(d, *J* = 20.0 Hz, 1H), 3.38(d, *J* = 16.0 Hz, 2H).

<sup>13</sup>C NMR (100 MHz, CDCl<sub>3</sub>): δ 196.82 (d, <sup>2</sup>*J*<sub>C-F</sub> = 18.0 Hz), 149.49, 149.46, 141.90, 141.64, 136.91, 133.14, 131.39, 129.90, 128.83, 128.80, 128.76, 128.46, 126.65, 125.62, 120.35, 120.27, 118.41, 96.05 (d, <sup>1</sup>*J*<sub>C-F</sub> = 187.0 Hz), 40.11 (d, <sup>2</sup>*J*<sub>C-F</sub> = 25.0 Hz).

<sup>19</sup>F NMR (376 MHz, CDCl<sub>3</sub>): δ -147.50 (s, 1F).

HRMS (ESI) *m/z* [M + Na]<sup>+</sup> calcd for C<sub>18</sub>H<sub>12</sub>FNONa<sup>+</sup>: 300.0795; found: 300.0798.

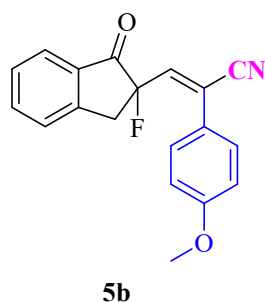

**(E)-3-(2-fluoro-1-oxo-2,3-dihydro-1H-inden-2-yl)-2-(4-methoxyphenyl)acrylonitrile**, purified by flash column chromatography on silica gel (PE/EA = 30/1), light yellow oily liquid, 59.9 mg, 65% yield.

<sup>1</sup>H NMR (500 MHz, CDCl<sub>3</sub>): δ 7.75(d, *J* = 10.0 Hz, 1H), 7.64(t, *J* = 10.0 Hz, 1H), 7.43-

7.33 (m, 4H), 6.79(d,  $J = 10.0\text{Hz}$ , 2H), 6.61(d,  $J = 20.0\text{Hz}$ , 1H), 3.78(s, 3H), 3.41-7.36 (m, 2H).

$^{13}\text{C}$  NMR (125 MHz,  $\text{CDCl}_3$ ):  $\delta$  197.13 (d,  $^2J_{\text{C-F}} = 20.0\text{Hz}$ ), 160.85, 149.63, 140.22, 140.02, 136.91, 133.17, 130.46, 130.43, 128.73, 126.70, 125.62, 123.61, 120.49, 120.44, 118.68, 113.87, 95.86 (d,  $^1J_{\text{C-F}} = 186.25\text{Hz}$ ), 55.36, 40.05(d,  $^2J_{\text{C-F}} = 23.75\text{Hz}$ ).

$^{19}\text{F}$  NMR (376 MHz,  $\text{CDCl}_3$ ):  $\delta$  -146.49 (s, 1F).

HRMS (ESI)  $m/z$   $[\text{M} + \text{Na}]^+$  calcd for  $\text{C}_{19}\text{H}_{14}\text{FNO}_2\text{Na}^+$ : 330.0900; found: 330.0901.

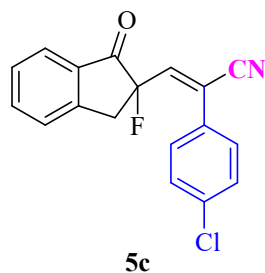

**(E)-2-(4-chlorophenyl)-3-(2-fluoro-1-oxo-2,3-dihydro-1H-inden-2-yl)acrylonitrile**, purified by flash column chromatography on silica gel (PE/EA = 30/1), light yellow oily liquid, 66.4mg, 71% yield.

$^1\text{H}$  NMR (500 MHz,  $\text{CDCl}_3$ ):  $\delta$  7.77(d,  $J = 5.0\text{Hz}$ , 1H), 7.70(t,  $J = 5.0\text{Hz}$ , 1H), 7.48-7.28 (m, 6H), 6.61(d,  $J = 20.0\text{Hz}$ , 1H), 3.47-3.43 (m, 2H).

$^{13}\text{C}$  NMR (125 MHz,  $\text{CDCl}_3$ ):  $\delta$  196.54 (d,  $^2J_{\text{C-F}} = 17.5\text{Hz}$ ), 149.29, 149.26, 142.00, 141.81, 137.20, 136.11, 133.06, 130.35, 130.32, 129.77, 128.97, 128.64, 126.79, 125.73, 119.00, 118.95, 118.20, 96.18 (d,  $^1J_{\text{C-F}} = 191.25\text{Hz}$ ), 40.26(d,  $^2J_{\text{C-F}} = 23.75\text{Hz}$ ).

$^{19}\text{F}$  NMR (376 MHz,  $\text{CDCl}_3$ ):  $\delta$  -151.12 (s, 1F).

HRMS (ESI)  $m/z$   $[\text{M} + \text{Na}]^+$  calcd for  $\text{C}_{18}\text{H}_{11}\text{ClFNONa}^+$ : 334.0405; found: 334.0407.

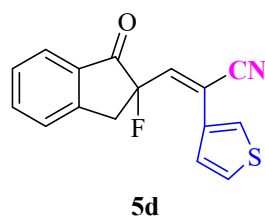

**(E)-3-(2-fluoro-1-oxo-2,3-dihydro-1H-inden-2-yl)-2-(thiophen-3-yl)acrylonitrile**, purified by flash column chromatography on silica gel (PE/EA = 30/1), light yellow oily liquid, 63.5 mg, 75% yield.

$^1\text{H}$  NMR (500 MHz,  $\text{CDCl}_3$ ):  $\delta$  7.79(d,  $J = 5.0\text{Hz}$ , 1H), 7.68(t,  $J = 5.0\text{Hz}$ , 1H), 7.61(s, 1H), 7.47-7.28 (m, 4H), 6.53(d,  $J = 20.0\text{Hz}$ , 1H), 3.54-7.41 (m, 2H).

$^{13}\text{C}$  NMR (125 MHz,  $\text{CDCl}_3$ ):  $\delta$  196.92 (d,  $^2J_{\text{C-F}} = 18.75\text{Hz}$ ), 149.43, 149.40, 140.05, 139.86, 137.10, 133.12, 131.33, 128.93, 128.05, 128.01, 126.81, 126.42, 125.72, 118.30, 115.61, 115.56, 96.15 (d,  $^1J_{\text{C-F}} = 190.0\text{Hz}$ ), 40.19(d,  $^2J_{\text{C-F}} = 25.0\text{Hz}$ ).

$^{19}\text{F}$  NMR (376 MHz,  $\text{CDCl}_3$ ):  $\delta$  -150.18 (s, 1F).

HRMS (ESI)  $m/z$   $[\text{M} + \text{Na}]^+$  calcd for  $\text{C}_{16}\text{H}_{10}\text{FNOSNa}^+$ : 306.0359; found: 306.0366.

## 5. Gram scale synthesis and synthetic application

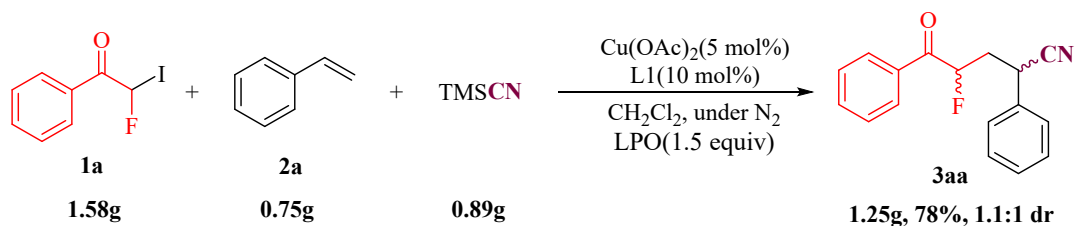

An oven-dried tube was charged with Copper(II) acetate (0.3 mmol, 5 mol %), Ligand 1 (0.6 mmol, 10 mol %), and LPO (9.0 mmol, 1.5 equiv). The tube was evacuated and backfilled with nitrogen (repeated three times). Then,  $\alpha$ -iodo- $\alpha$ -fluoroacetophenone **1** (6 mmol, 1.0 equiv) dissolved in dichloromethane (10.0 mL), styrene **2a** (7.2 mmol, 1.2 equiv), and TMSCN (9.0 mmol, 1.5 equiv) were added into the tube under the protection of nitrogen. The reaction mixture was stirring at room temperature for 8 h. After the reaction was completed, solvent was removed under reduced pressure by rotary evaporator, the crude residue was purified by silica-gel column chromatography (petroleum ether/EtOAc = 50:1) to afford the desired product **3aa**, 1.25g, in 78% yield with 1.1:1 dr.

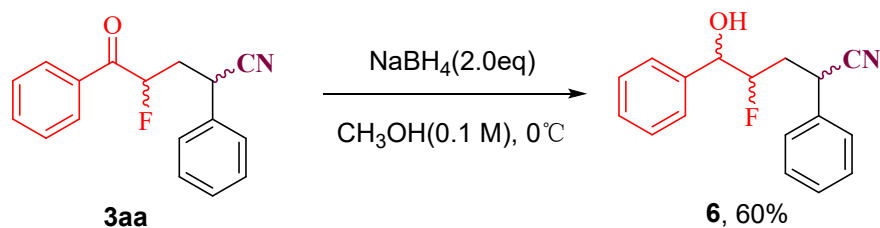

To a solution of **3aa** (0.4 mmol, 1.0 equiv) in  $\text{CH}_3\text{OH}$  was added portionwise  $\text{NaBH}_4$  (0.8 mmol, 2.0 equiv). The reaction was stirred at  $0^\circ\text{C}$  for 20 min. After completion of the reaction (as indicated by TLC), the solution poured into a saturated aqueous sodium hydrogencarbonate solution (5 mL), then extracted with ethyl acetate (3\*5 mL), the combined organic phase was dried over  $\text{Na}_2\text{SO}_4$ , filtered, and concentrated in vacuum, the crude residue was purified by silica-gel column chromatography (petroleum ether/EtOAc = 50:1-5:1) to afford desired the product **6**.

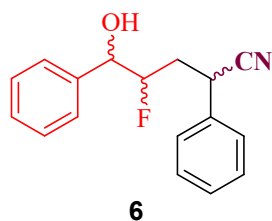

**4-fluoro-5-hydroxy-2,5-diphenylpentanenitrile**, purified by flash column chromatography on silica gel (PE/EA = 10/1), light white oily liquid, 64.6 mg, 60% yield.

$^1\text{H NMR}$  (400 MHz,  $\text{CDCl}_3$ ):  $\delta$  7.40-7.24 (m, 20H), 5.03-4.86 (m, 2H), 4.76-4.69 (m, 1H), 4.47-4.31 (m, 1H), 4.08-4.05 (m, 1H), 3.90-3.87 (m, 1H), 2.48-2.37 (m, 1H), 2.77 (br, 2H), 2.52-1.84 (m, 4H).

$^{13}\text{C NMR}$  (100 MHz,  $\text{CDCl}_3$ ):  $\delta$  138.29, 135.10 (d,  $J = 21.0\text{ Hz}$ ), 134.13 (d,  $J = 22.0\text{ Hz}$ ),

129.37, 129.33, 129.28, 128.91, 128.87, 128.79, 128.70, 128.64, 128.57, 128.43, 128.35, 127.76, 127.22, 127.20, 126.97, 126.91, 126.34, 126.30, 120.84(d,  $J = 17.0\text{Hz}$ ), 119.90(d,  $J = 15.0\text{Hz}$ ), 94.40(d,  $J = 21.0\text{Hz}$ ), 93.42, 93.00(d,  $J = 21.0\text{Hz}$ ), 91.84(d,  $J = 34.0\text{Hz}$ ), 75.78, 75.65, 75.62, 75.49, 74.43(d,  $J = 17.0\text{Hz}$ ), 37.69(d,  $J = 17.0\text{Hz}$ ), 36.53(d,  $J = 17.0\text{Hz}$ ), 33.59, 32.99.

$^{19}\text{F}$  NMR (376 MHz,  $\text{CDCl}_3$ ):  $\delta$  -189.37 (s, 1F), -190.72 (s, 1F), -192.15 (d,  $J = 15.04\text{Hz}$ , 2F).

HRMS (ESI)  $m/z$   $[\text{M} + \text{Na}]^+$  calcd for  $\text{C}_{17}\text{H}_{16}\text{FNONa}^+$ : 292.1108; found: 292.1112.

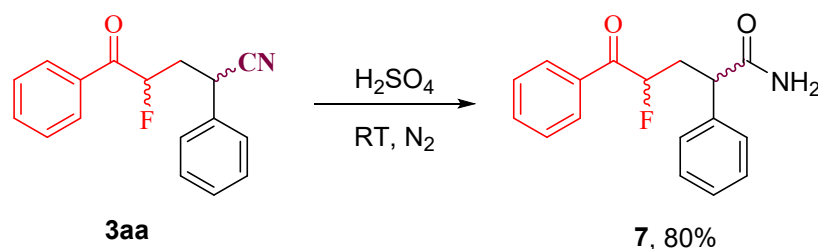

In a flame-dried schlenk tube equipped with a magnetic bar, **3aa** (0.4 mmol) was dissolved in  $\text{H}_2\text{SO}_4$  (1 mL) under nitrogen atmosphere. The reaction mixture was stirred at room temperature for 3 h. After the reaction was completed, water was added drop wise to reaction mixture in order to quench the reaction. The resulting solution was extracted with EtOAc ( $3 \times 5$  ml), washed with brine, dried over  $\text{Na}_2\text{SO}_4$ , filtered, and concentrated in vacuo. The crude residue was purified by column chromatography on silica gel (petroleum ether/ethyl acetate =5:1) to afford product **7**.<sup>[2]</sup>

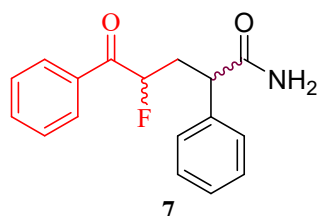

**4-fluoro-5-oxo-2,5-diphenylpentanamide**, purified by flash column chromatography on silica gel (PE/EA = 5/1), solid white, mp = 60-62°C, 91.3 mg, 80% yield.

$^1\text{H}$  NMR (400 MHz,  $\text{CDCl}_3$ ):  $\delta$  8.09-8.07 (d,  $J = 8.0\text{Hz}$ , 2H), 7.74-7.21(m, 18H), 6.00-5.88(m, 2H), 5.74-5.60(m, 2H), 5.36-5.23(m, 2H), 3.91-3.79(m, 2H), 2.91-2.40(m, 4H).

$^{13}\text{C}$  NMR (100 MHz,  $\text{CDCl}_3$ ):  $\delta$  196.14 (d,  $^2J_{\text{C-F}} = 14.0\text{Hz}$ ), 195.64 (d,  $^2J_{\text{C-F}} = 13.0\text{Hz}$ ), 174.80, 171.24, 139.15, 137.87, 134.05, 133.92, 133.86, 133.61, 129.35, 129.12, 128.89, 128.75, 128.72, 128.69, 128.63, 128.43, 128.21, 127.77, 127.66, 126.66, 126.10, 91.85 (d,  $^1J_{\text{C-F}} = 55.0\text{Hz}$ ), 90.40 (d,  $^1J_{\text{C-F}} = 58.0\text{Hz}$ ), 47.77, 47.41, 36.92 (d,  $^2J_{\text{C-F}} = 16.0\text{Hz}$ ), 35.80 (d,  $^2J_{\text{C-F}} = 16.0\text{Hz}$ ).

$^{19}\text{F}$  NMR (376 MHz,  $\text{CDCl}_3$ ):  $\delta$  -192.92 (s, 1F), -195.03 (s, 1F).

HRMS (ESI)  $m/z$   $[\text{M} + \text{Na}]^+$  calcd for  $\text{C}_{17}\text{H}_{16}\text{FNO}_2\text{Na}^+$ : 308.1057; found: 308.1060.

## 6. Mechanism investigation

### 6.1 Trapping experiment with TEMPO free radical

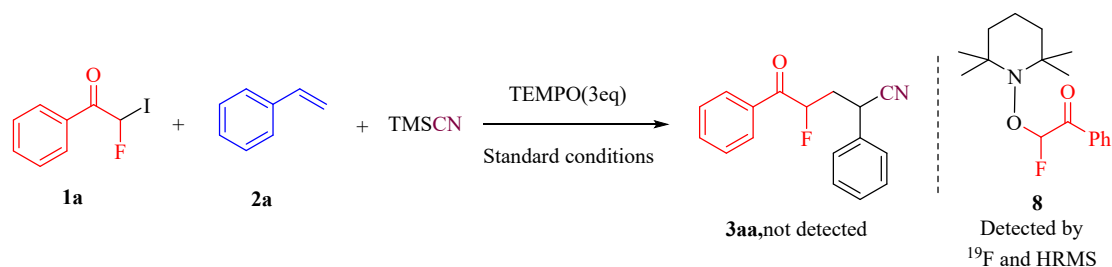

Three control experiments were designed to rationalized the reaction pathway. First, the radical scavenger 2,2,6,6-tetramethyl-1-piperidinyloxy (TEMPO) was added to the three-component reaction under standard conditions. No desired product **3aa** was obtained; instead, compound **8** was detected by  $^{19}\text{F}$  NMR ((376 MHz,  $\text{CDCl}_3$ ): $\delta$  -115.63 (d,  $J = 60.16$  Hz), for compound **8**). The result indicates that a monofluoroalkyl radical addition pathway might be involved in this process.<sup>[3]</sup>

HRMS (ESI)  $m/z$   $[\text{M} + \text{Na}]^+$  calcd for  $\text{C}_{17}\text{H}_{24}\text{FNO}_2\text{Na}^+$ : 316.1689; found: 316.1682.

**Scheme 1** Trapping experiment in the standard reaction. ( $^{19}\text{F}$  NMR and HRMS)

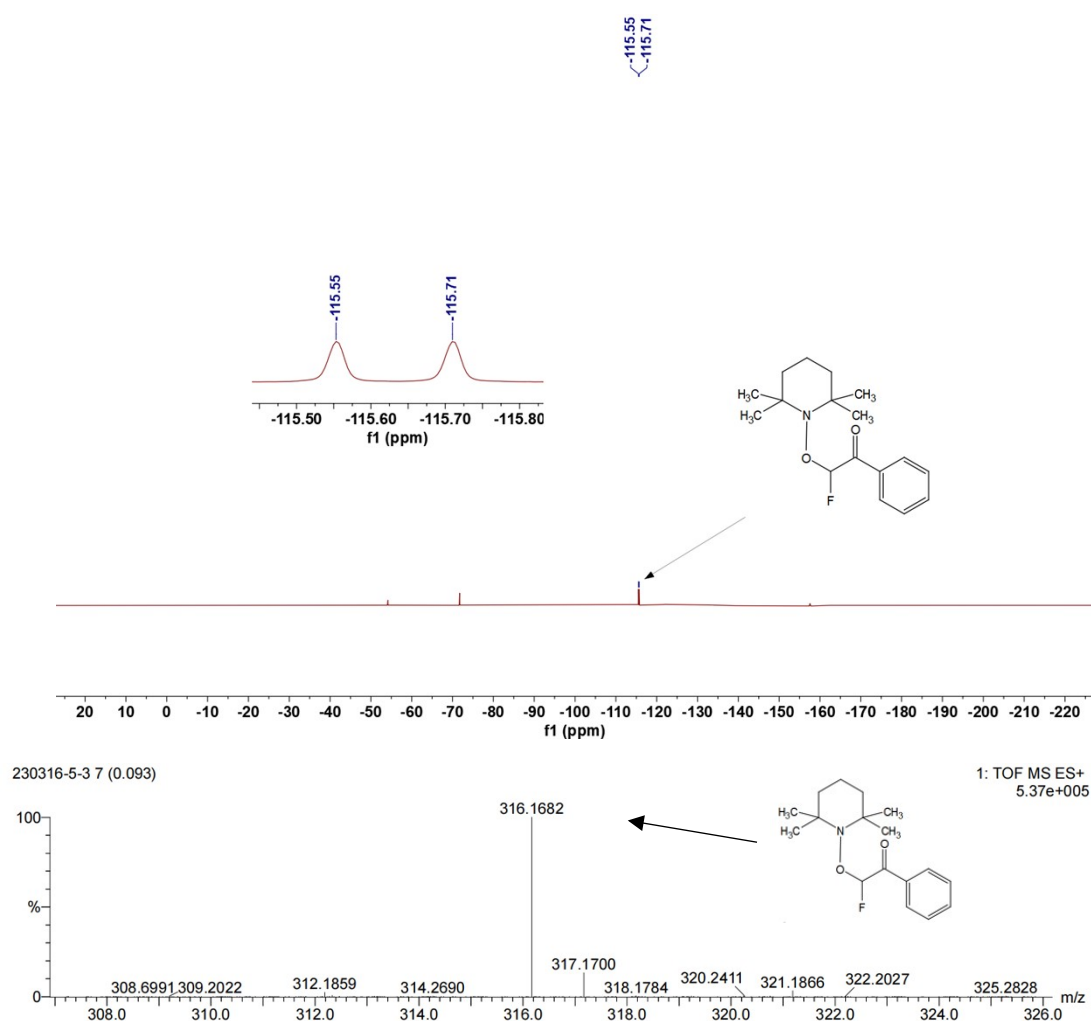

## 6.2 Control experiment

Another control reaction was carried no desired product 3aa was detected in the absence of LPO.

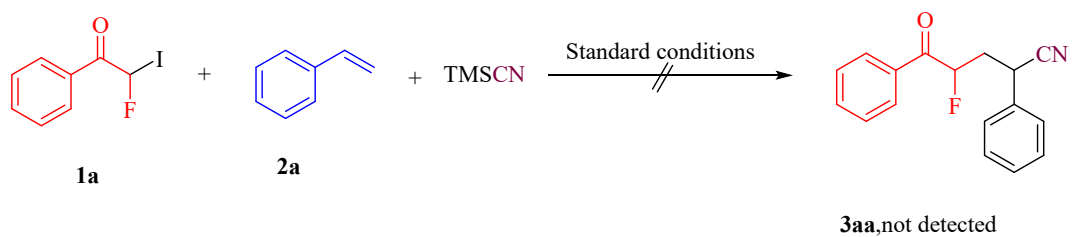

**Scheme 2** The absence of LPO under the standard reaction conditions.



## 7. References

- [1] (a) I. Saidalimu, X. Fang, W.-W. Lv, X.-Y. Yang, X.-P. He, Zhang, Z.-Y, F.-H. Wu. *Adv. Synth. Catal.* **2013**, 355, 857-863. (b) I. Saidalimu, X. Fang, X.-P. He, J. Liang, X.-Y. Yang, F.-H. Wu, *Angew. Chem., Int. Ed.* **2013**, 52, 5566-5570. (c) C. Zheng, X. Cui, J. Wu, P. Wu, Y. Yu, H. Liu, F. Wu, *Eur. J. Org. Chem.* **2022**, e202200952.
- [2] X. Zhu, W. Deng, M.-F. Chiou, C. Ye, W. Jian, Y. Zeng, Y. Jiao, L. Ge, Y. Li, X. Zhang, H. Bao, *J. Am. Chem. Soc.* **2019**, 141, 548-559.
- [3] J. Ren, X. Fu, Y. Hou, J. Wu and F. Wu, *Tetrahedron. Lett.*, **2020**, 66, 152805.

## 8. <sup>1</sup>H NMR, <sup>13</sup>C NMR, <sup>19</sup>F NMR Spectra, HRMS and Noesy for

**5a**

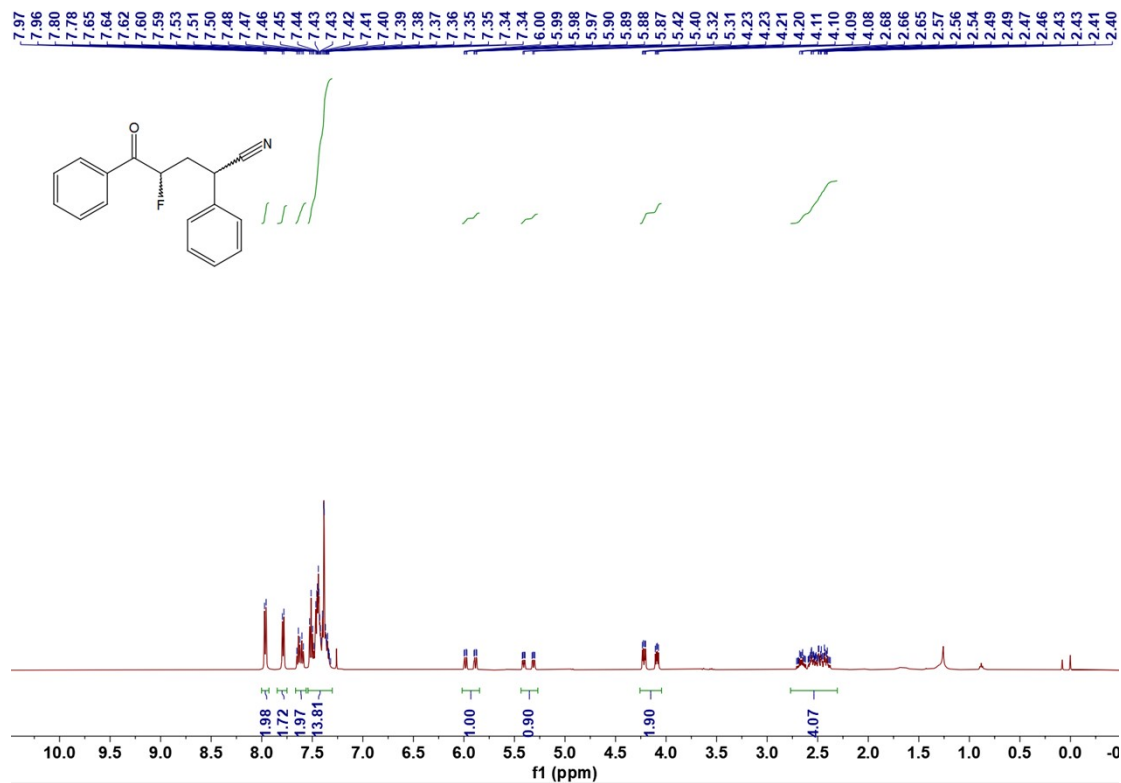

<sup>1</sup>H NMR of 3aa

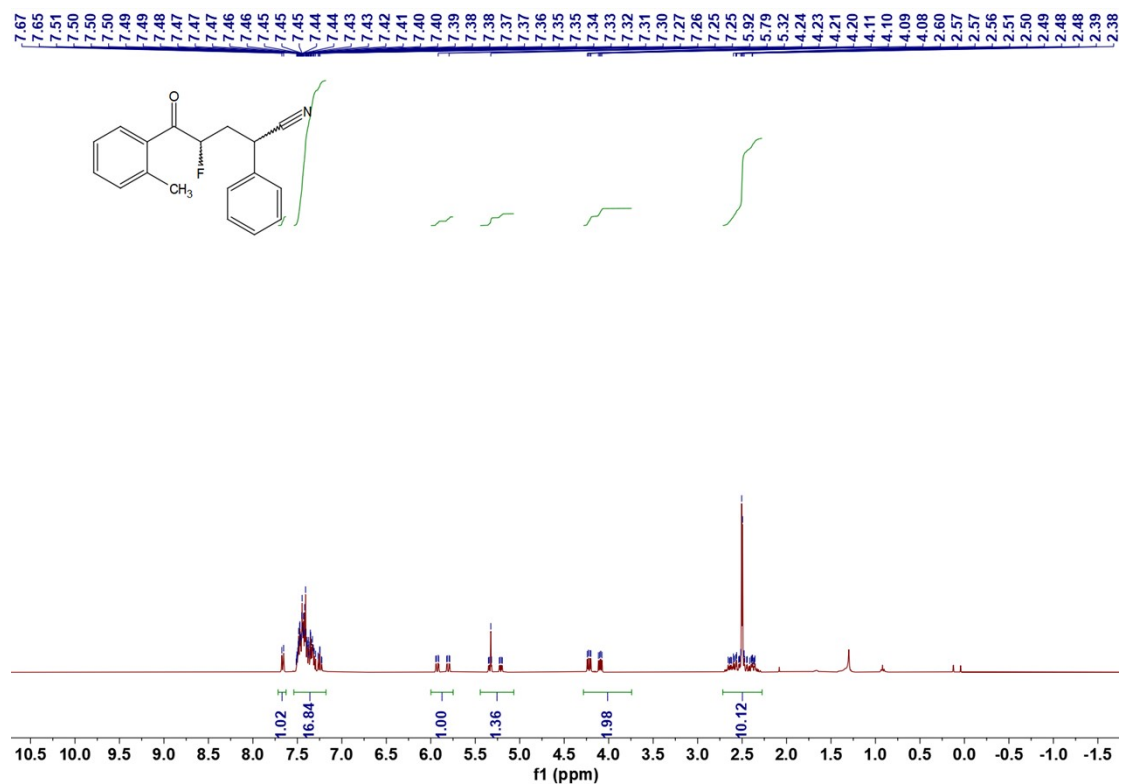

<sup>1</sup>H NMR of 3ba

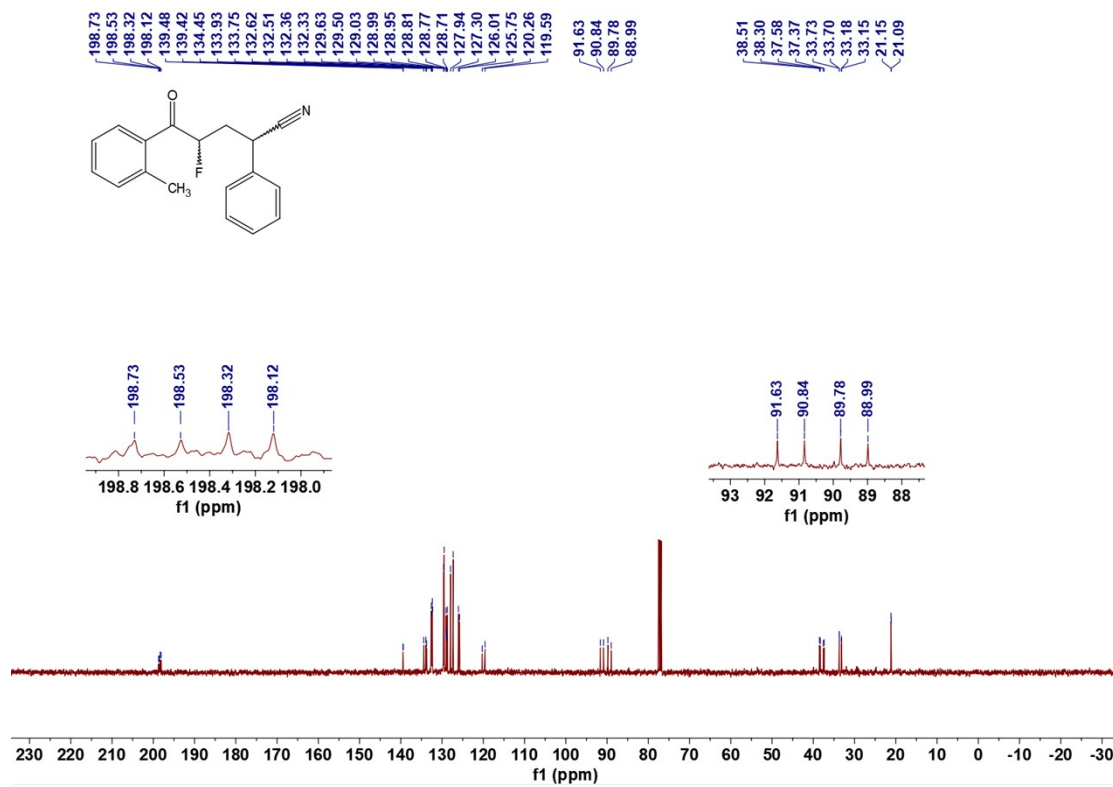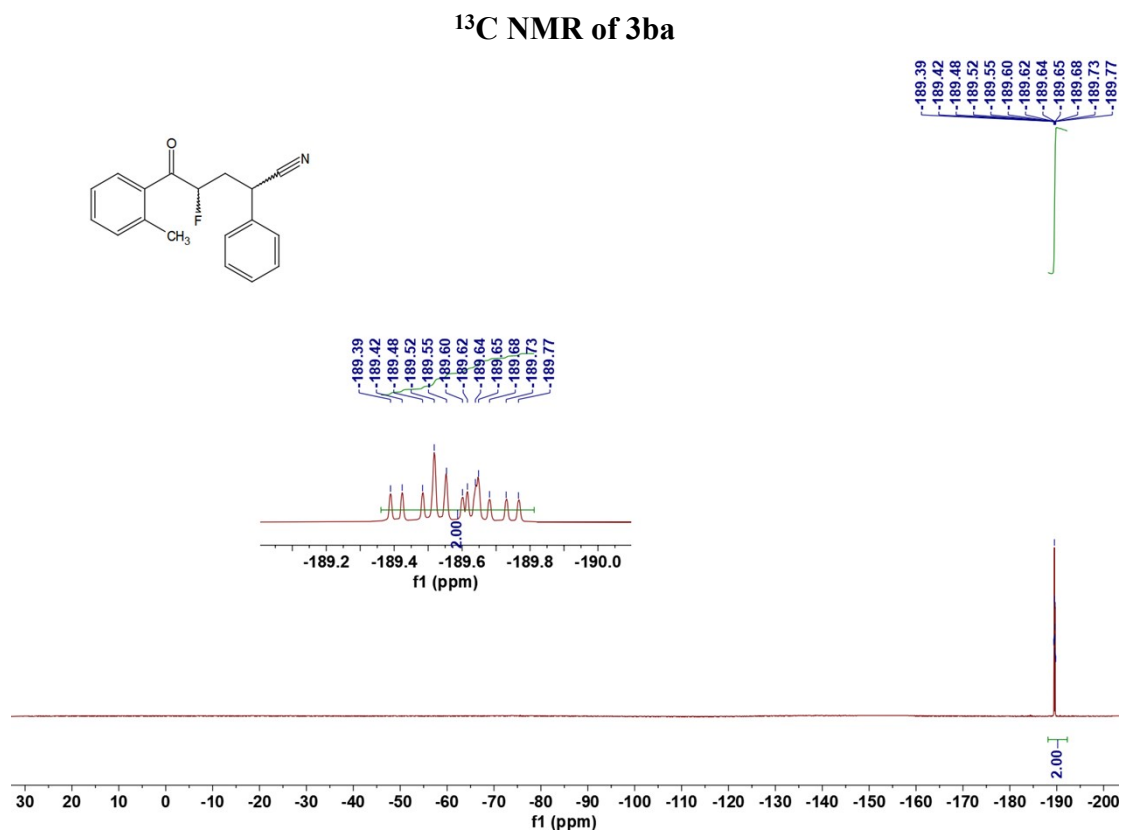

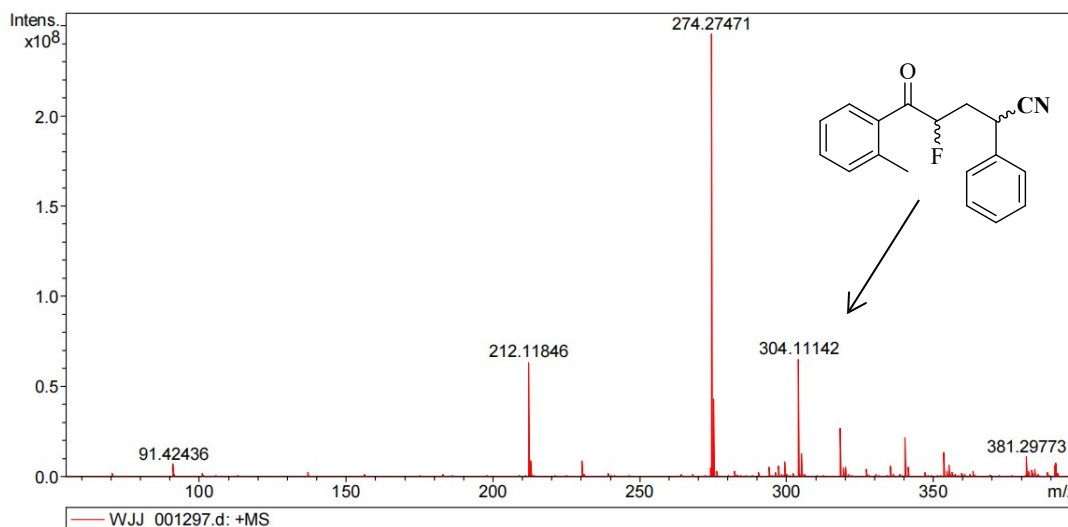

### HRMS of 3ba

7.76  
7.74  
7.57  
7.55  
7.49  
7.47  
7.46  
7.44  
7.43  
7.43  
7.42  
7.41  
7.40  
7.39  
7.38  
7.37  
7.36  
7.35  
7.34  
7.34  
7.33  
7.33  
7.32  
6.00  
5.99  
5.97  
5.88  
5.87  
5.85  
5.84  
5.43  
5.42  
5.31  
5.30  
4.23  
4.22  
4.20  
4.19  
4.10  
4.09  
4.08  
4.06  
2.67  
2.65  
2.64  
2.63  
2.56  
2.56  
2.54  
2.53  
2.48  
2.47  
2.45  
2.45  
2.44  
2.42  
2.40  
2.39  
2.37

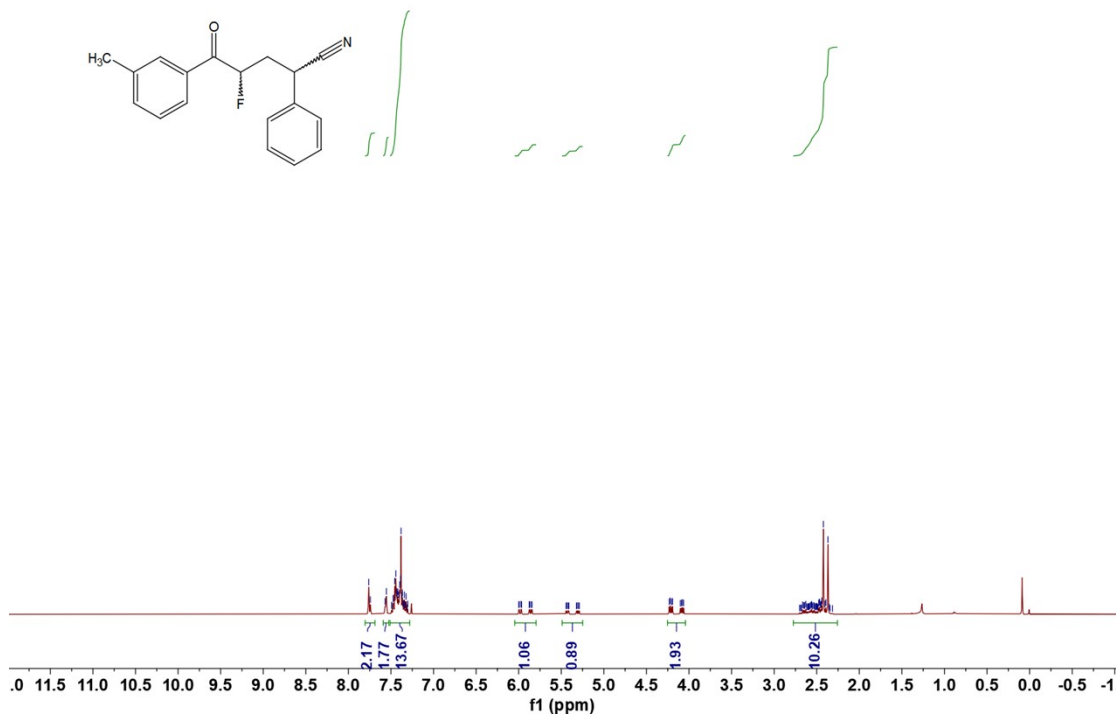

### <sup>1</sup>H NMR of 3ca

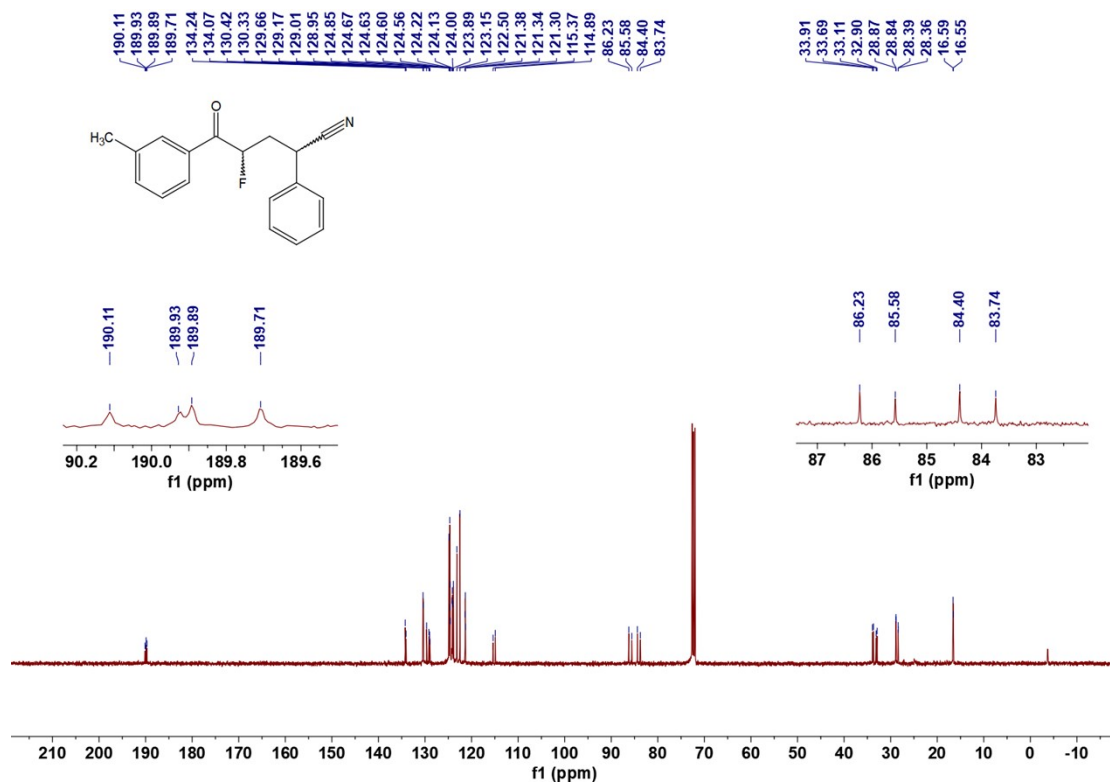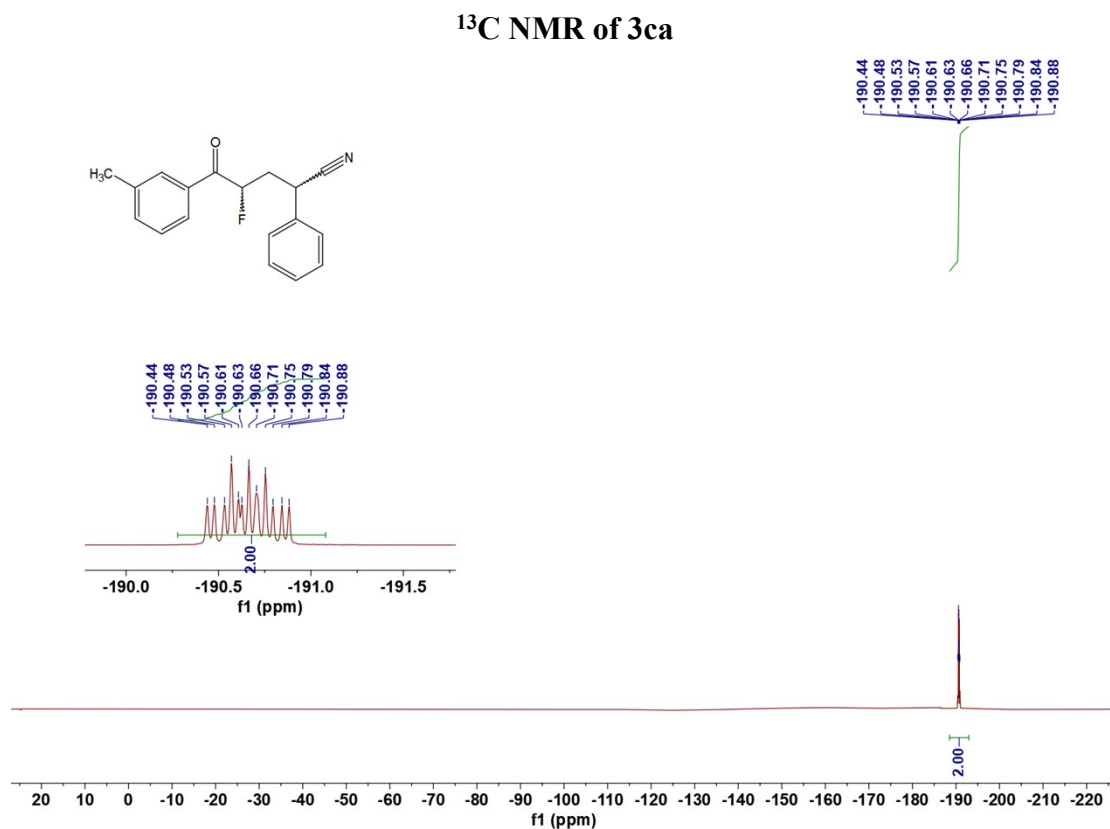

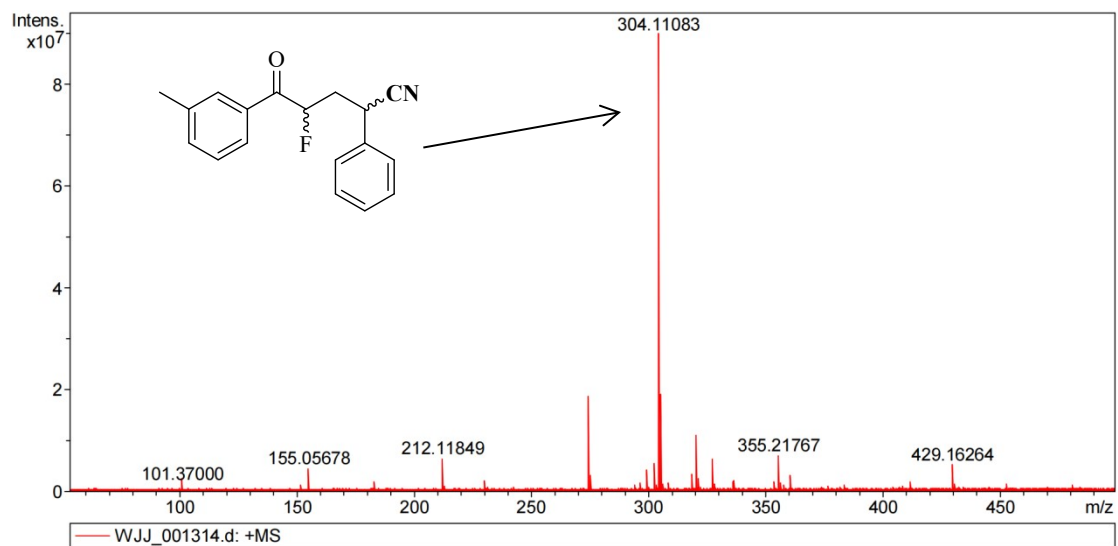

### HRMS of 3ca

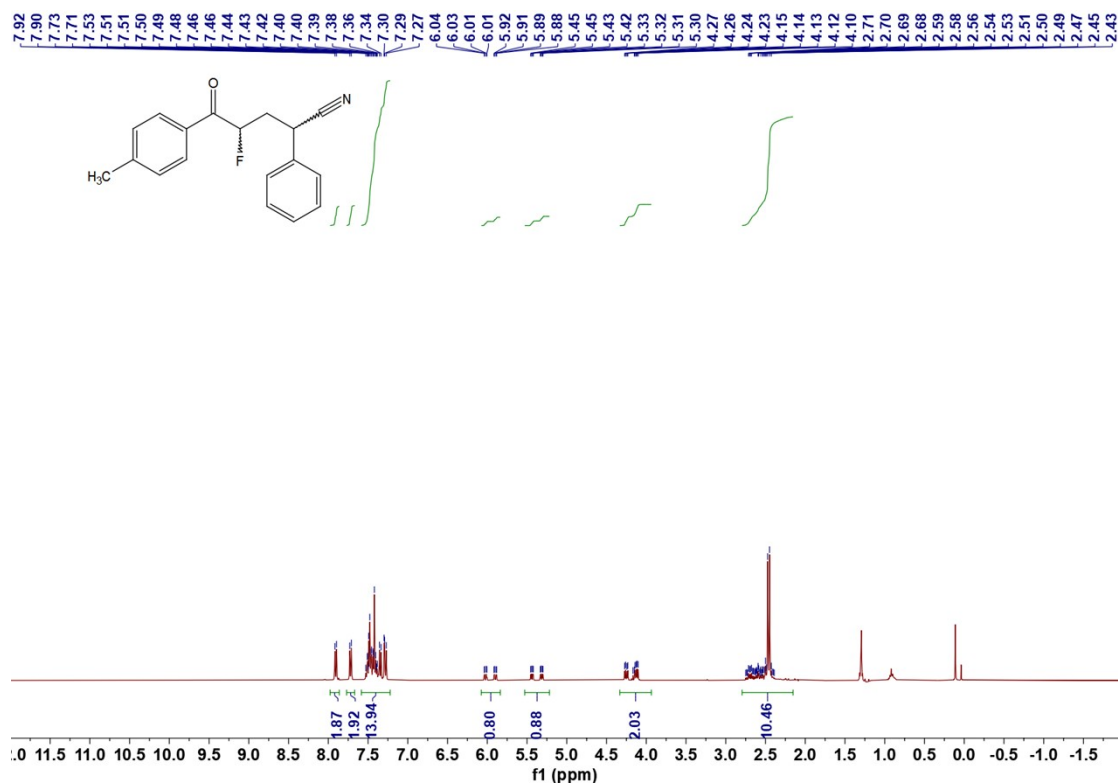

### <sup>1</sup>H NMR of 3da

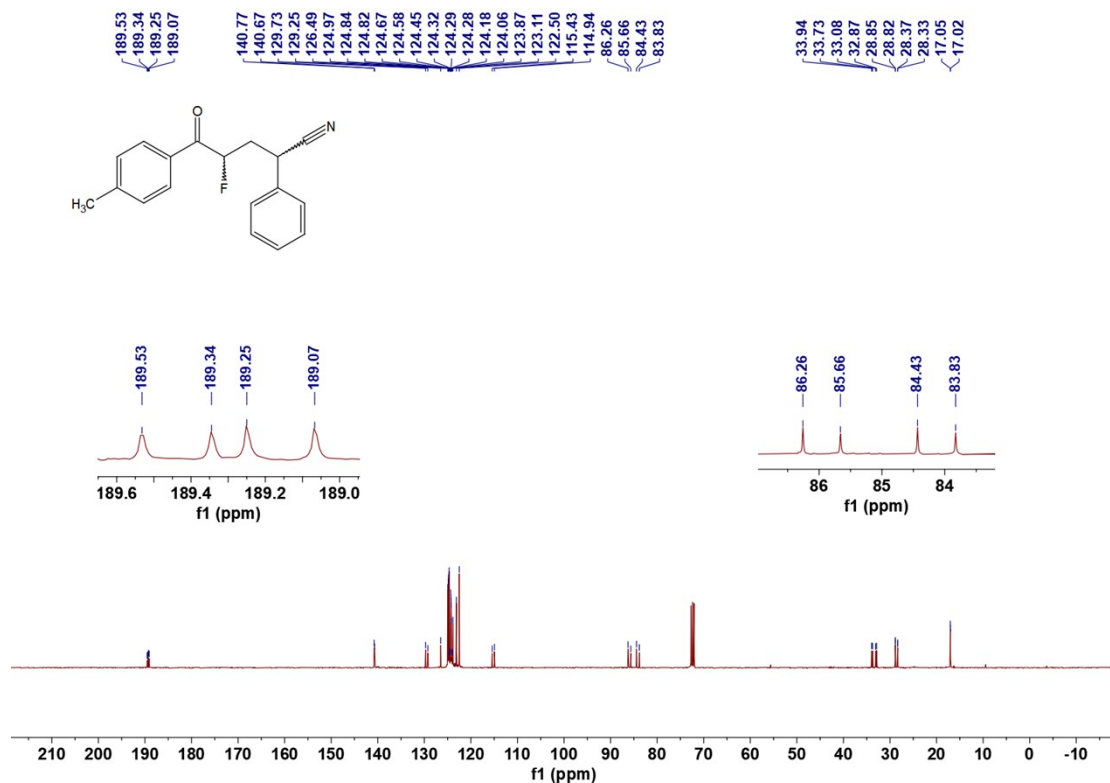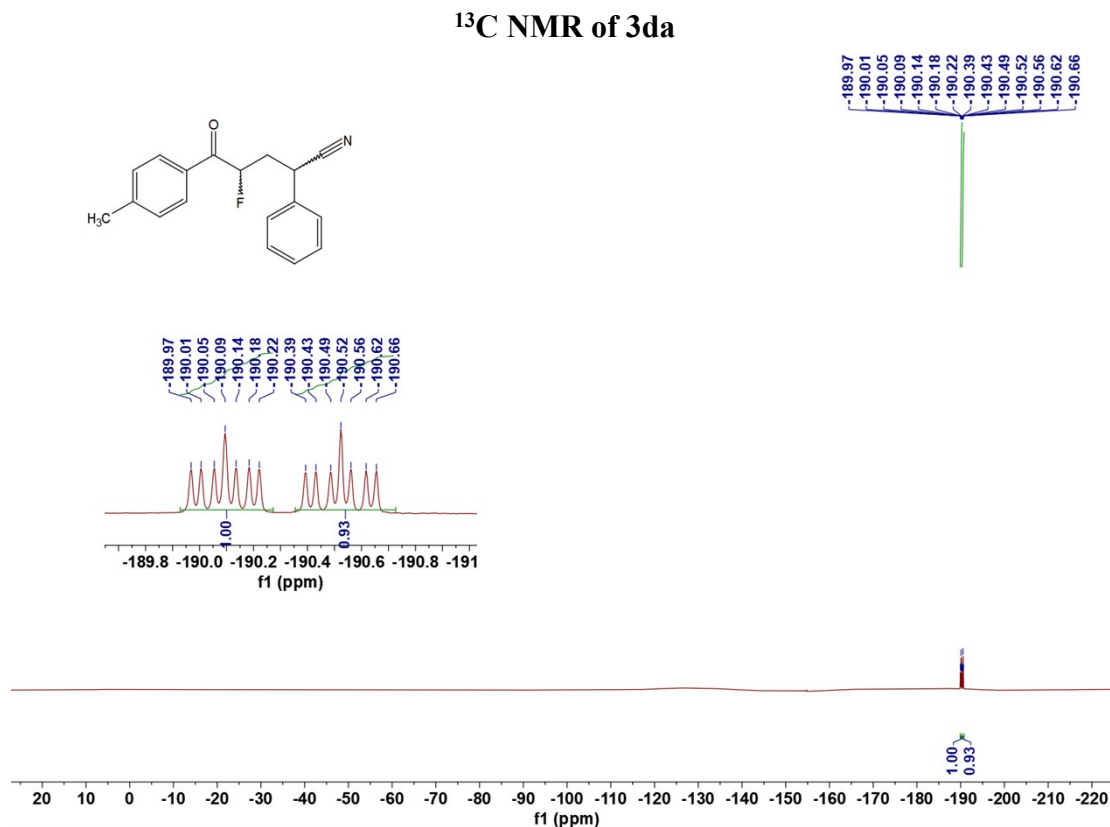

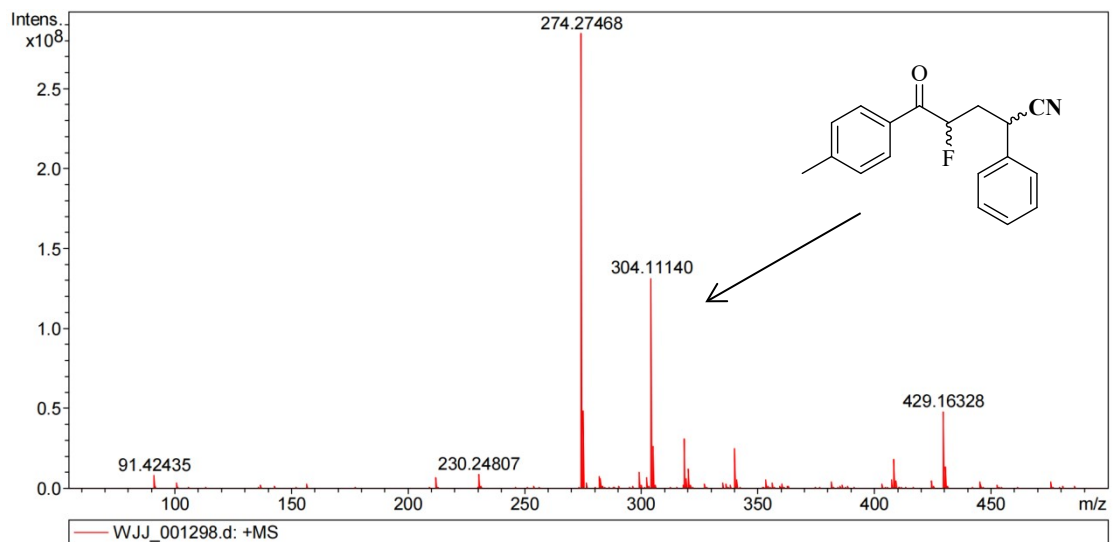

### HRMS of 3da

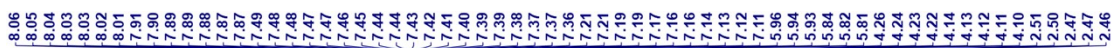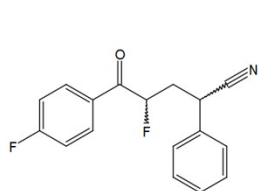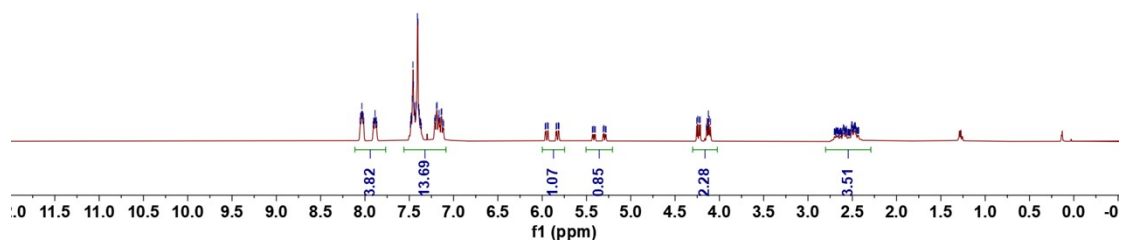

### <sup>1</sup>H NMR of 3ea



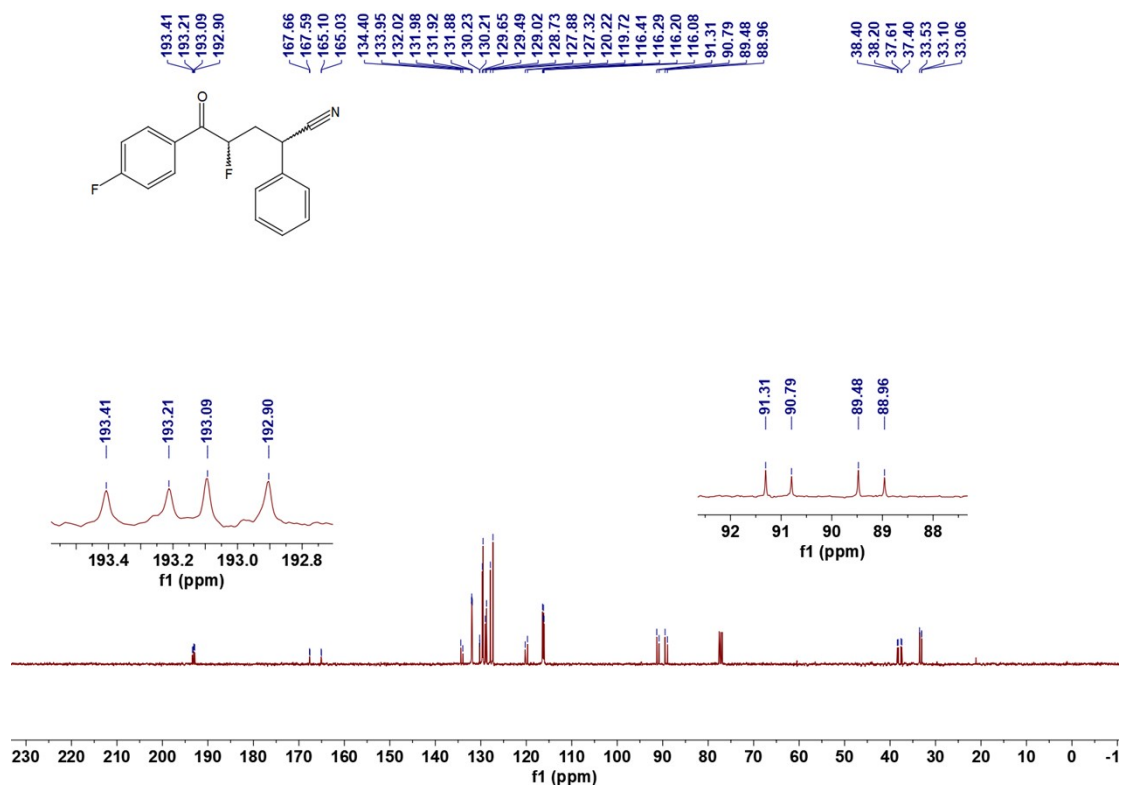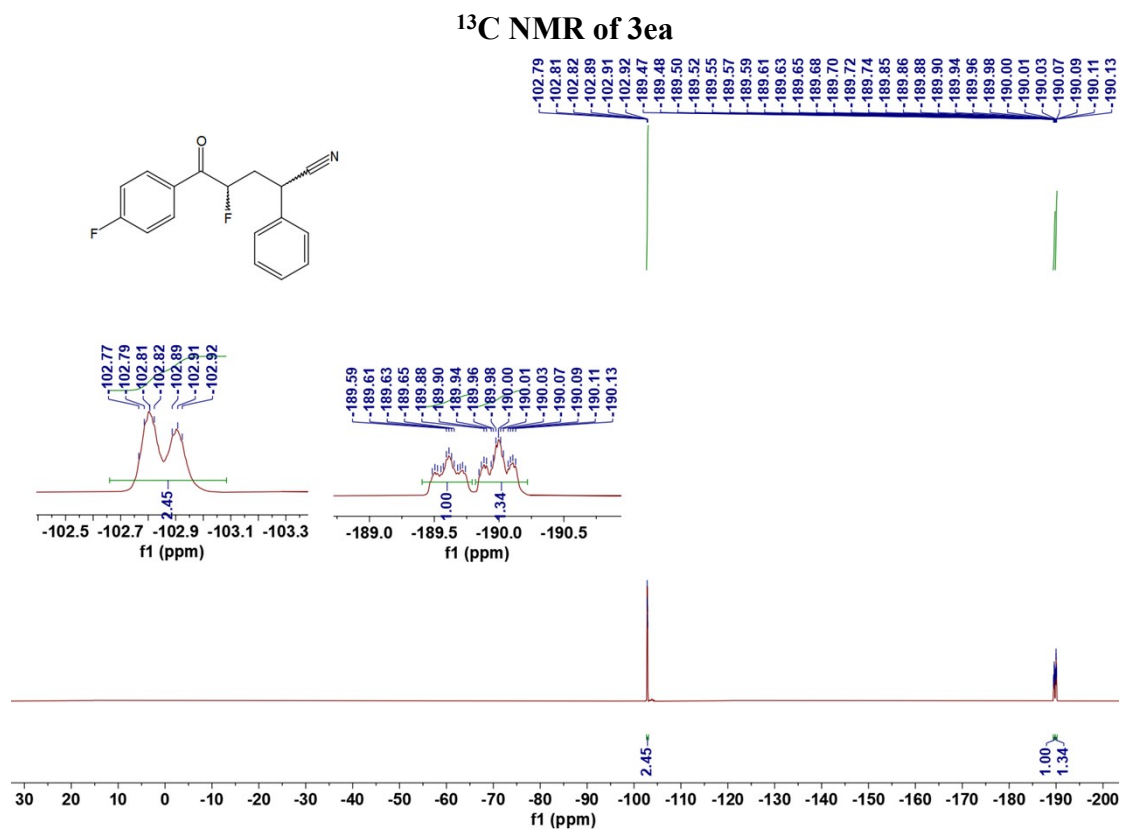

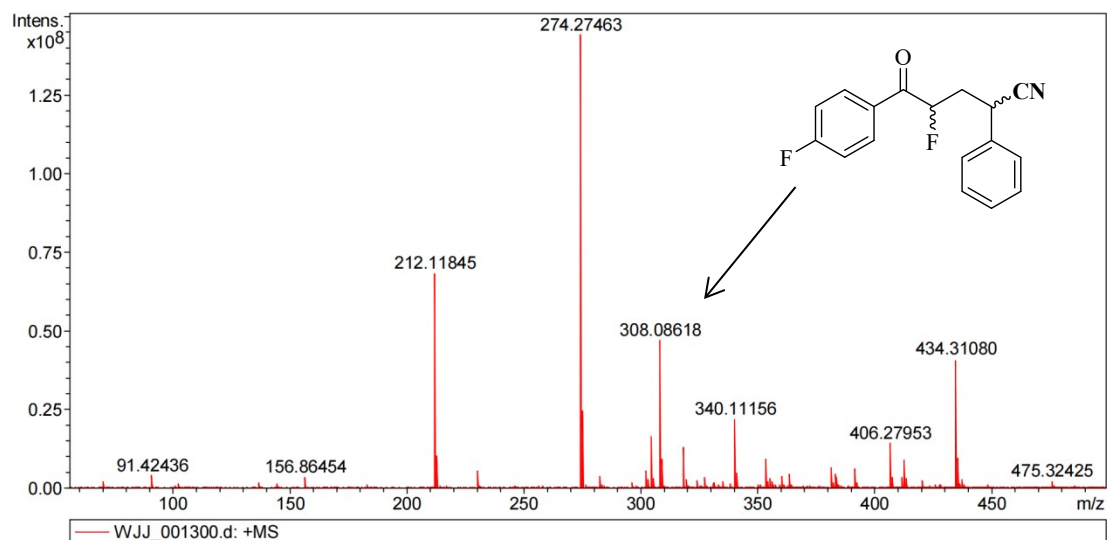

### HRMS of 3ea

7.76  
7.73  
7.71  
7.64  
7.62  
7.59  
7.56  
7.41  
7.39  
7.38  
7.36  
7.35  
7.31  
7.29  
7.26  
7.25  
7.23  
7.21  
7.18  
7.16  
7.13  
7.12  
5.78  
5.76  
5.66  
5.64  
5.28  
5.27  
5.26  
5.24  
5.23  
5.16  
5.15  
5.13  
5.12  
5.11  
4.14  
4.12  
4.11  
4.10  
4.03  
4.02  
4.01  
4.00  
3.98  
2.62  
2.61  
2.60  
2.59  
2.57  
2.55  
2.52  
2.51  
2.49  
2.46  
2.43  
2.42  
2.41  
2.39  
2.38  
2.37  
2.36  
2.34

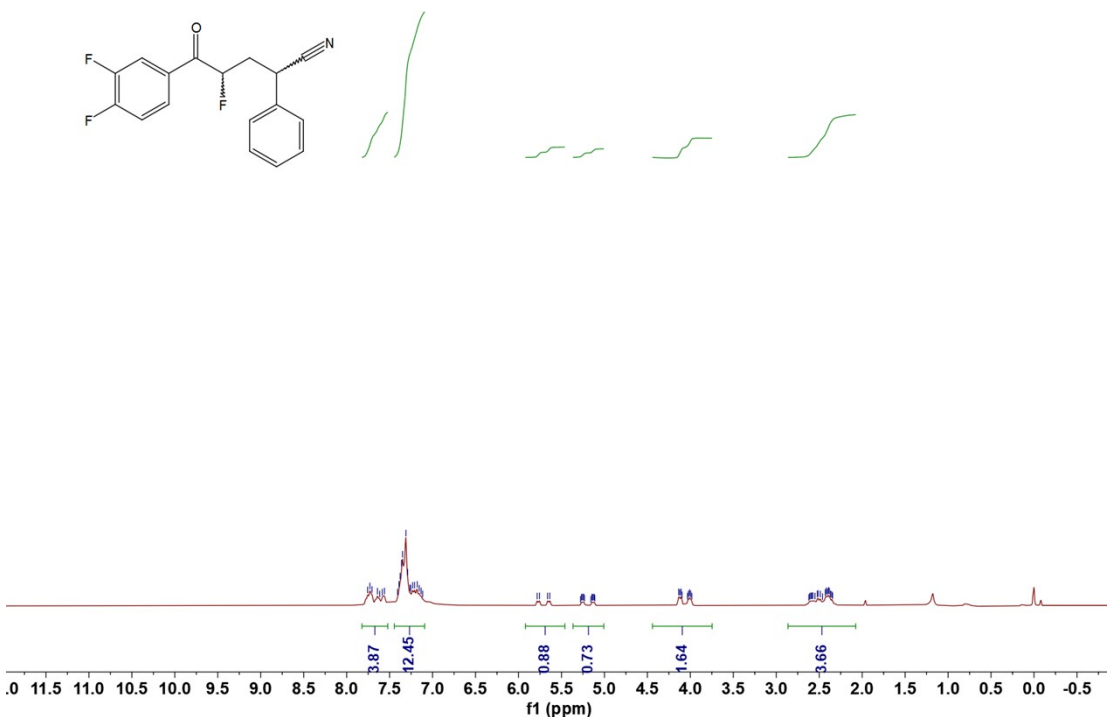

### <sup>1</sup>H NMR of 3fa

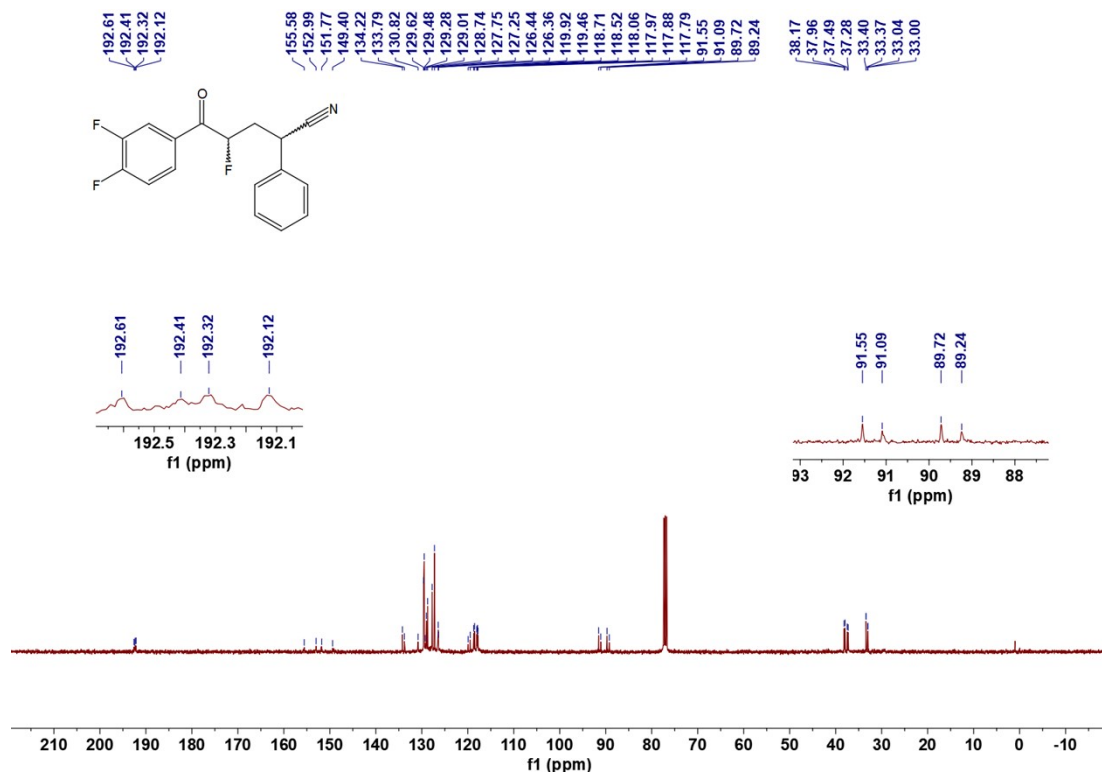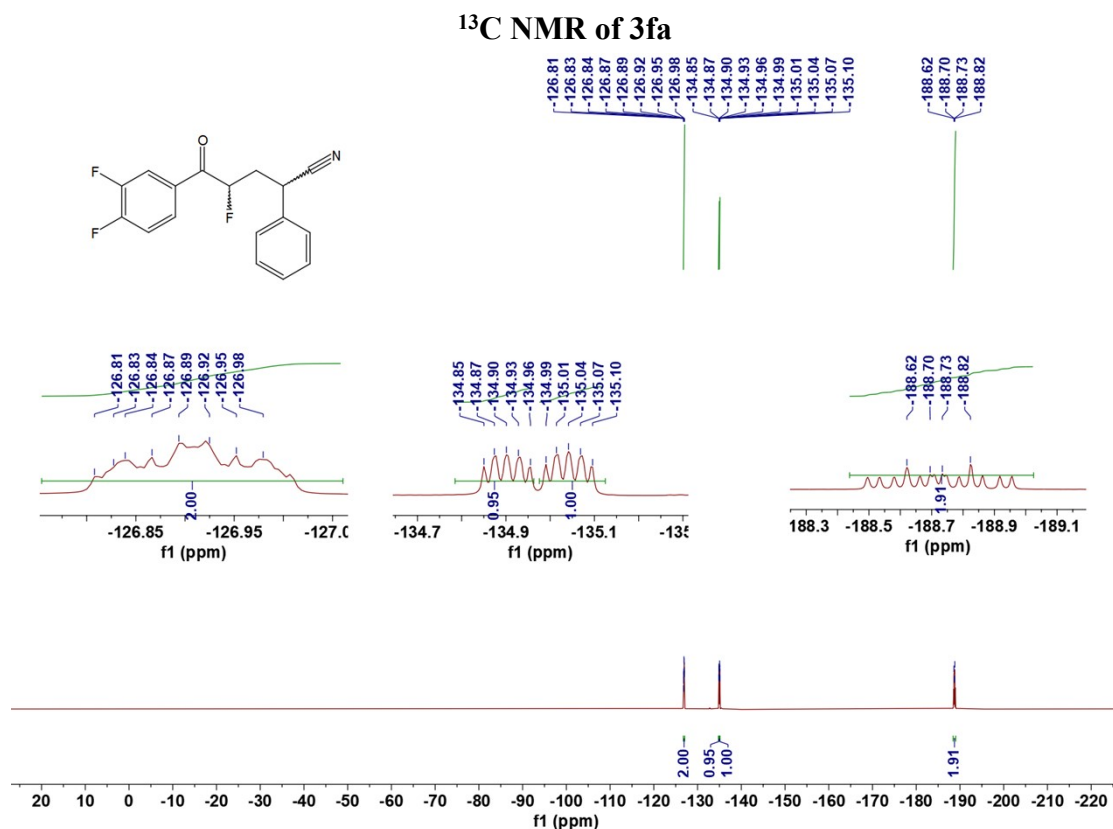

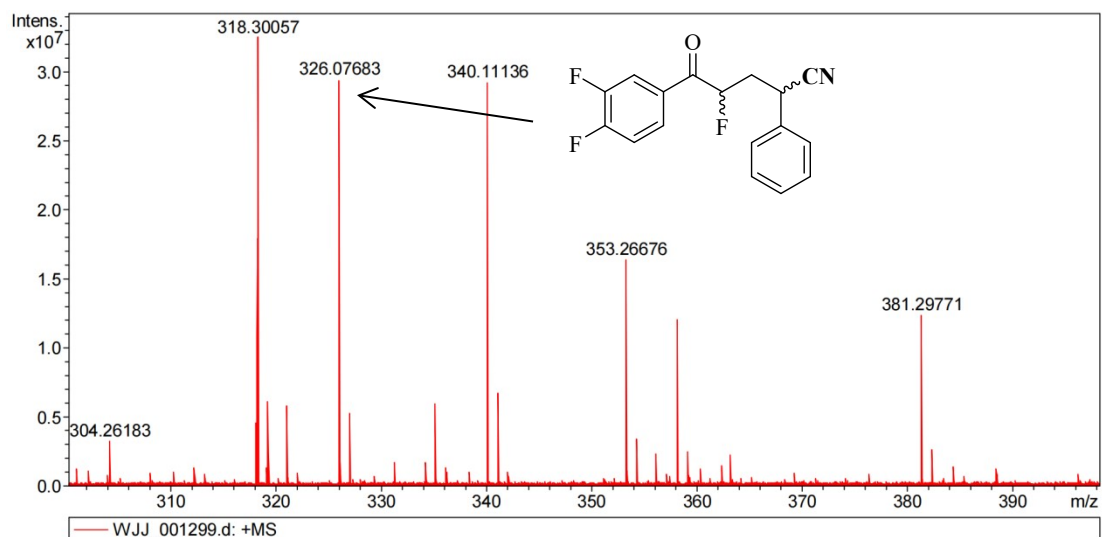

### HRMS of 3fa

7.83  
7.81  
7.67  
7.65  
7.65  
7.62  
7.59  
7.57  
7.47  
7.47  
7.45  
7.44  
7.42  
7.41  
7.41  
7.40  
7.39  
7.38  
7.37  
7.36  
7.36  
7.34  
5.92  
5.91  
5.89  
5.88  
5.80  
5.79  
5.77  
5.77  
5.36  
5.35  
5.34  
5.24  
5.23  
5.22  
4.22  
4.21  
4.19  
4.18  
4.12  
4.10  
4.08  
4.07  
4.06  
2.67  
2.65  
2.64  
2.63  
2.59  
2.57  
2.56  
2.55  
2.53  
2.53  
2.47  
2.46  
2.45  
2.45  
2.44  
2.43  
2.42  
2.40  
2.39

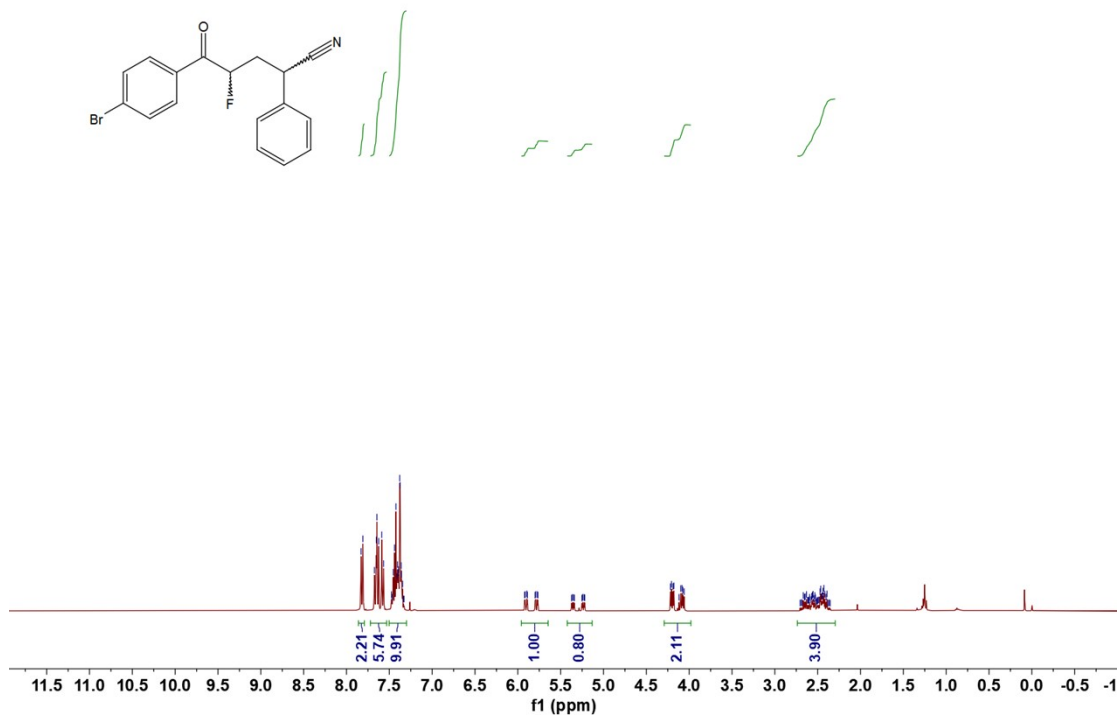

### <sup>1</sup>H NMR of 3ga

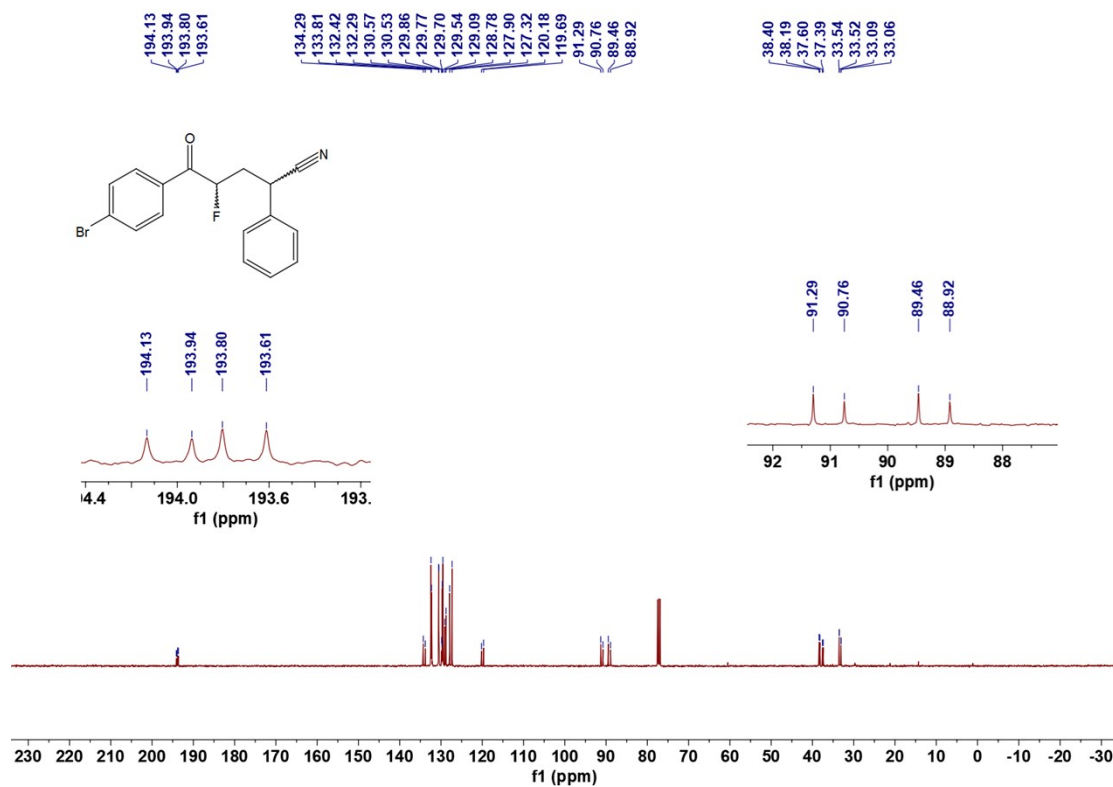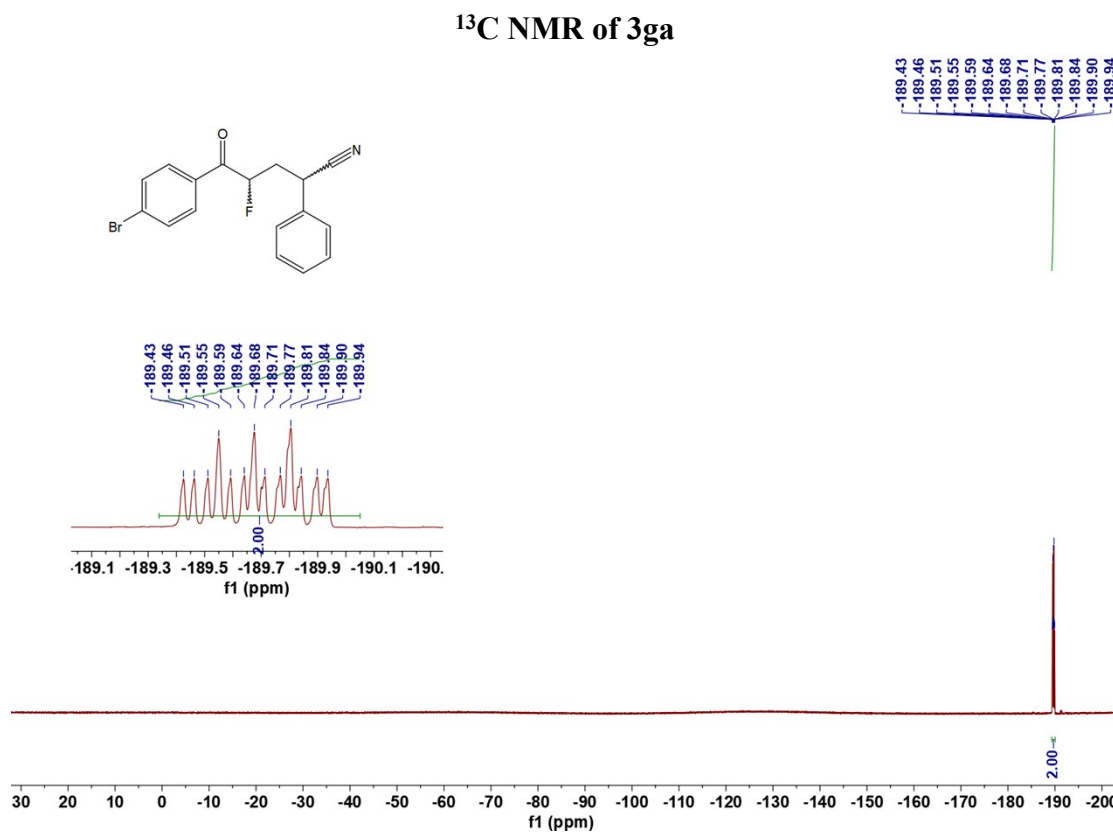

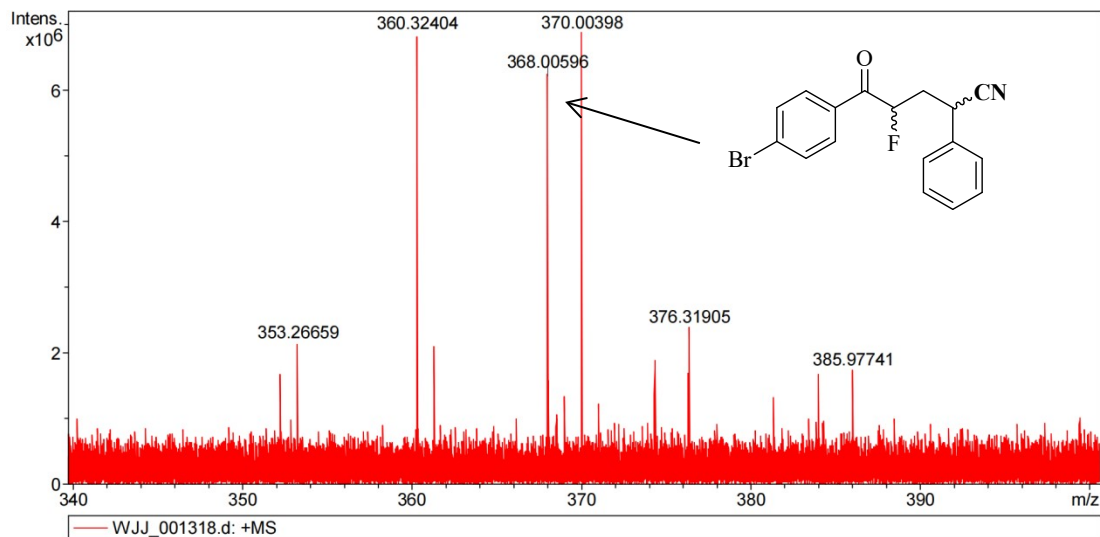

### HRMS of 3ga

8.22 8.16 8.14 8.06 8.04 8.02 7.89 7.87 7.84 7.67 7.65 7.63 7.61 7.59 7.48 7.47 7.45 7.43 7.42 7.40 7.39 7.37 7.35 7.34 5.93 5.92 5.90 5.89 5.81 5.80 5.78 5.77 5.42 5.41 5.40 5.39 5.30 5.29 5.28 5.27 4.23 4.22 4.20 4.19 4.12 4.10 4.09 4.08 2.70 2.68 2.68 2.66 2.64 2.63 2.62 2.60 2.60 2.54 2.52 2.52 2.49 2.47 2.46 2.45

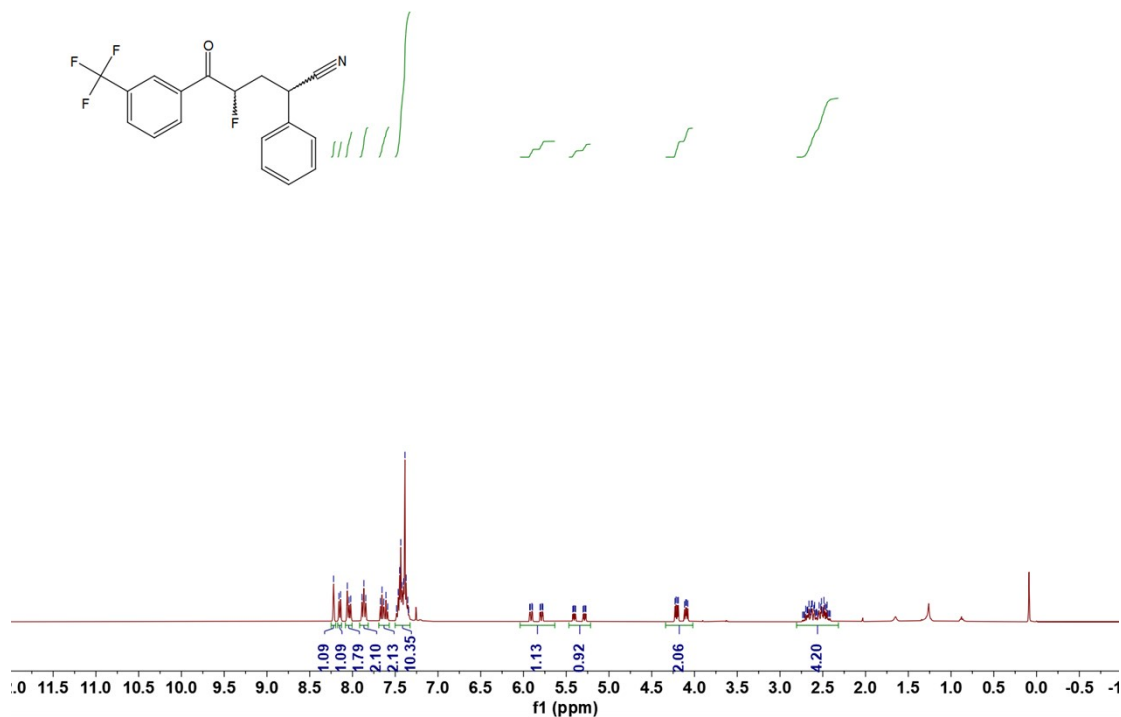

### <sup>1</sup>H NMR of 3ha

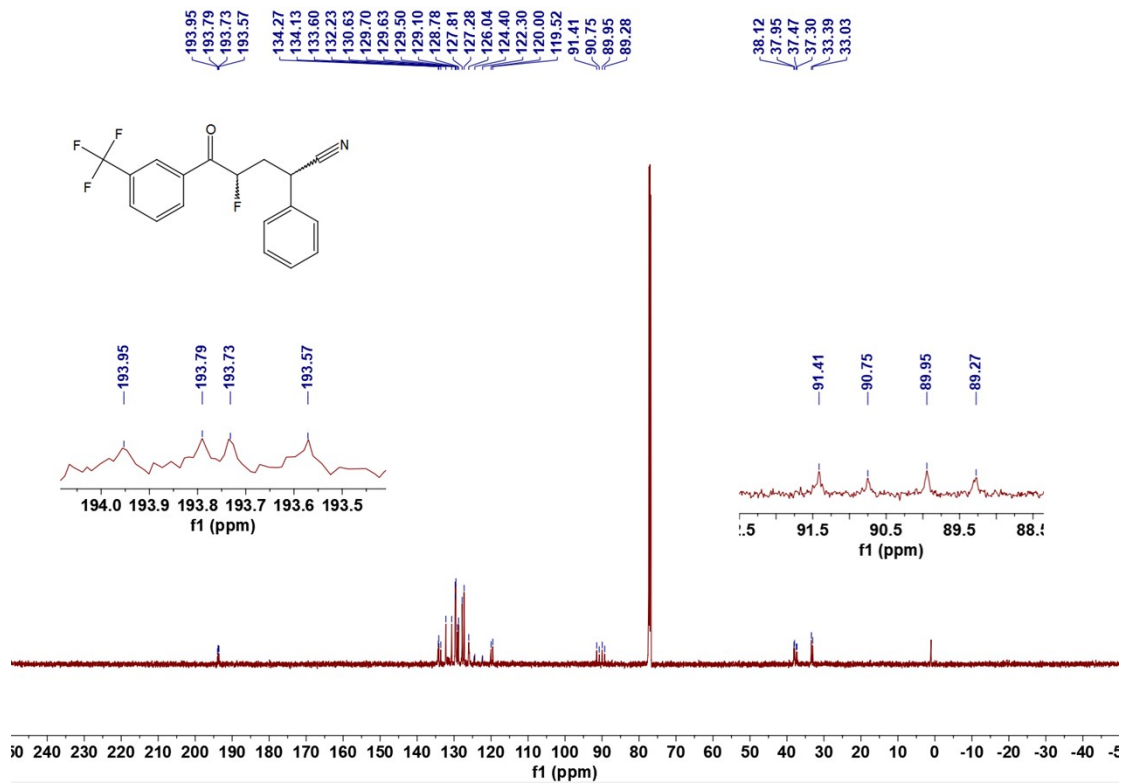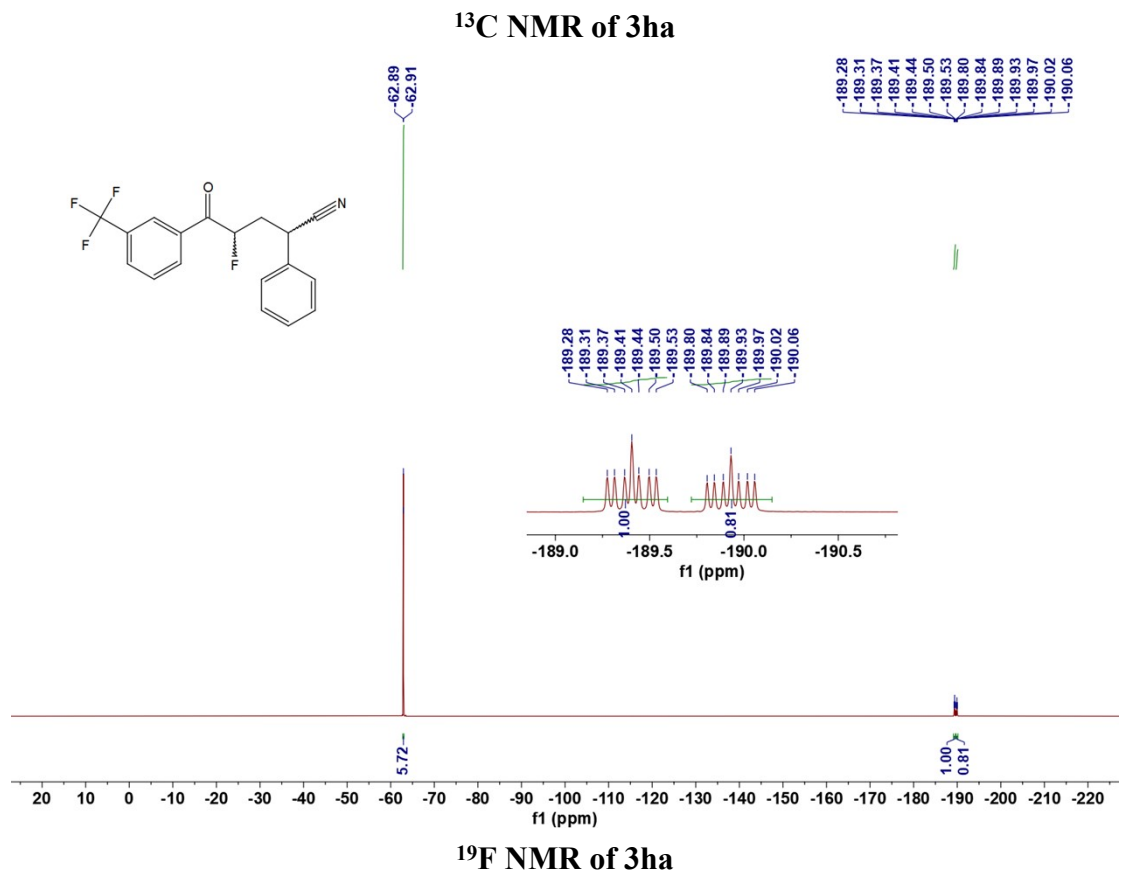

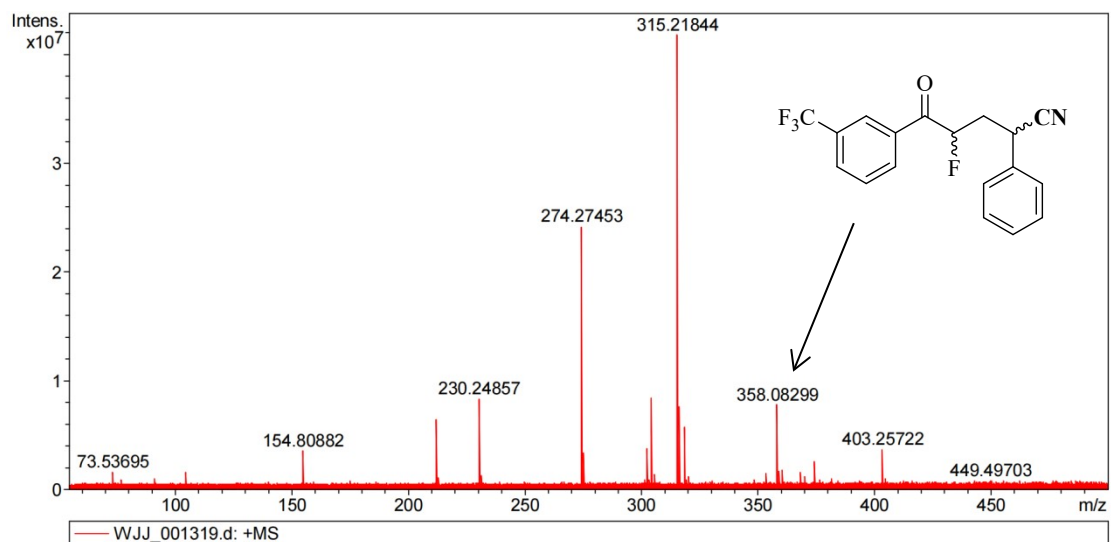

### HRMS of 3ha

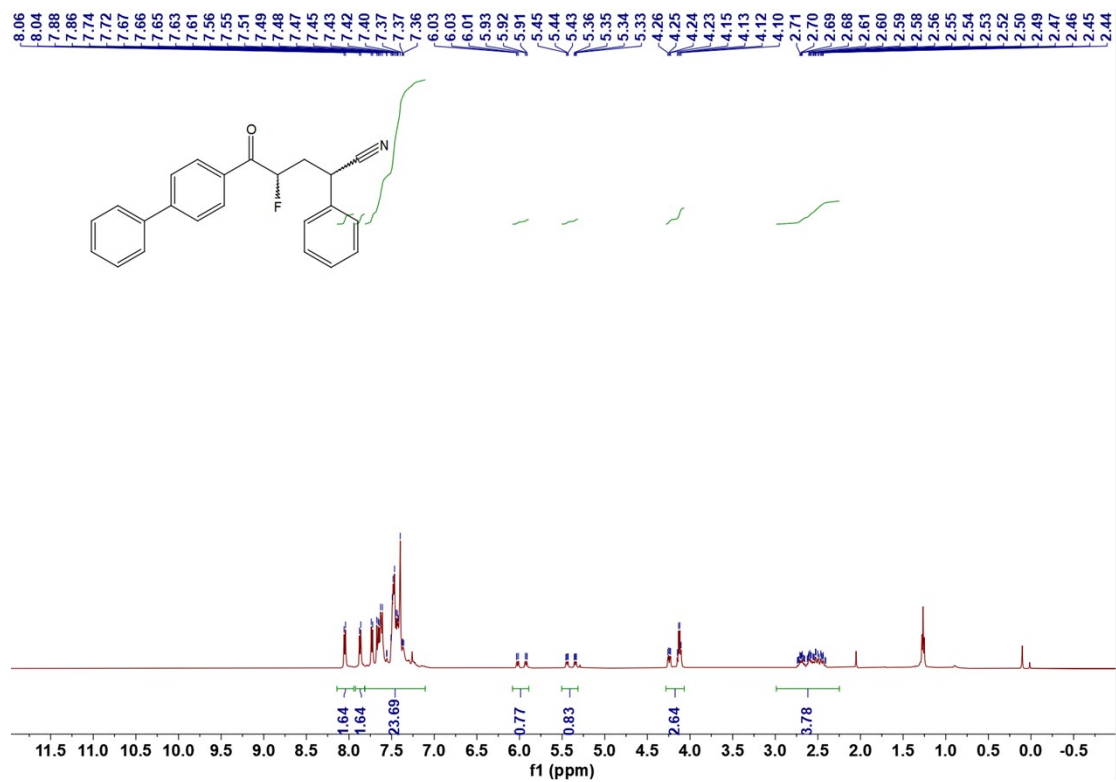

### <sup>1</sup>H NMR of 3ia



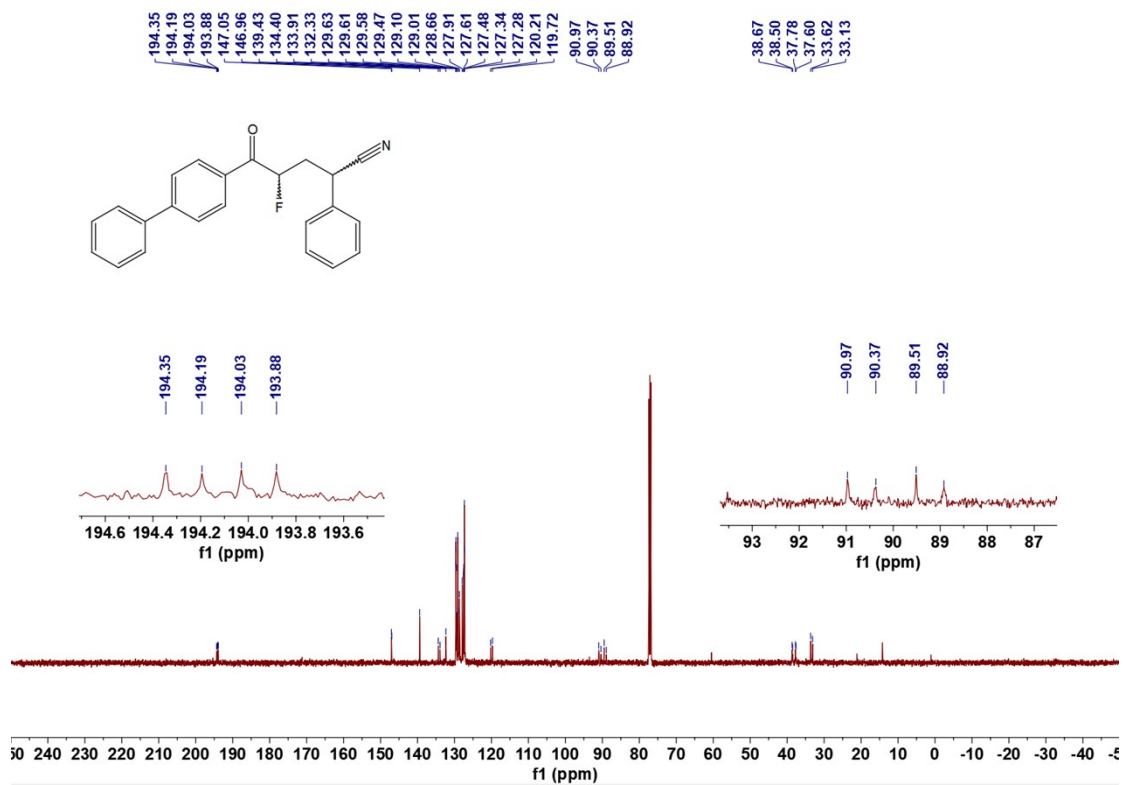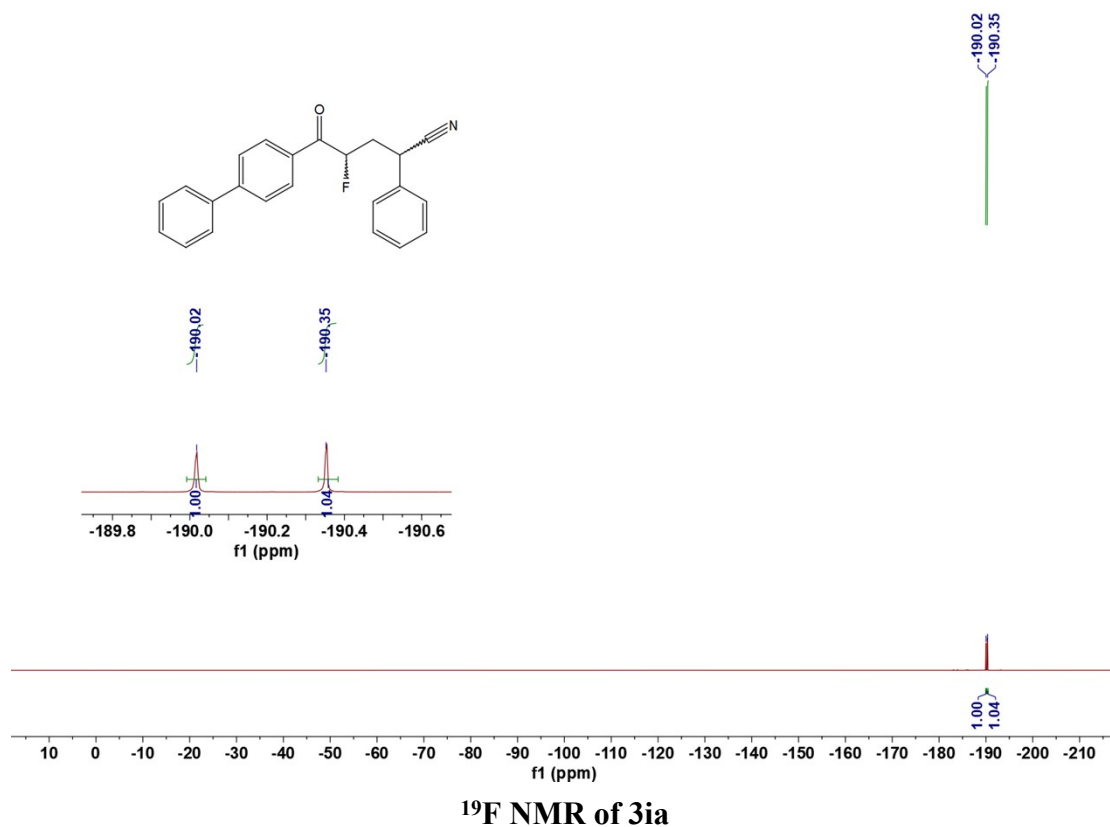

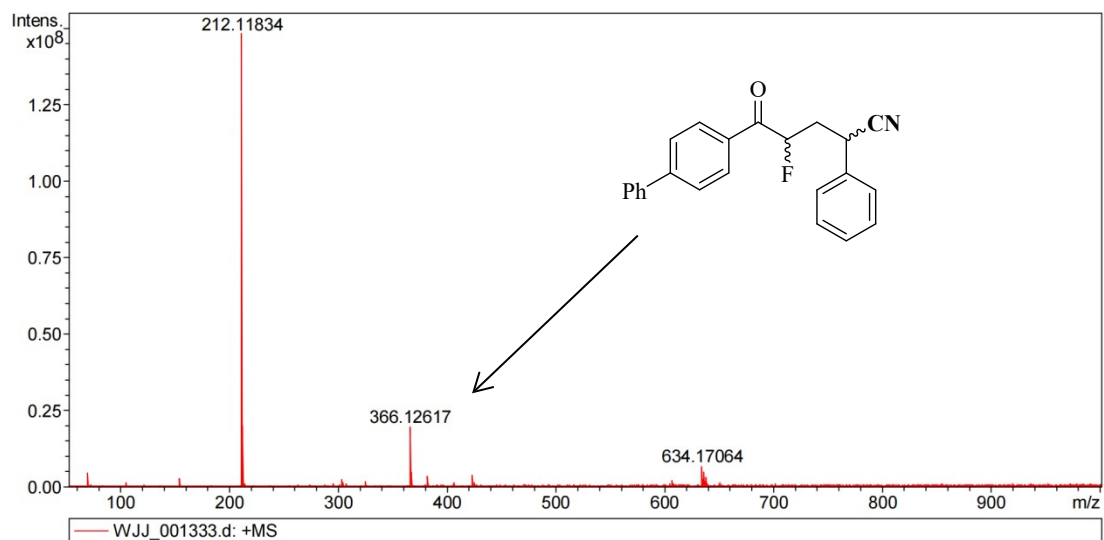

### HRMS of 3ia

8.47  
8.45  
8.04  
8.02  
7.99  
7.89  
7.88  
7.86  
7.61  
7.59  
7.58  
7.55  
7.53  
7.51  
7.49  
7.41  
7.39  
7.38  
7.33  
6.04  
6.02  
6.01  
5.92  
5.91  
5.89  
5.87  
5.47  
5.46  
5.45  
5.44  
5.35  
5.34  
5.32  
5.32  
4.21  
4.20  
4.18  
4.17  
4.08  
4.07  
4.06  
4.04  
2.73  
2.72  
2.70  
2.68  
2.67  
2.66  
2.64  
2.62  
2.61  
2.60  
2.59  
2.58  
2.57  
2.53  
2.51  
2.50  
2.47  
2.44  
2.42  
2.40  
2.38

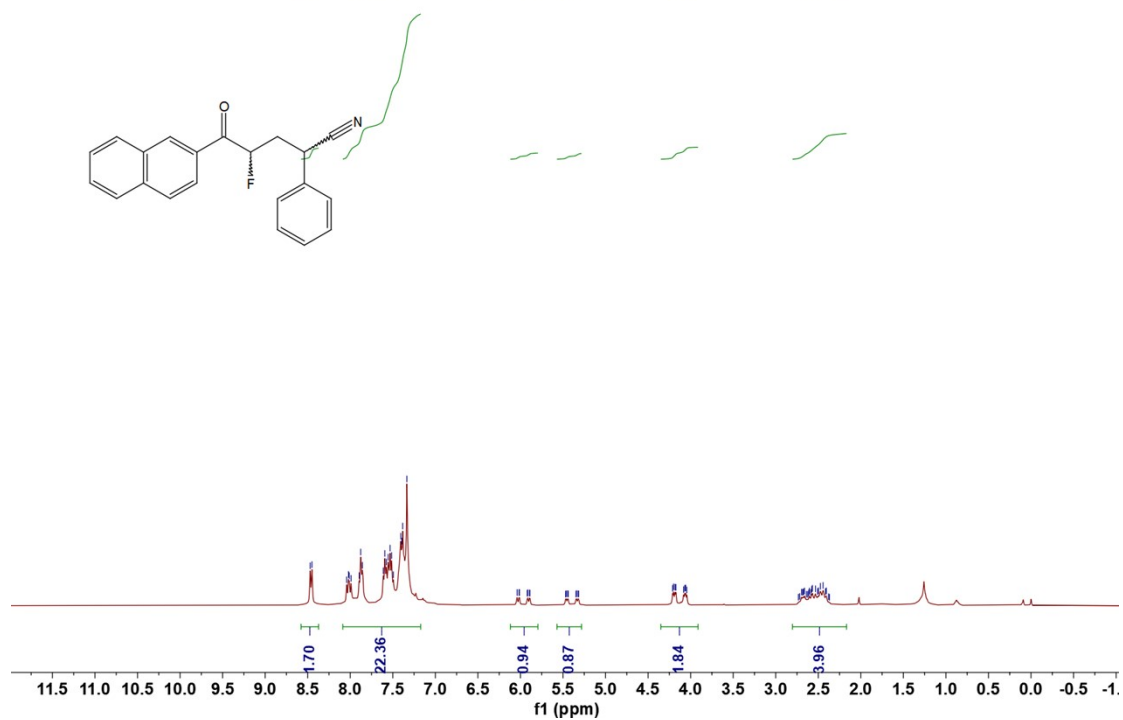

### <sup>1</sup>H NMR of 3ja

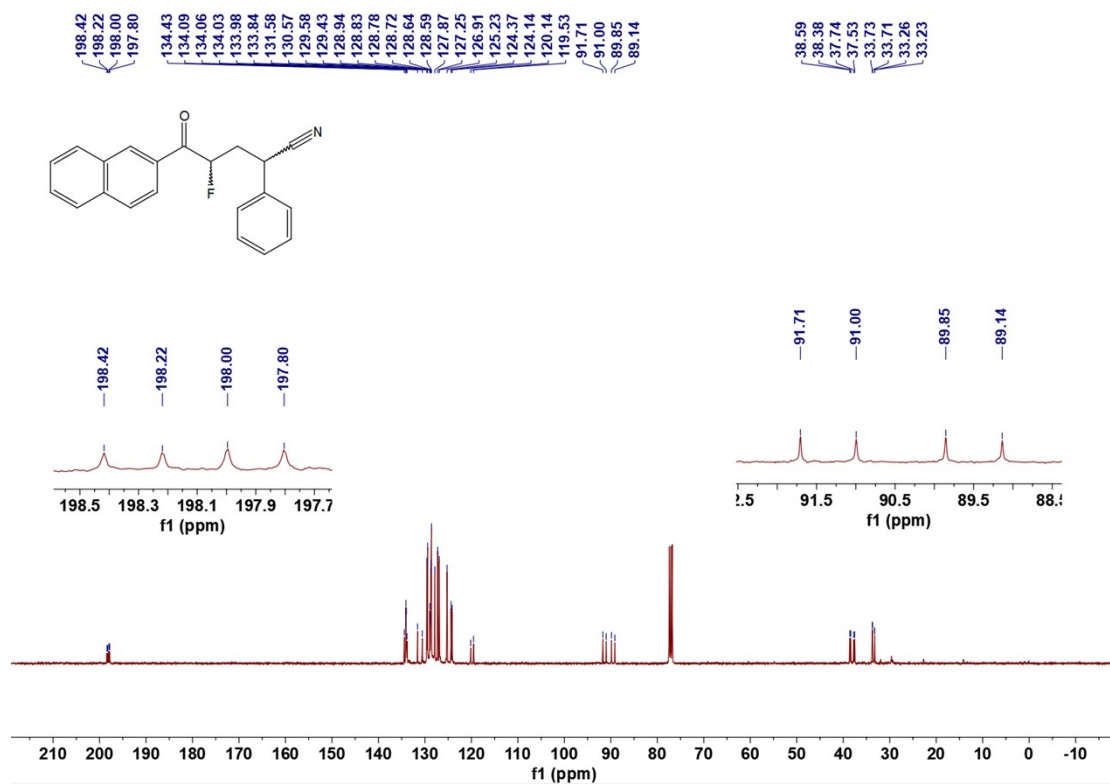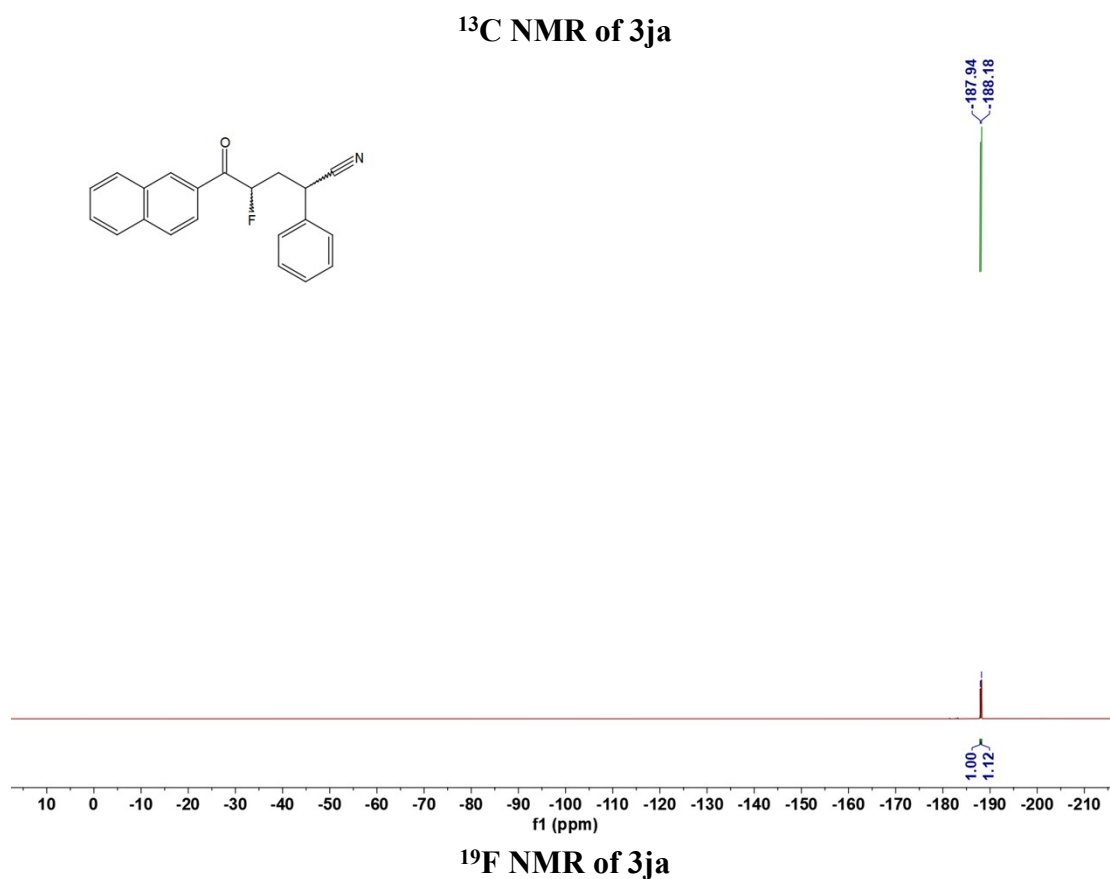

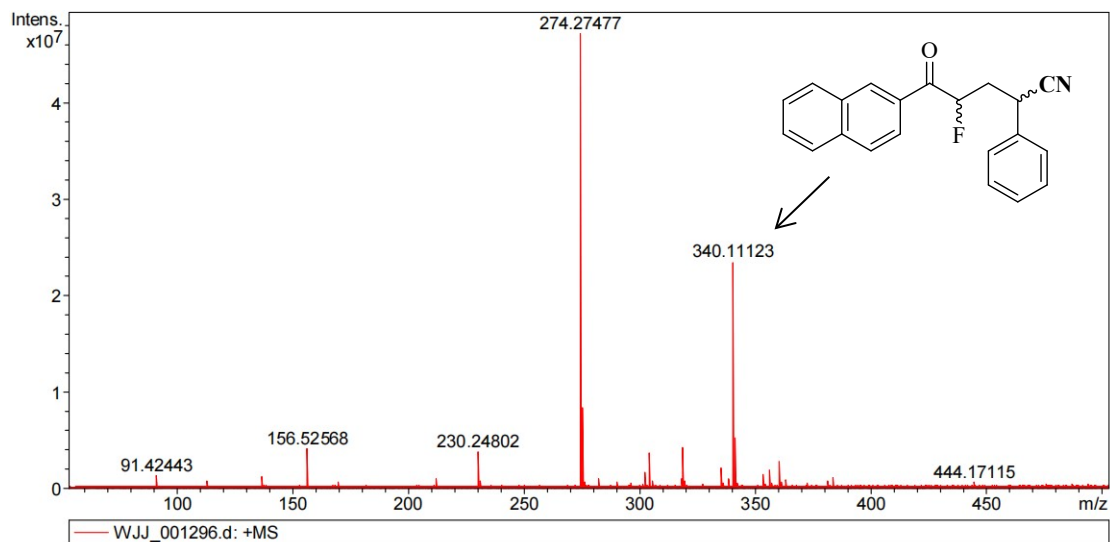

### HRMS of 3ja

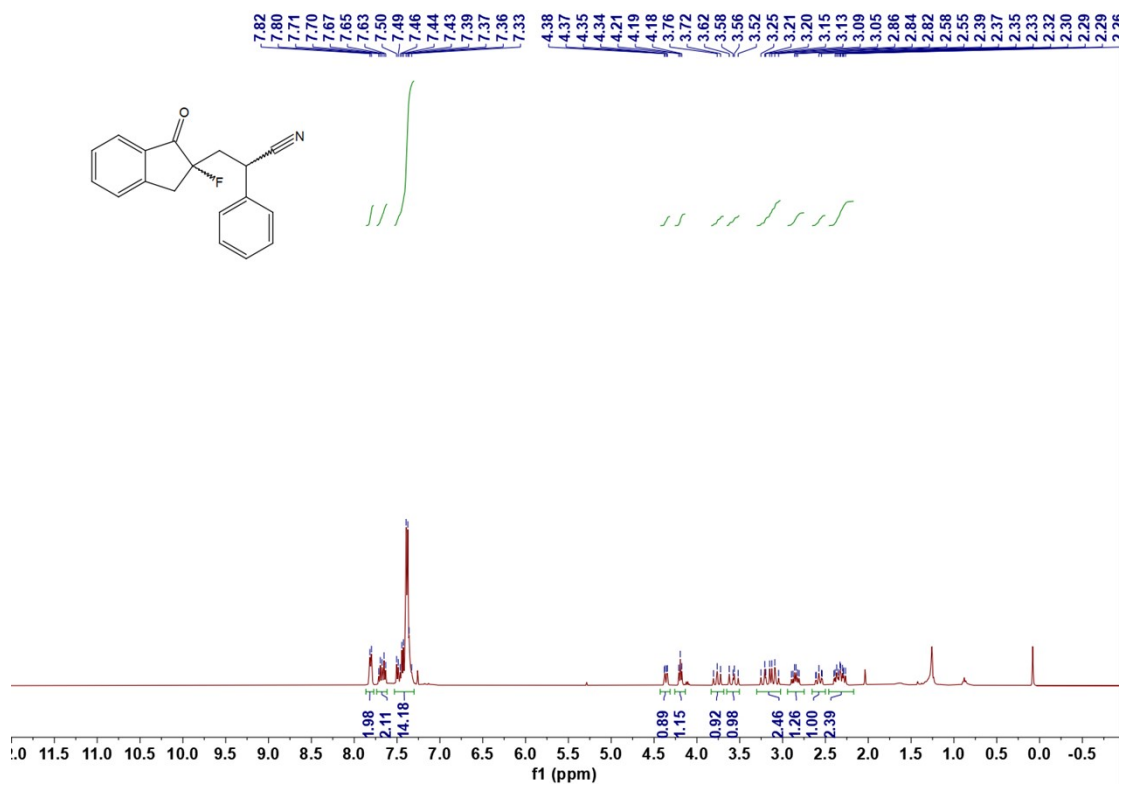

### <sup>1</sup>H NMR of 3ka

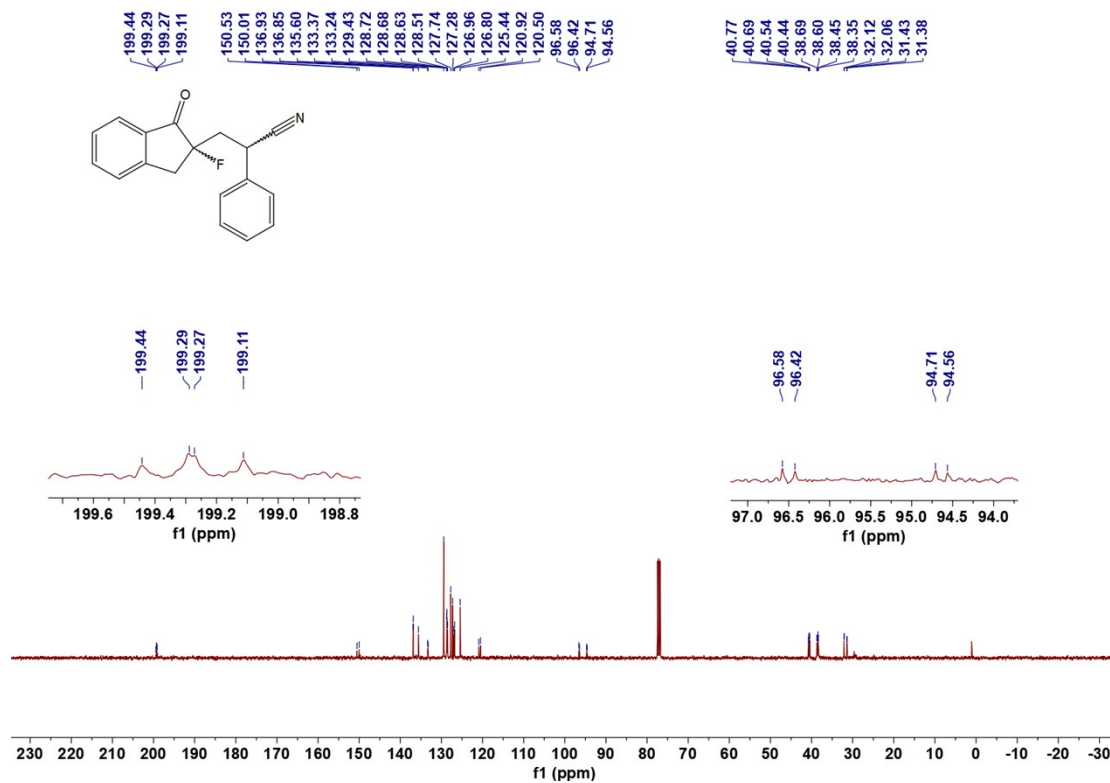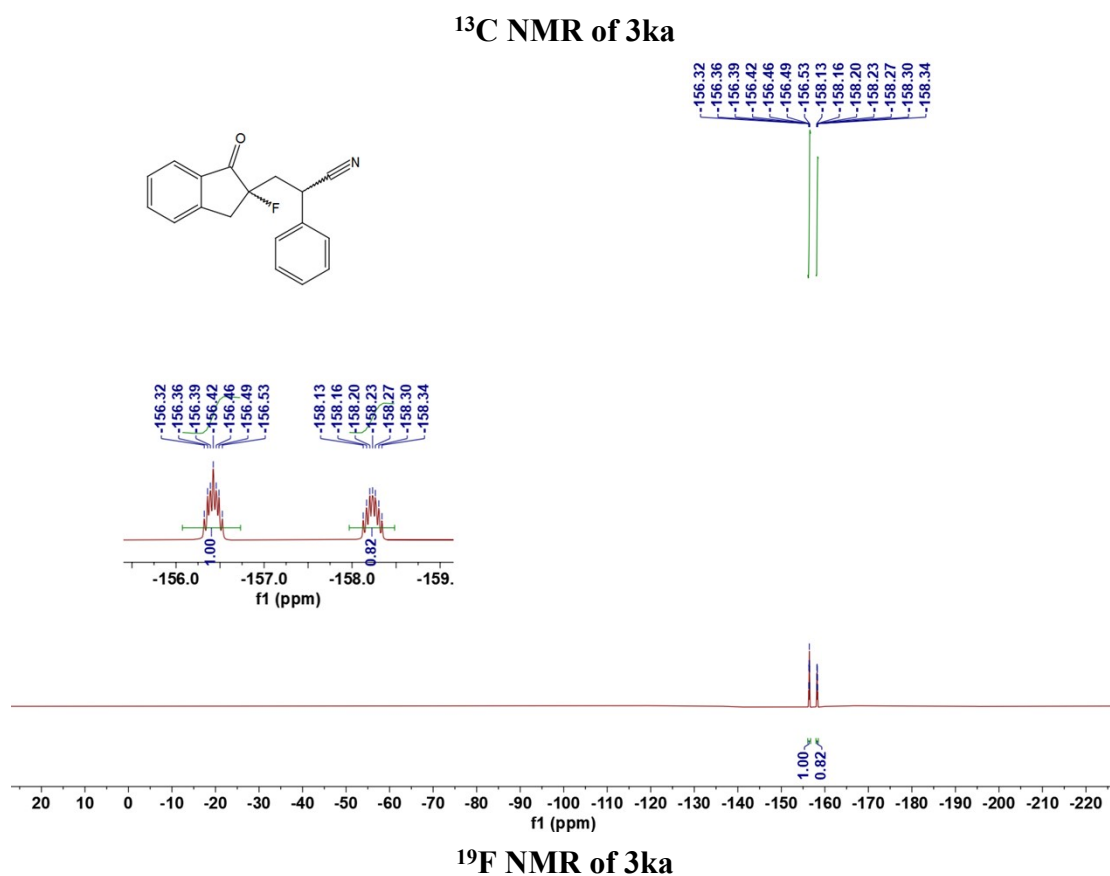

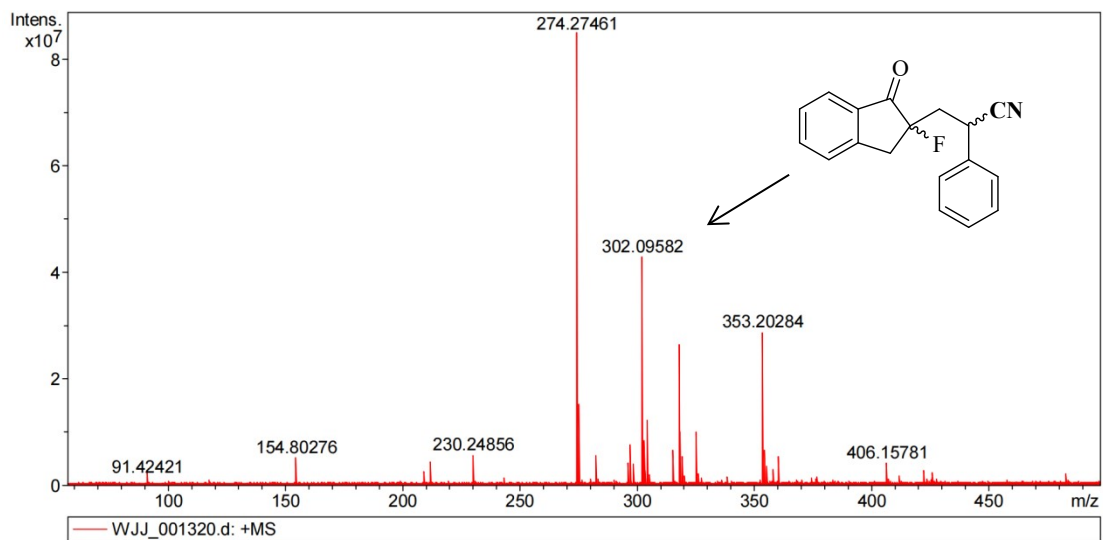

### HRMS of 3ka

7.69  
7.65  
7.64  
7.64  
7.45  
7.45  
7.44  
7.43  
7.43  
7.42  
7.41  
7.40  
7.39  
7.38  
7.37  
7.36  
7.35  
7.35  
7.34  
7.34  
7.33  
6.61  
6.60  
6.60  
6.58  
6.58  
6.57  
5.71  
5.70  
5.67  
5.58  
5.58  
5.56  
5.55  
5.15  
5.05  
4.19  
4.18  
4.17  
4.15  
4.09  
4.08  
4.07  
4.05  
2.65  
2.64  
2.63  
2.61  
2.61  
2.61  
2.60  
2.58  
2.57  
2.52  
2.51  
2.49  
2.42  
2.41  
2.39  
2.38

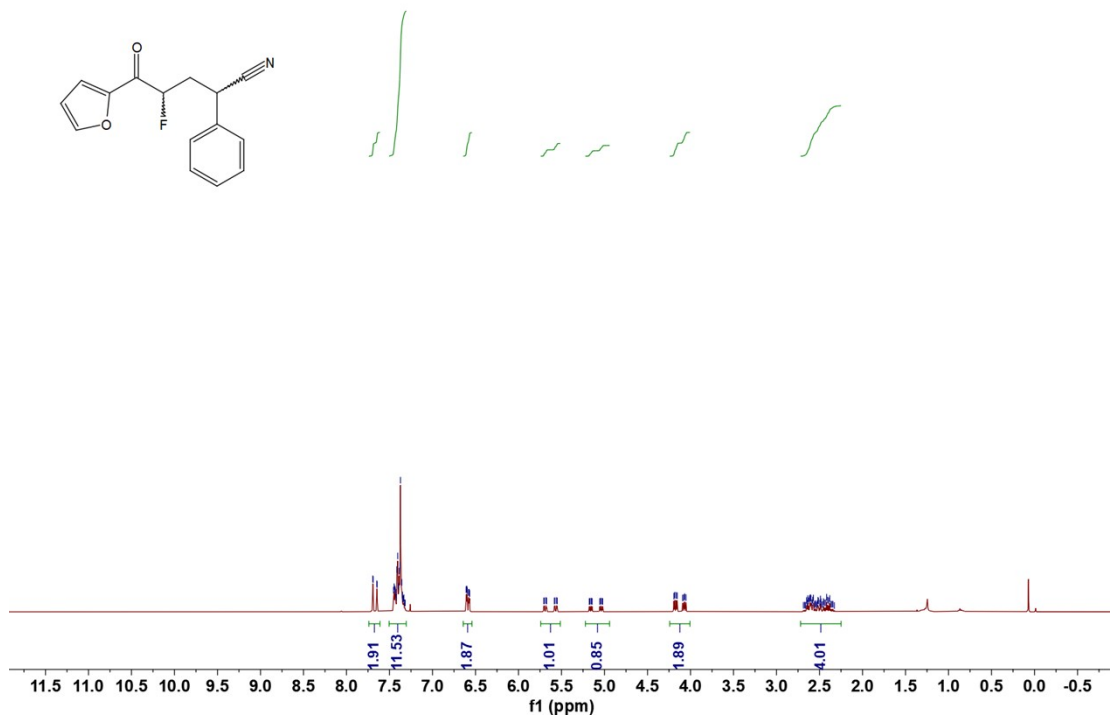

### <sup>1</sup>H NMR of 3la

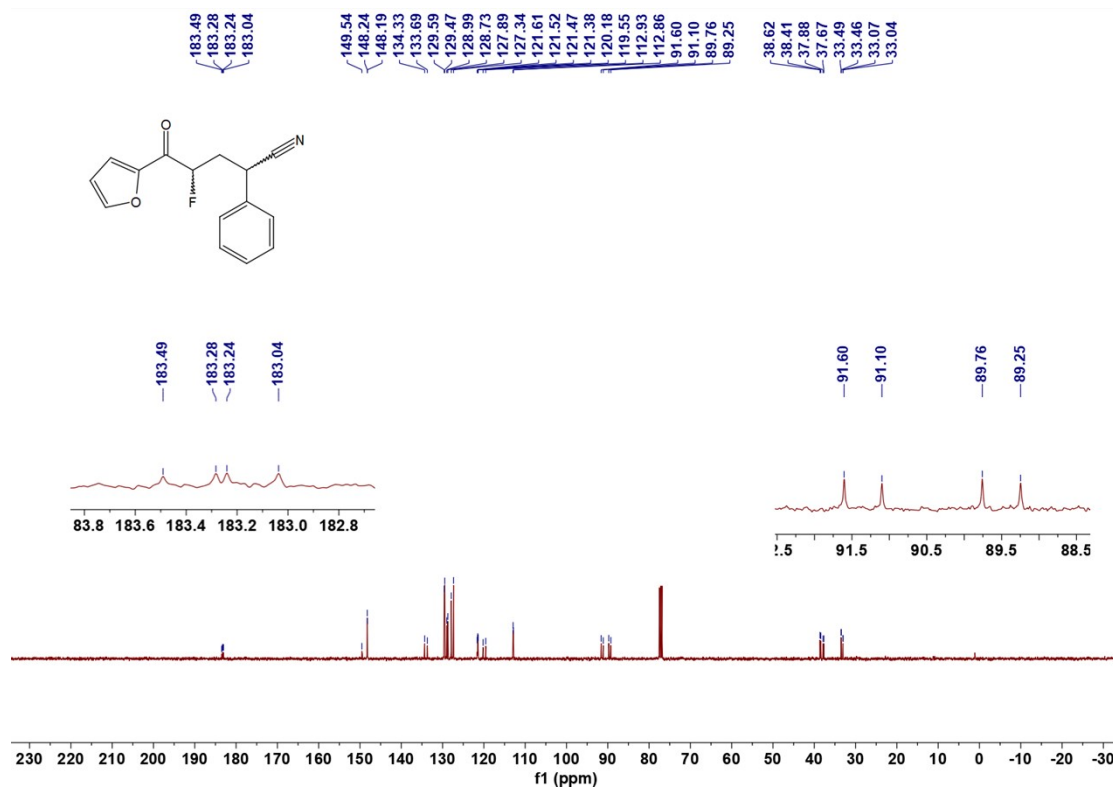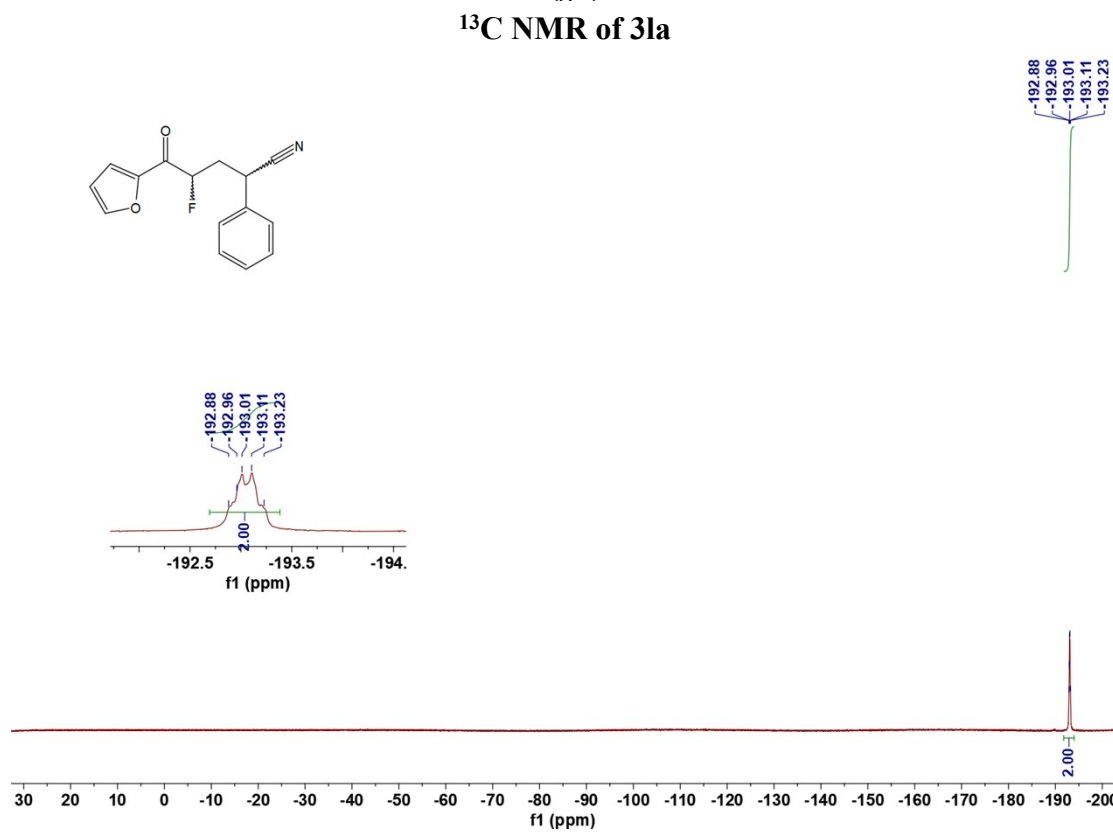

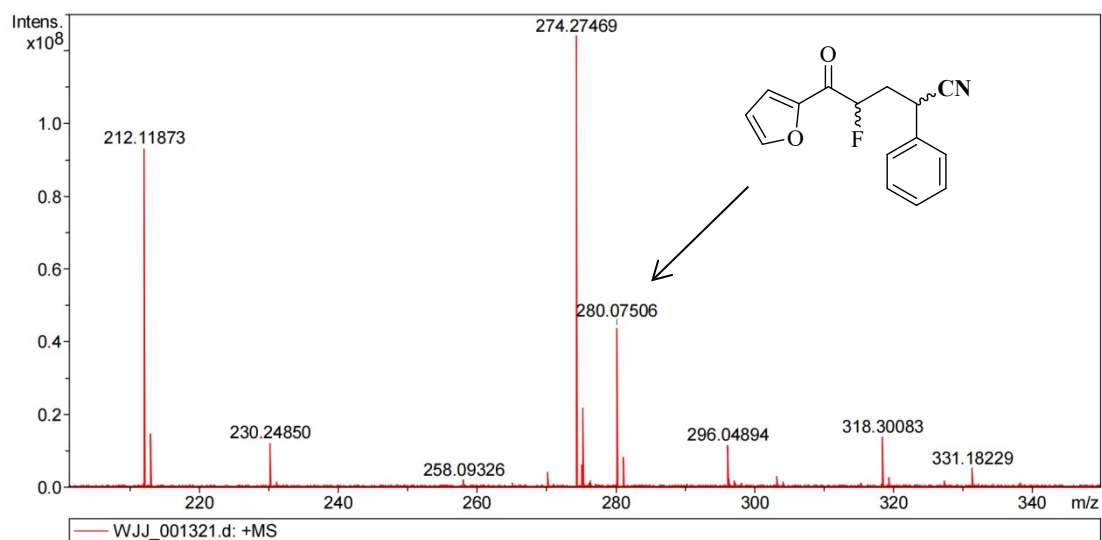

### HRMS of 3la

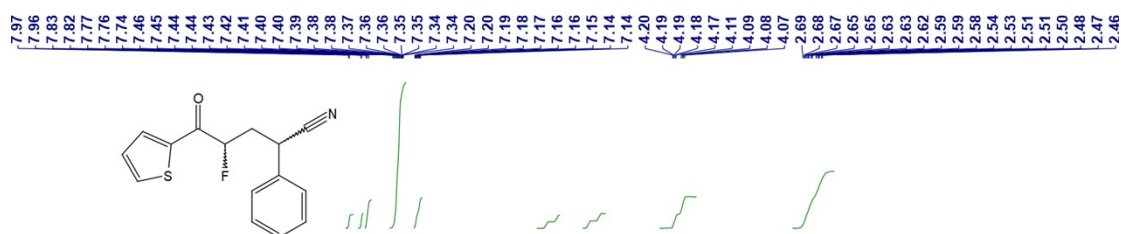

### <sup>1</sup>H NMR of 3ma



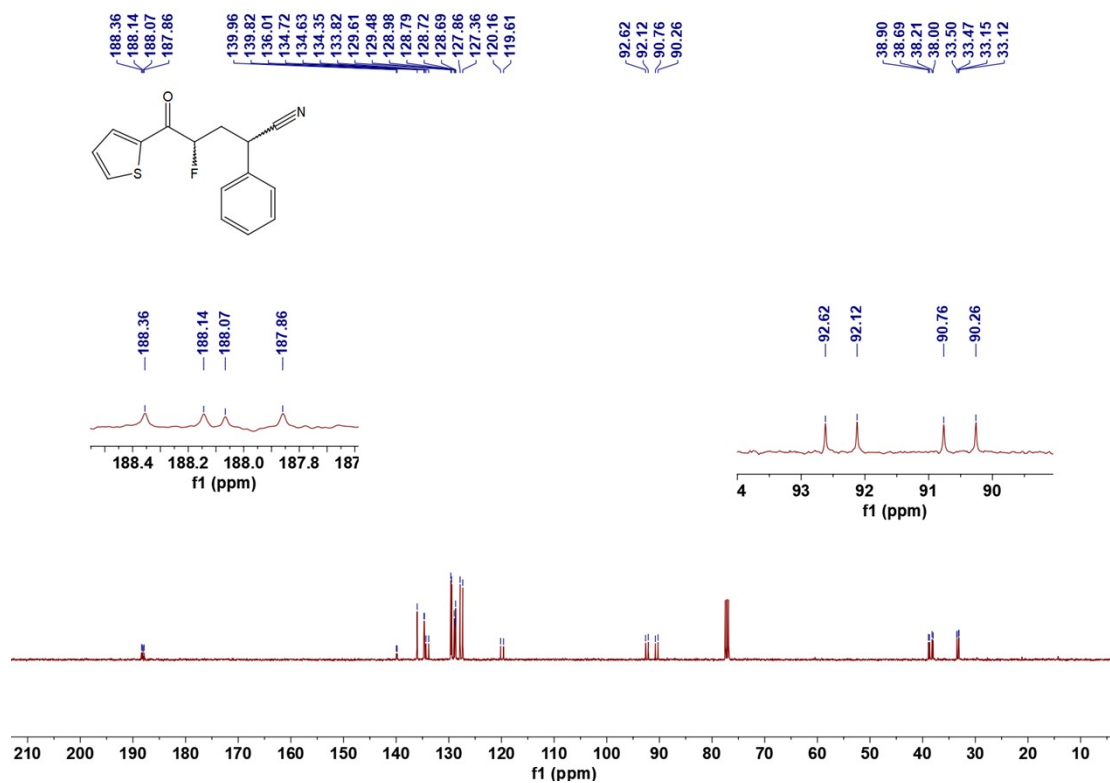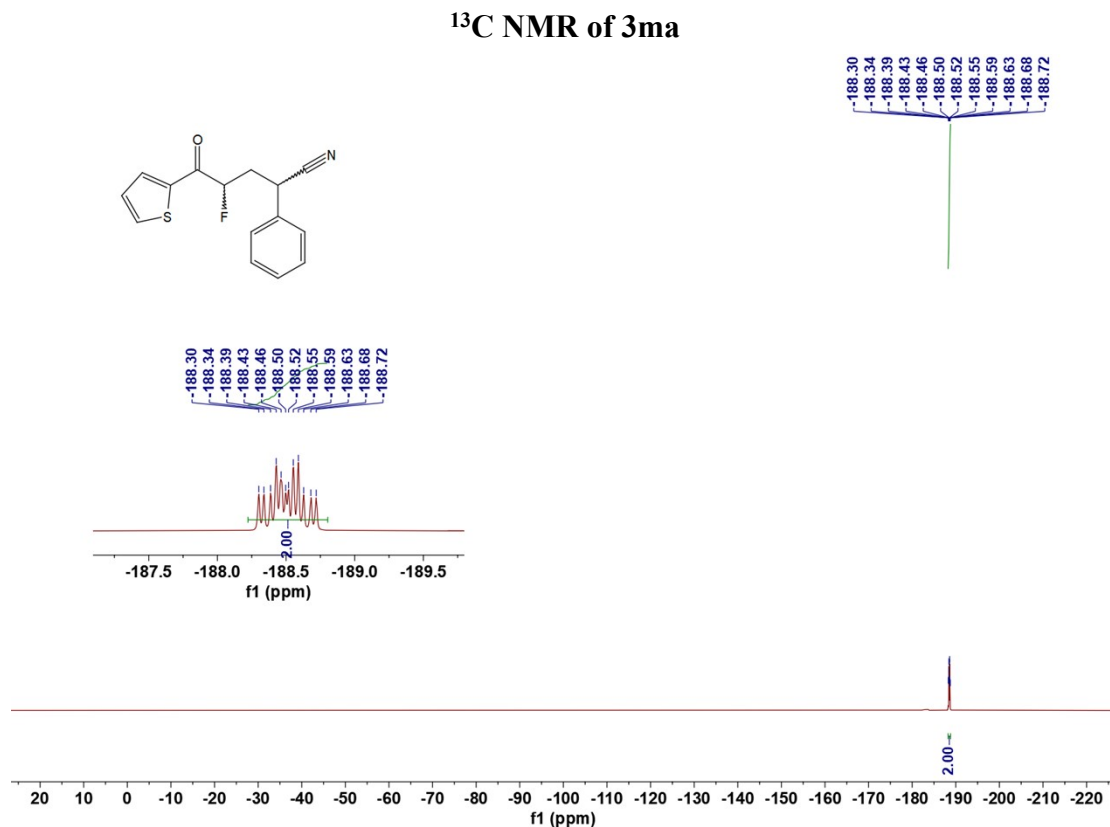

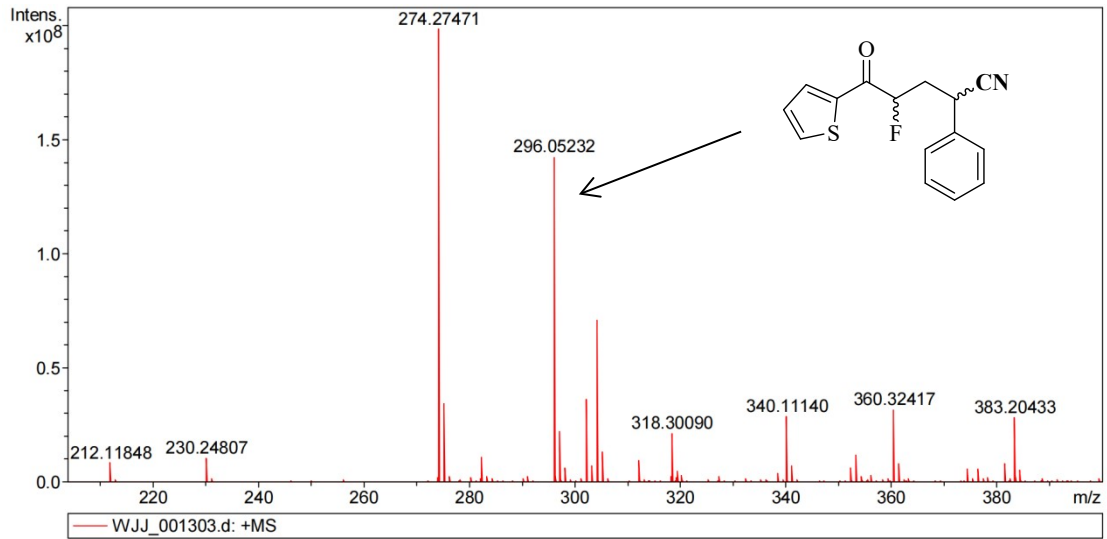

### HRMS of 3ma

8.13  
8.01  
7.99  
7.94  
7.87  
7.86  
7.85  
7.85  
7.84  
7.84  
7.83  
7.82  
7.79  
7.60  
7.59  
7.58  
7.57  
7.51  
7.50  
7.49  
7.49  
7.48  
7.47  
7.46  
7.46  
7.45  
7.45  
7.43  
7.43  
7.42  
7.42  
7.42  
7.41  
7.41  
7.40  
7.39  
7.38  
7.38  
7.37  
7.36  
7.35  
7.35  
7.34  
7.34  
4.26  
4.25  
4.24  
4.23  
4.23  
4.15  
4.13  
4.12  
4.11  
4.10  
4.10  
3.95  
3.90  
2.72  
2.70  
2.69  
2.60  
2.59  
2.52  
2.52  
2.50  
2.50

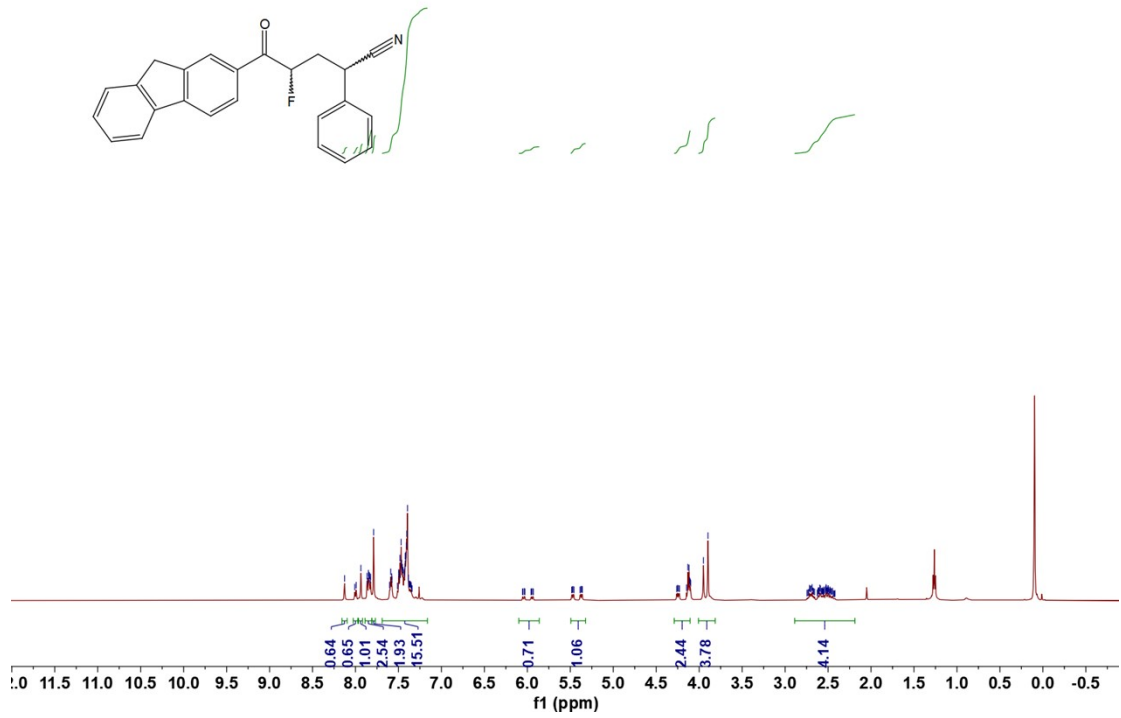

### <sup>1</sup>H NMR of 3na

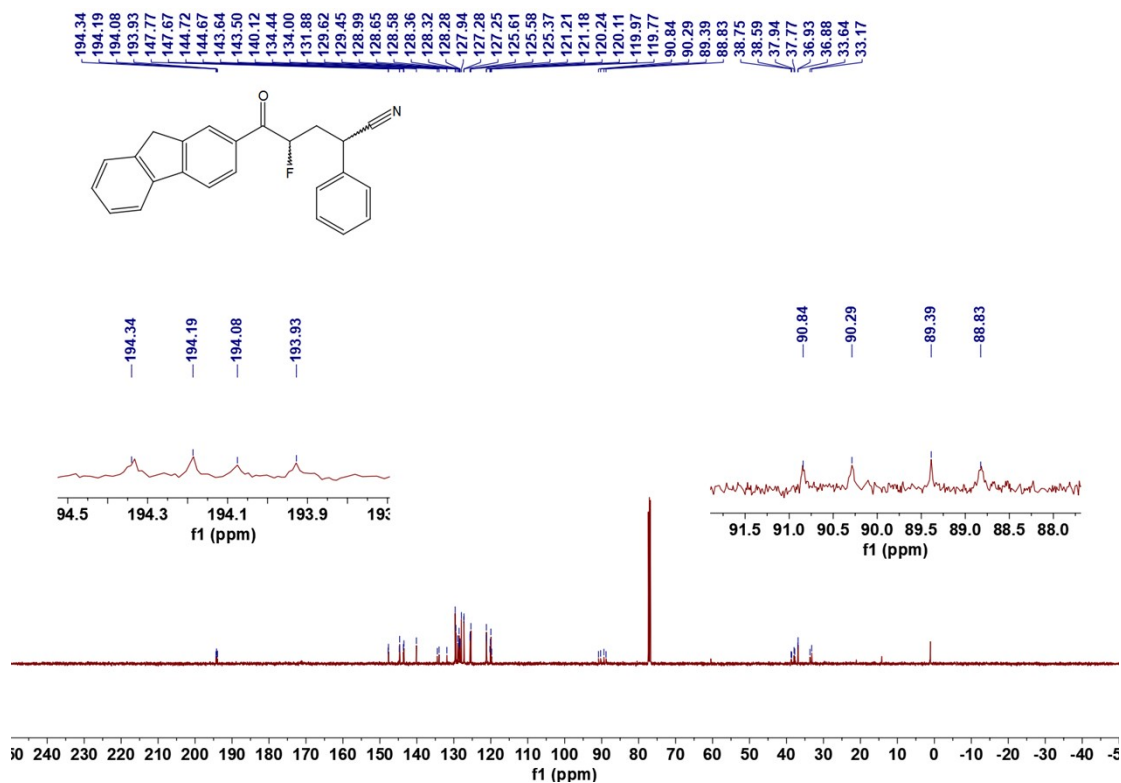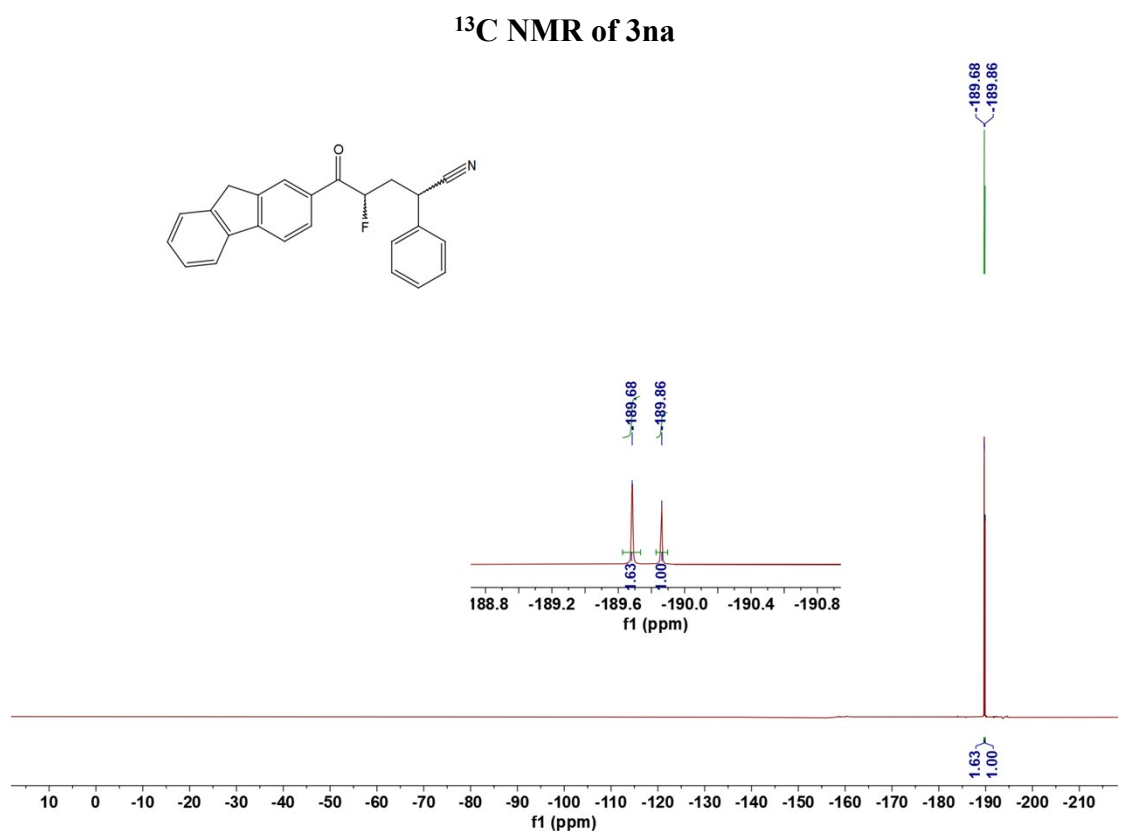

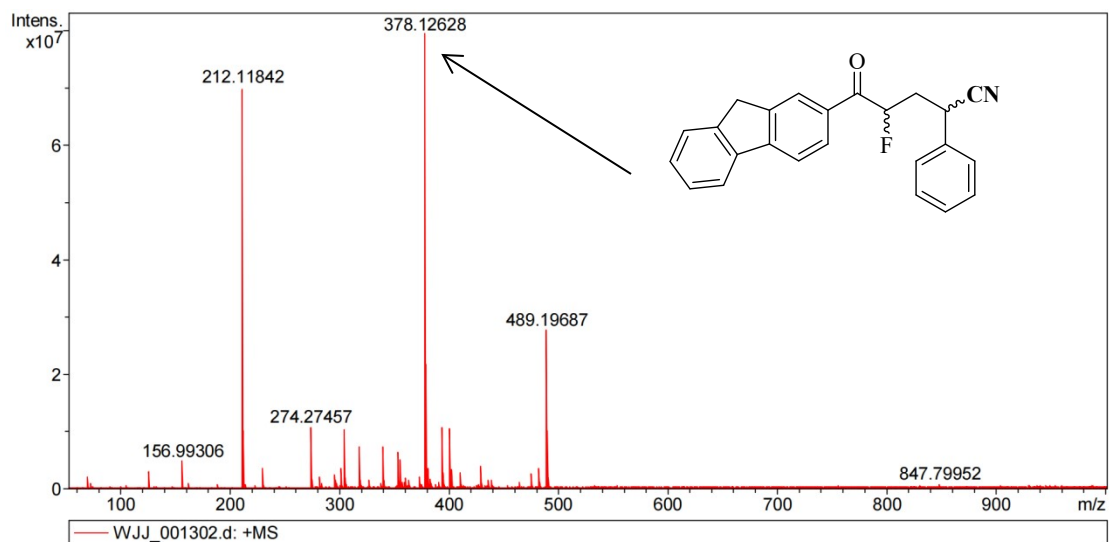

### HRMS of 3na

8.02  
8.00  
7.85  
7.83  
7.70  
7.68  
7.66  
7.66  
7.65  
7.63  
7.63  
7.62  
7.57  
7.55  
7.54  
7.53  
7.52  
7.51  
7.51  
7.50  
7.49  
7.48  
7.47  
7.36  
7.35  
7.34  
7.33  
7.32  
7.32  
7.31  
7.29  
7.28  
7.27  
7.26  
7.25  
7.24  
7.23  
6.08  
4.44  
4.43  
4.41  
4.40  
4.36  
4.34  
4.34  
4.32  
4.28  
2.67  
2.67  
2.66  
2.65  
2.64  
2.61  
2.58  
2.57  
2.47  
2.39  
2.36  
2.32

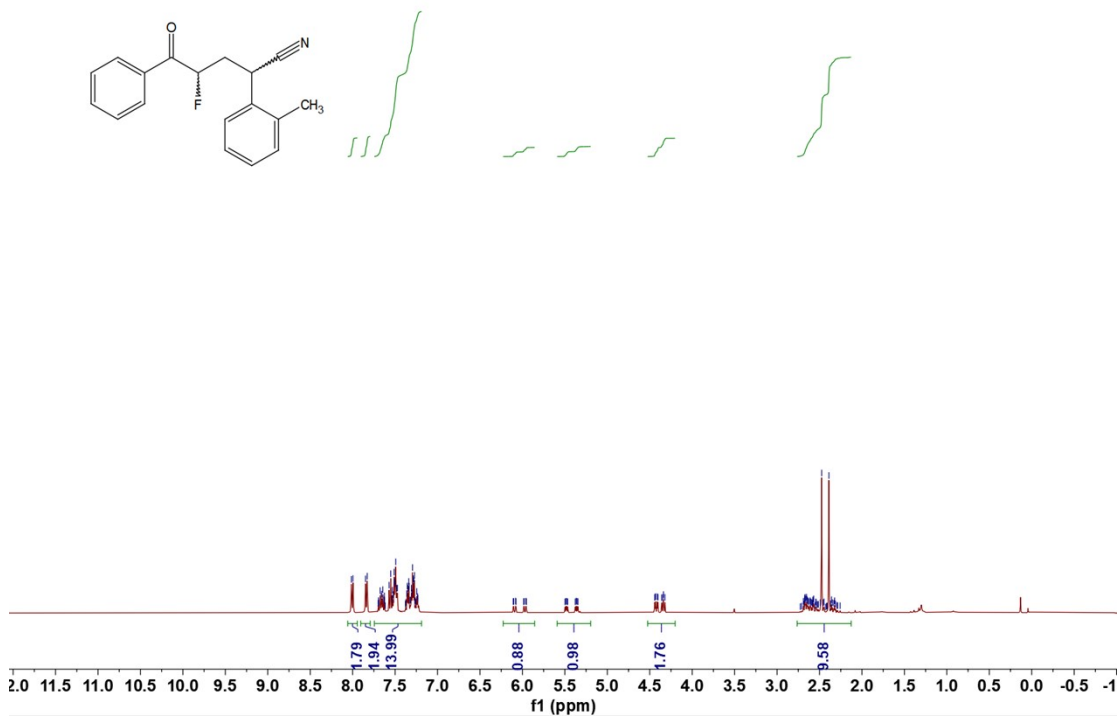

### <sup>1</sup>H NMR of 3ab

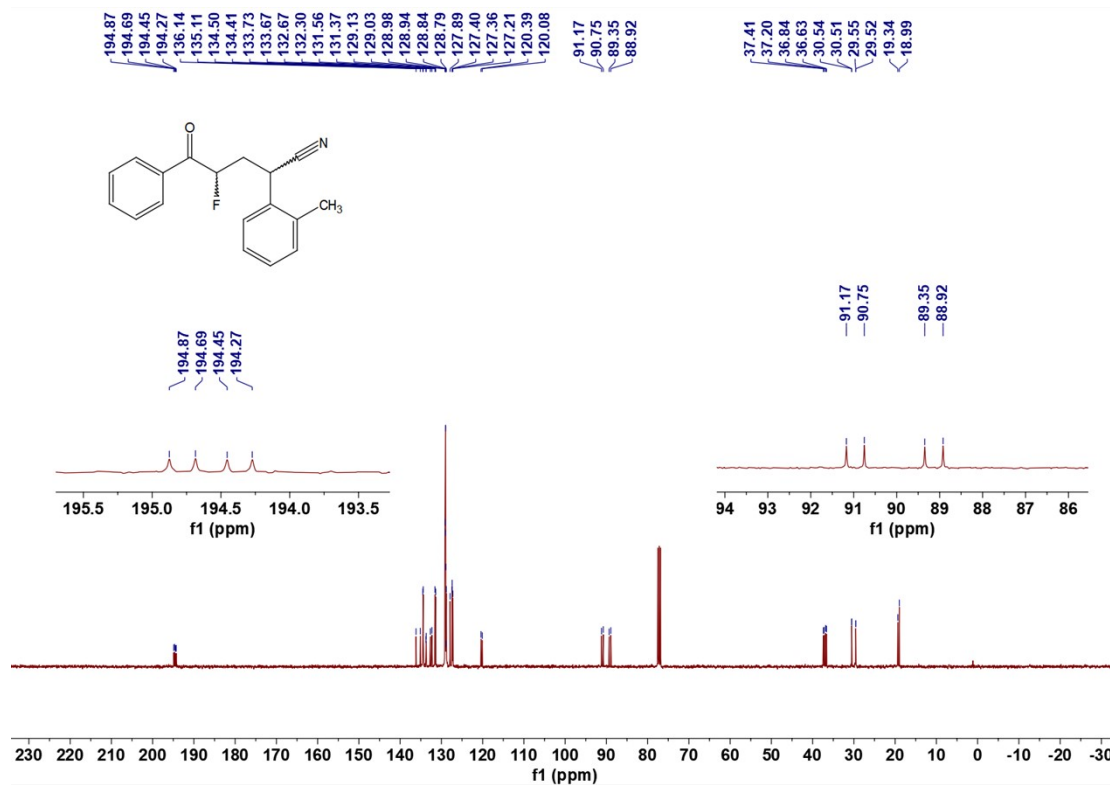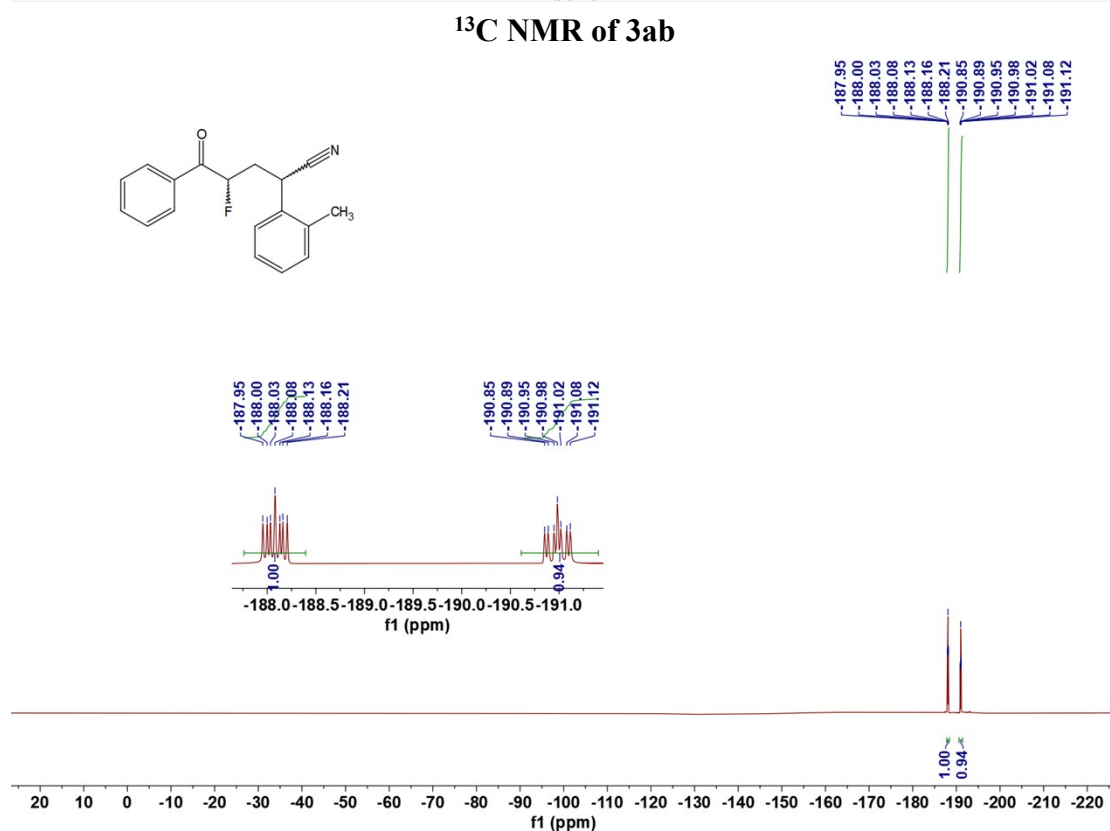

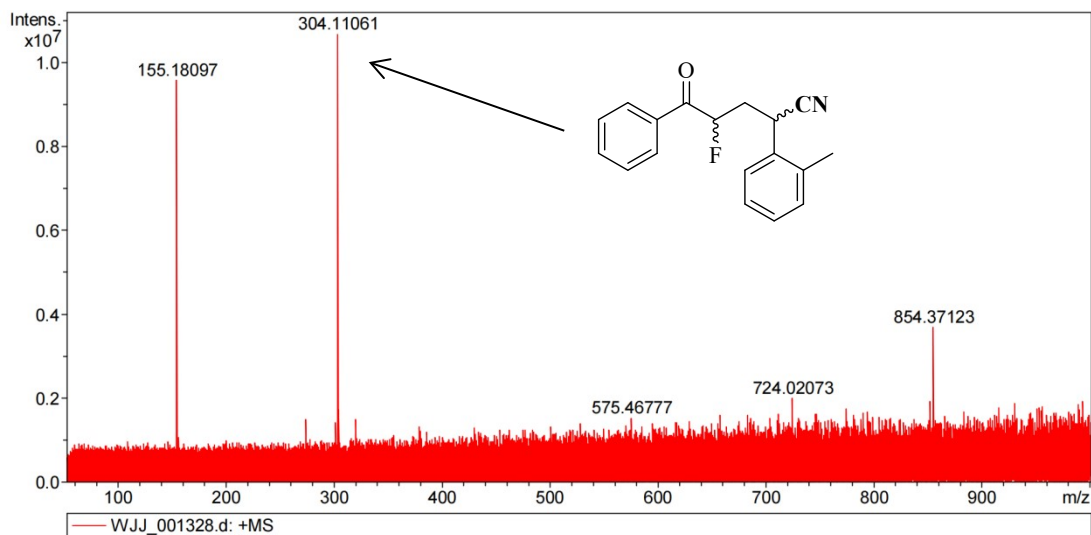

### HRMS of 3ab

8.01  
7.99  
7.83  
7.81  
7.67  
7.66  
7.65  
7.65  
7.64  
7.62  
7.62  
7.57  
7.56  
7.56  
7.55  
7.55  
7.53  
7.52  
7.50  
7.48  
7.46  
7.40  
7.38  
7.36  
7.33  
7.31  
7.30  
7.29  
7.28  
7.28  
7.27  
7.26  
7.26  
7.25  
7.25  
7.24  
7.22  
7.22  
7.21  
7.20  
7.20  
7.19  
7.18  
7.18  
6.02  
5.90  
5.32  
4.23  
4.22  
4.21  
4.19  
4.10  
4.09  
4.08  
4.06  
2.60  
2.59  
2.51  
2.48  
2.47  
2.46  
2.44  
2.43  
2.42  
2.39

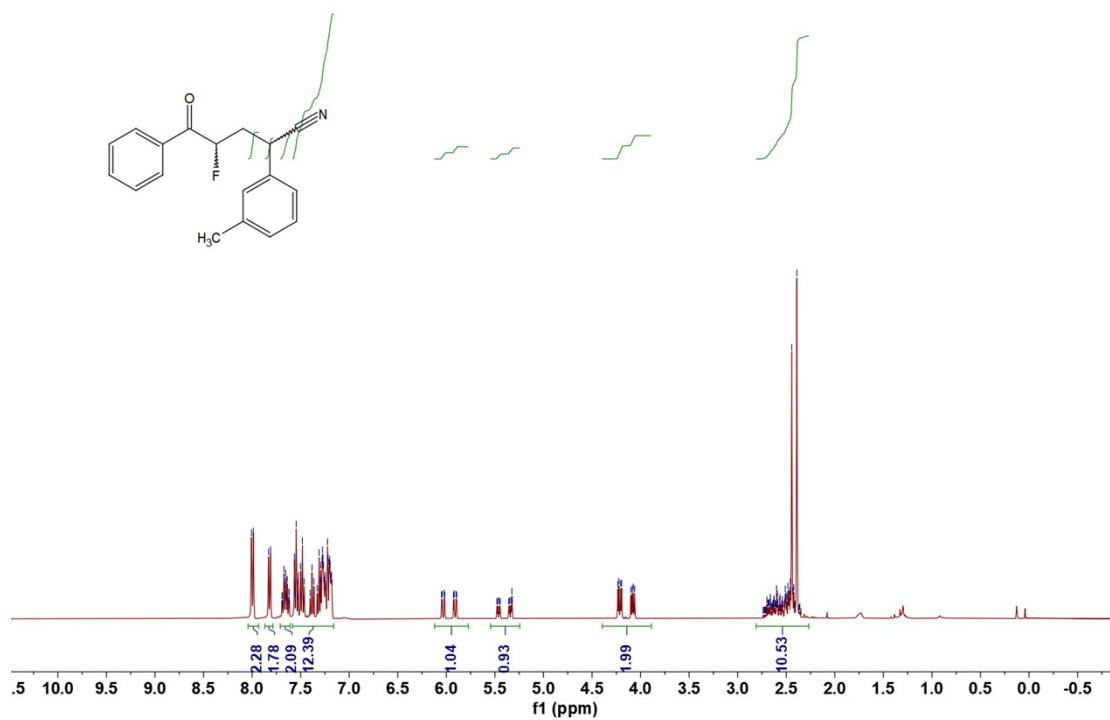

### <sup>1</sup>H NMR of 3ac

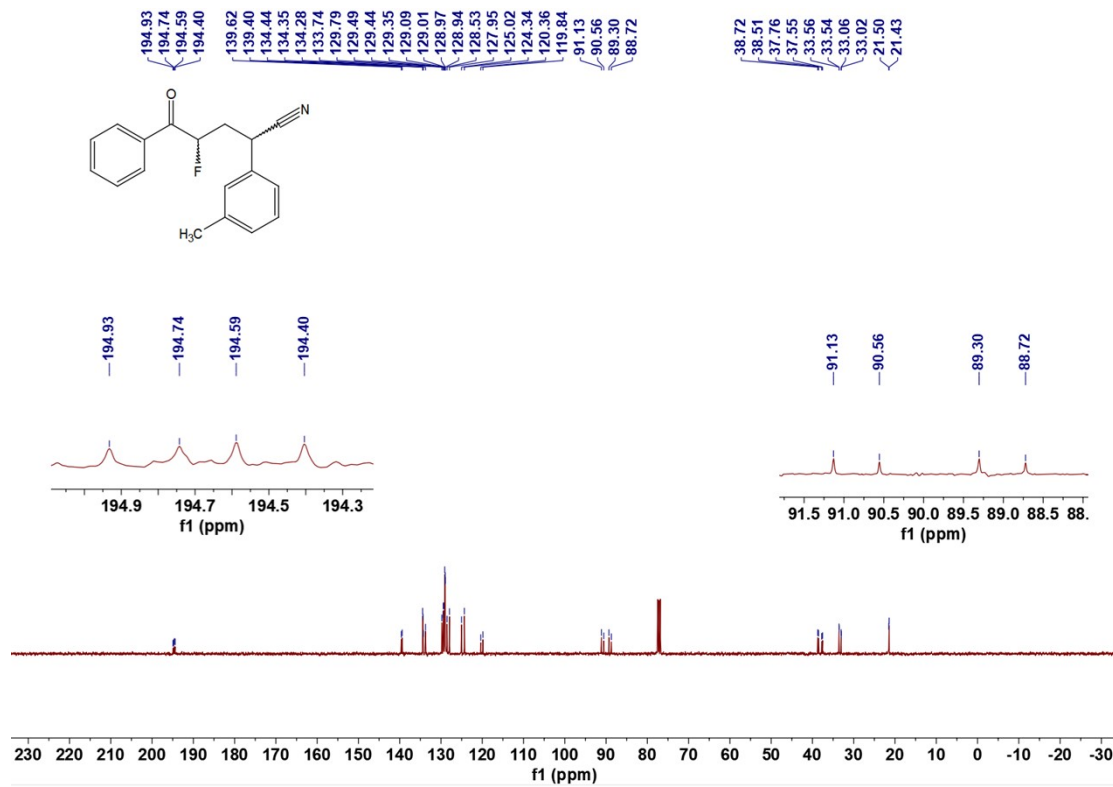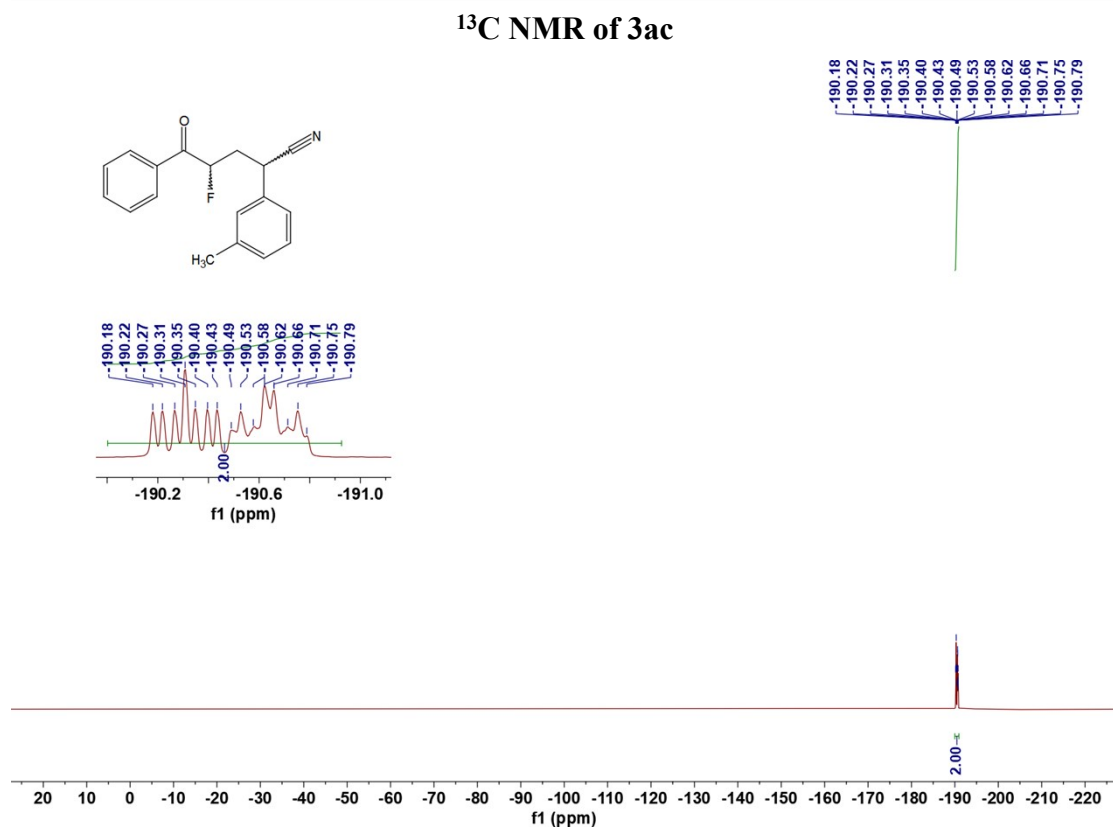

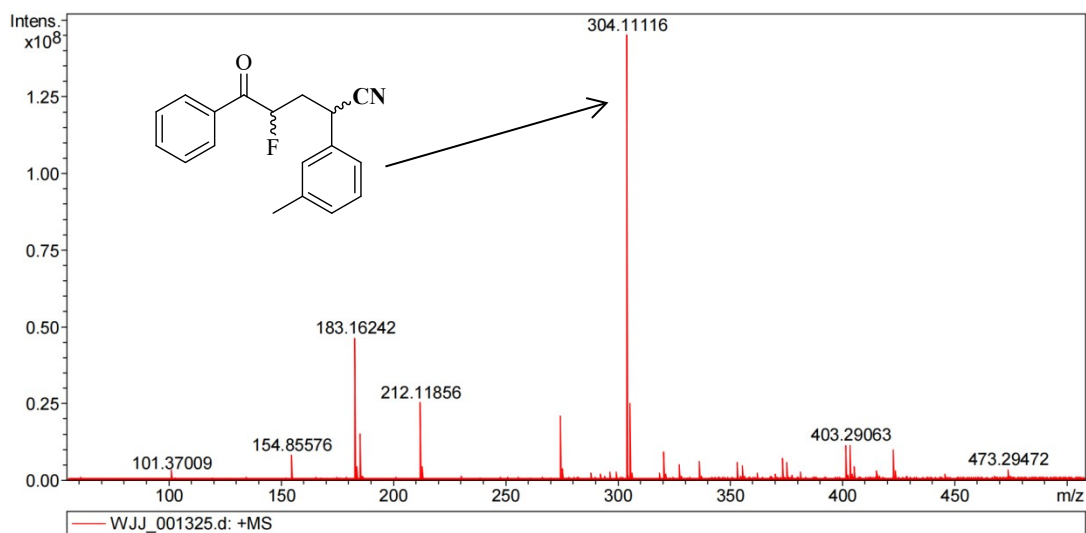

### HRMS of 3c

8.00  
7.98  
7.83  
7.81  
7.68  
7.67  
7.66  
7.65  
7.65  
7.64  
7.63  
7.62  
7.61  
7.56  
7.54  
7.52  
7.50  
7.48  
7.46  
7.46  
7.36  
7.35  
7.34  
7.31  
7.30  
7.29  
7.28  
7.28  
7.23  
7.21  
6.04  
6.03  
6.01  
6.01  
5.92  
5.89  
5.88  
4.23  
4.22  
4.21  
4.20  
4.10  
4.10  
4.09  
4.08  
4.07  
2.59  
2.58  
2.56  
2.50  
2.49  
2.48  
2.47  
2.47  
2.46  
2.45  
2.44  
2.42  
2.41  
2.40  
2.39  
2.38

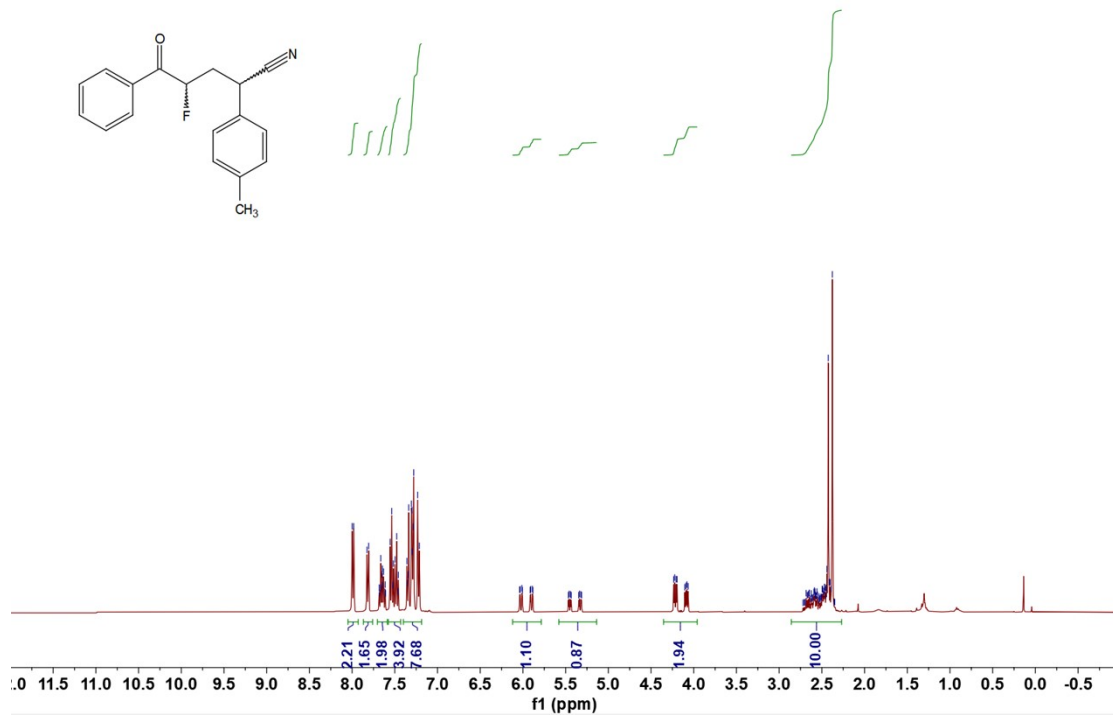

### <sup>1</sup>H NMR of 3d



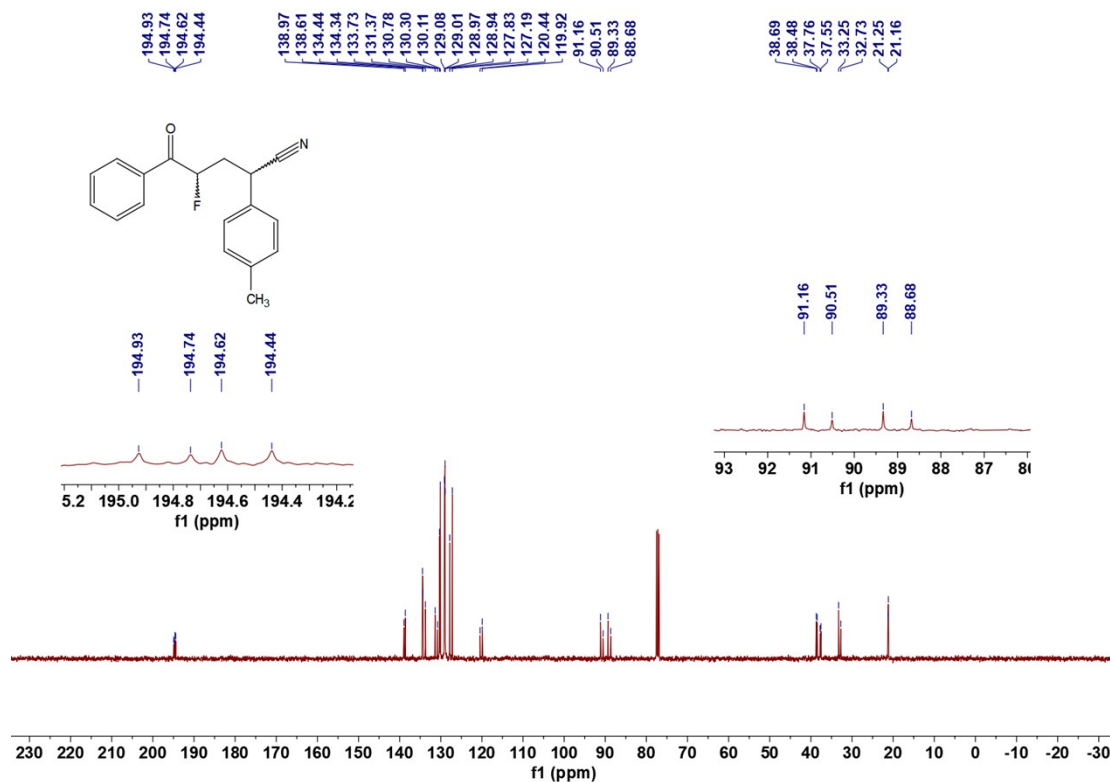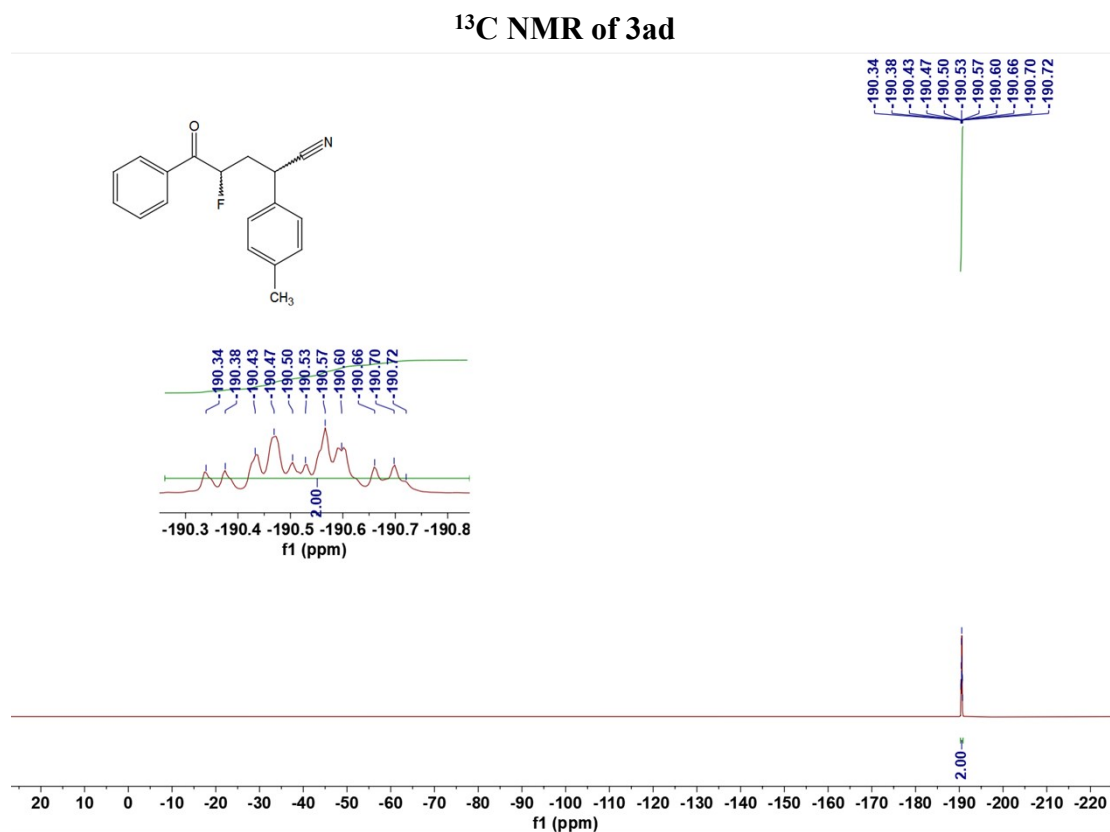

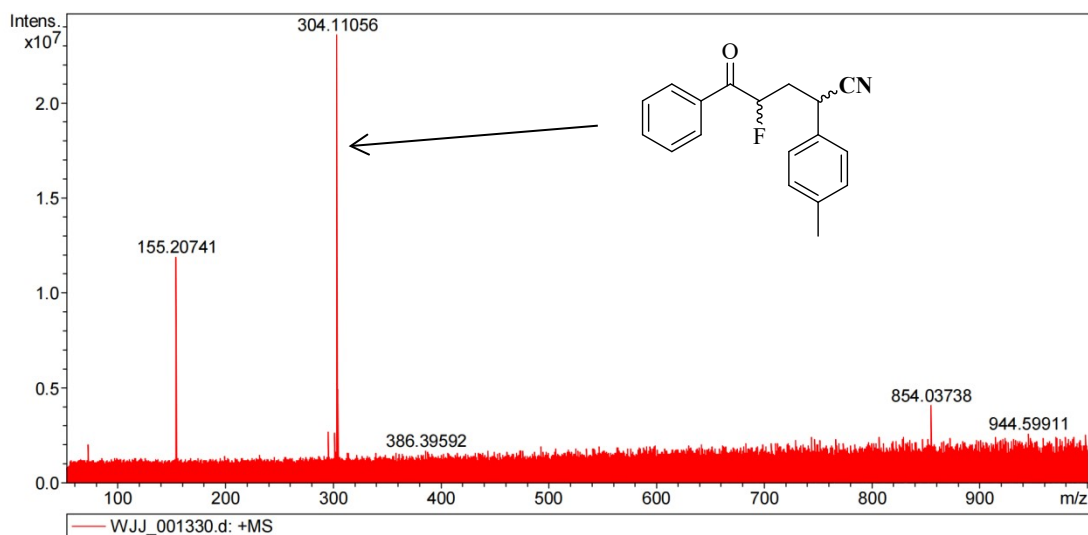

### HRMS of 3ad

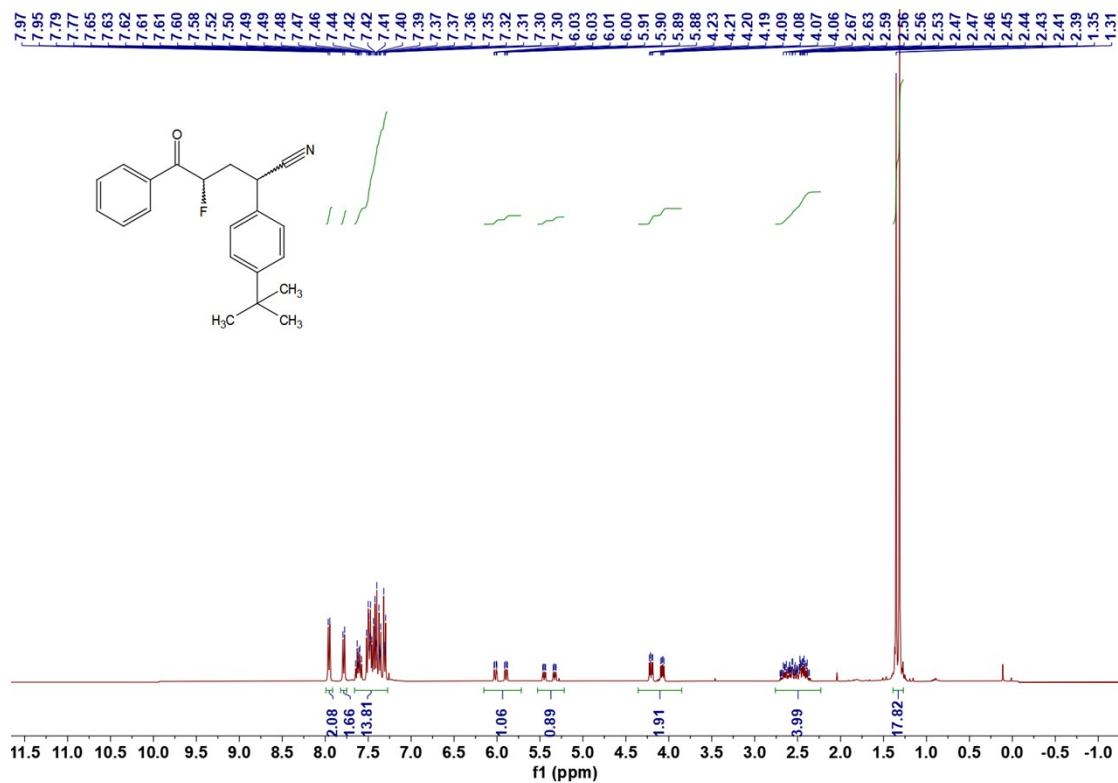

### <sup>1</sup>H NMR of 3ae

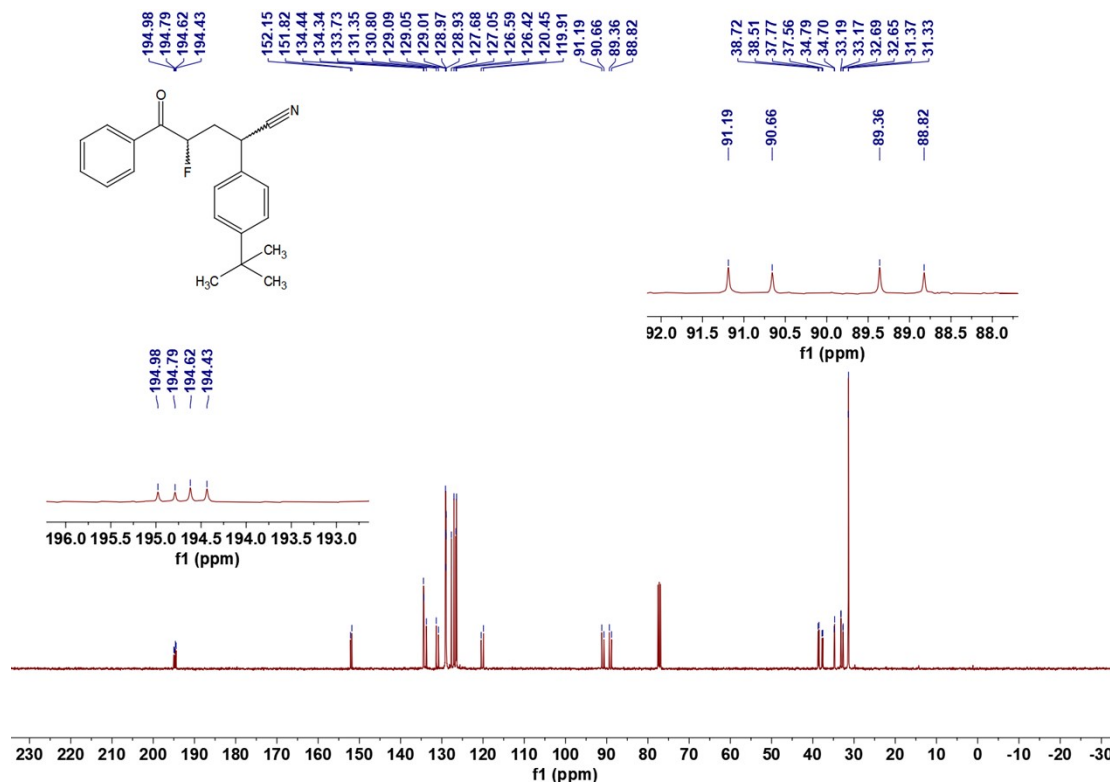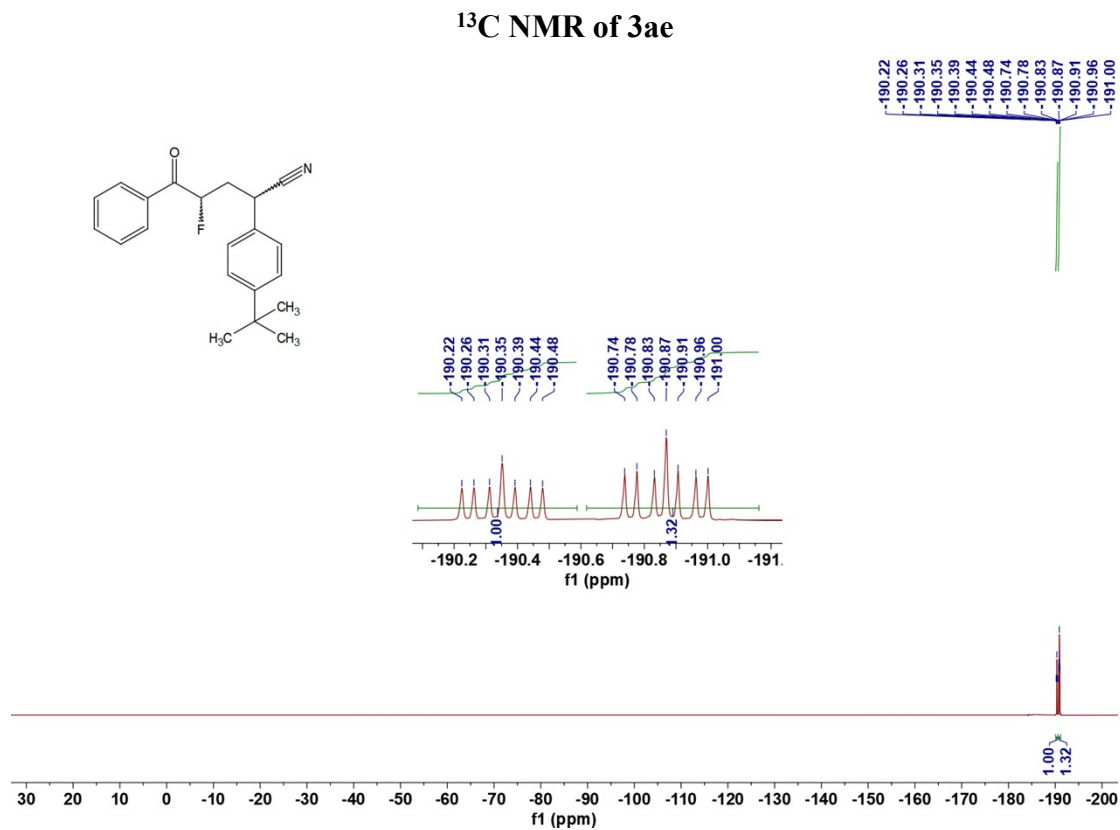

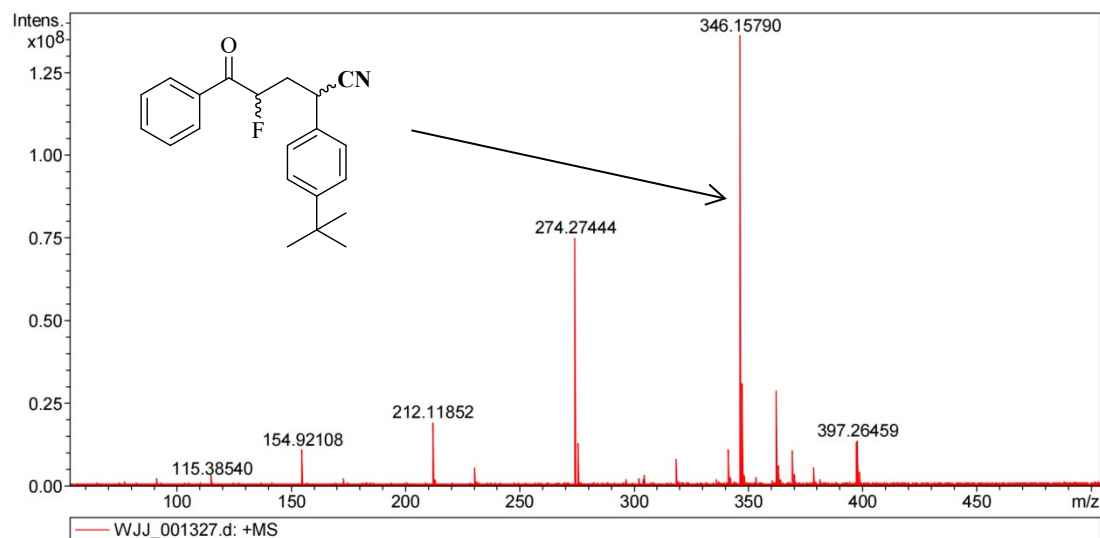

HRMS of 3ae

7.99  
7.97  
7.83  
7.82  
7.70  
7.69  
7.68  
7.67  
7.65  
7.64  
7.63  
7.62  
7.61  
7.61  
7.60  
7.59  
7.59  
7.58  
7.58  
7.57  
7.57  
7.56  
7.56  
7.54  
7.54  
7.52  
7.50  
7.49  
7.48  
7.46  
7.44  
7.42  
7.42  
7.41  
7.40  
7.40  
7.39  
7.38  
7.36  
6.05  
6.03  
5.93  
5.91  
5.90  
4.30  
4.28  
4.27  
4.26  
4.17  
4.16  
4.15  
4.13  
2.62  
2.53  
2.53  
2.51  
2.50  
2.49  
2.47  
2.45

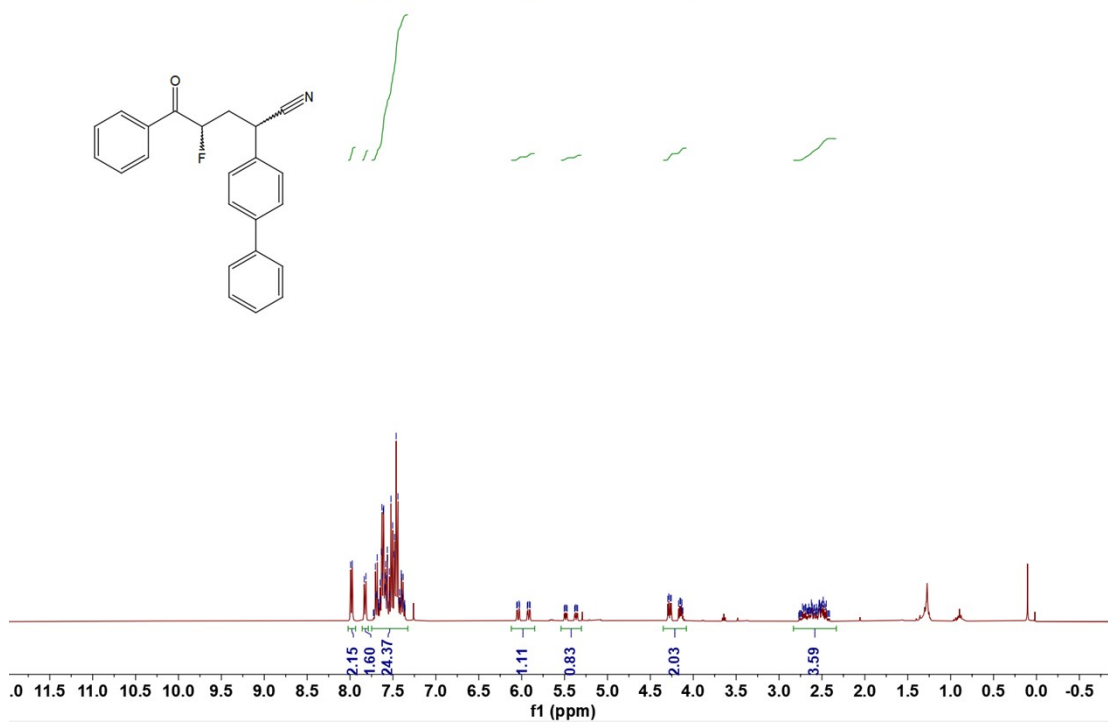

<sup>1</sup>H NMR of 3af

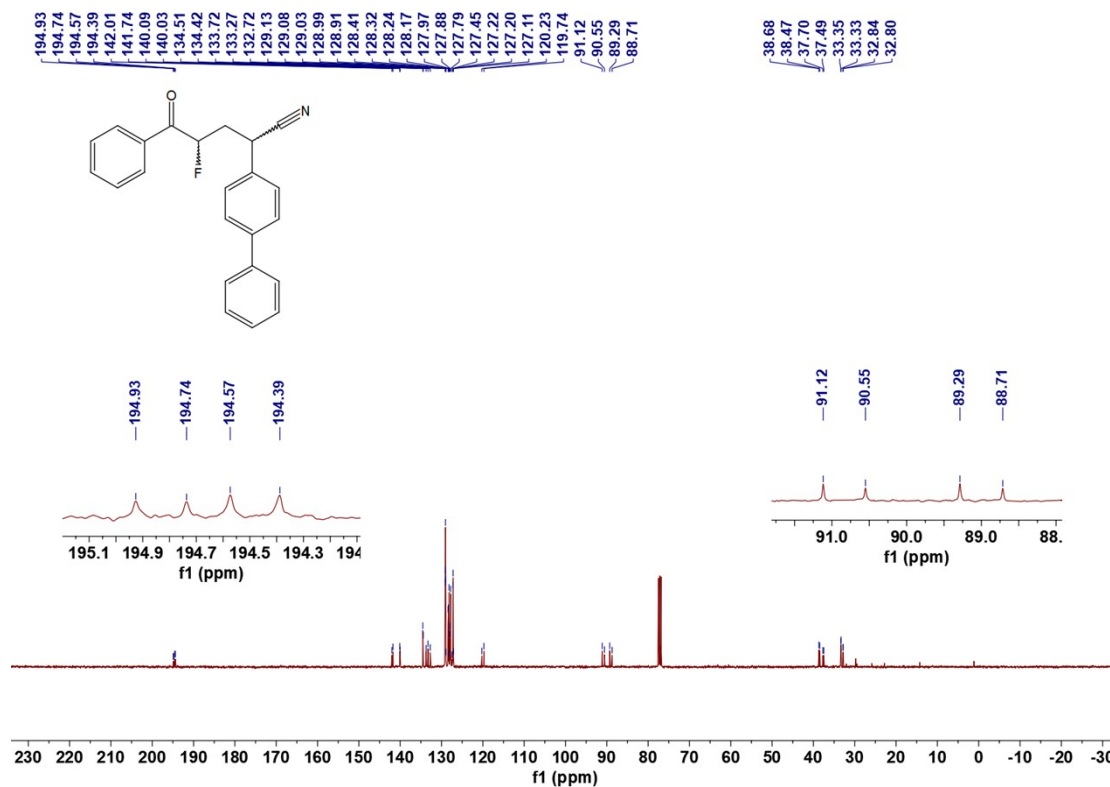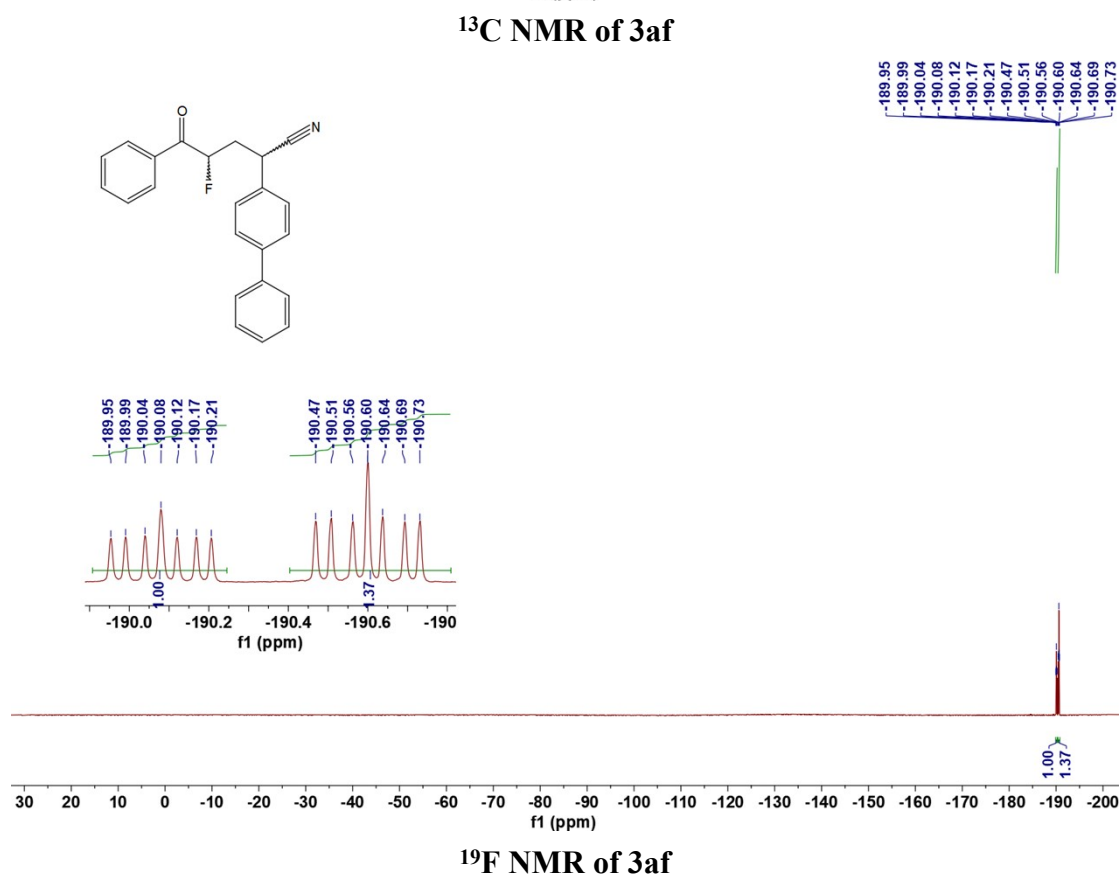

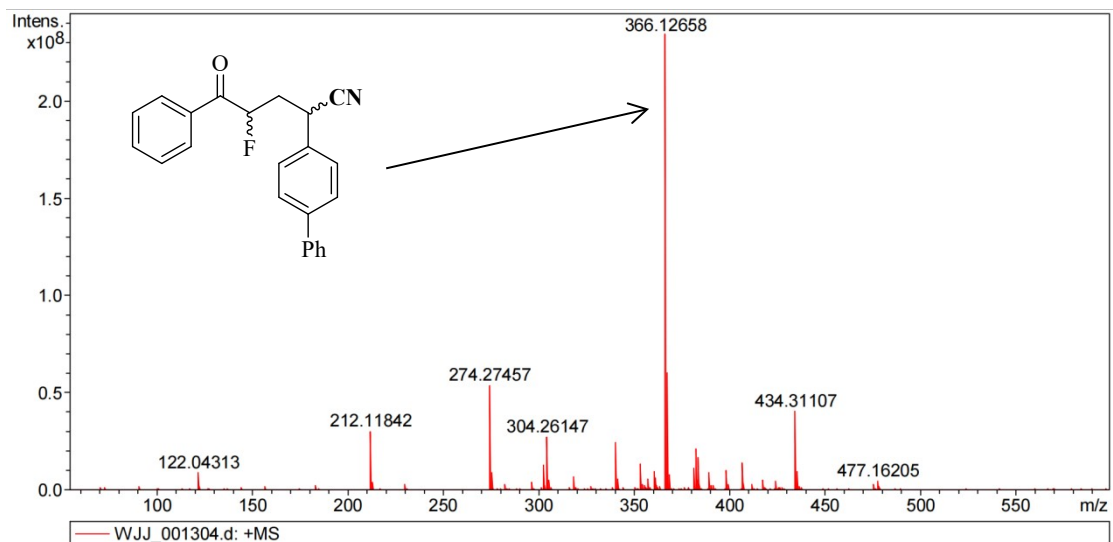

### HRMS of 3af

7.94  
7.92  
7.80  
7.78  
7.63  
7.61  
7.60  
7.59  
7.58  
7.57  
7.56  
7.50  
7.48  
7.46  
7.45  
7.43  
7.41  
7.40  
7.39  
7.38  
7.35  
7.34  
7.33  
7.32  
7.32  
7.14  
7.12  
7.10  
7.07  
7.05  
7.03  
5.99  
5.96  
5.87  
5.86  
5.84  
5.83  
5.31  
4.22  
4.20  
4.19  
4.18  
4.11  
4.09  
4.08  
4.07  
2.64  
2.62  
2.60  
2.58  
2.55  
2.52  
2.51  
2.46  
2.43  
2.42  
2.39  
2.38  
2.36

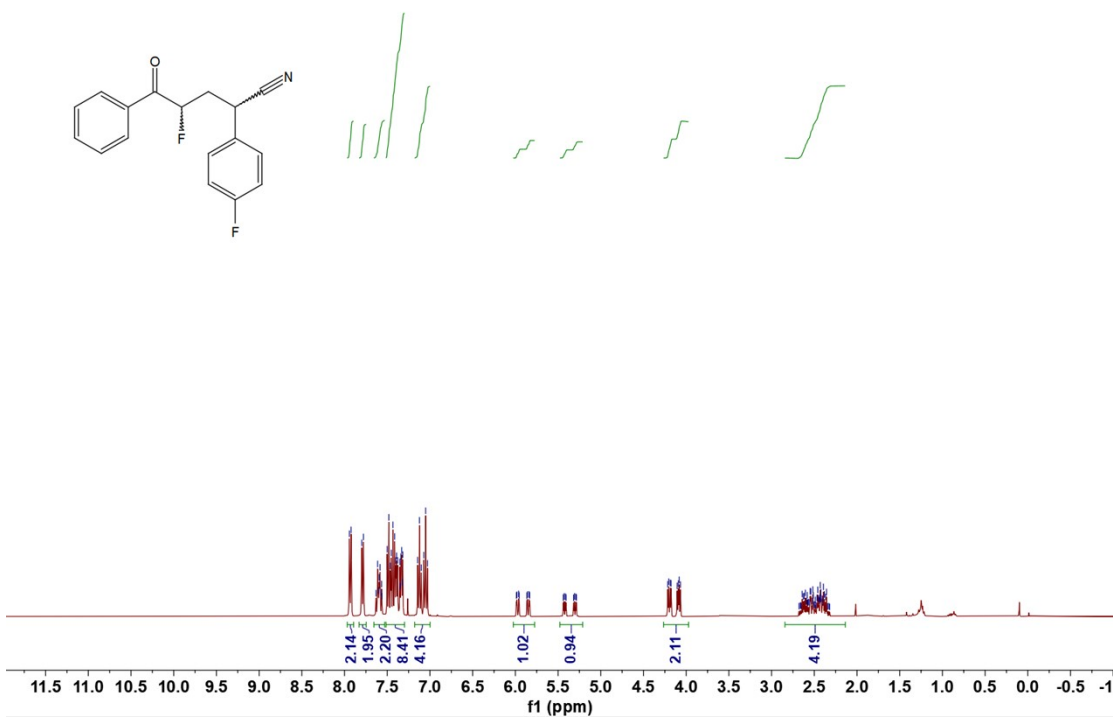

### <sup>1</sup>H NMR of 3ag

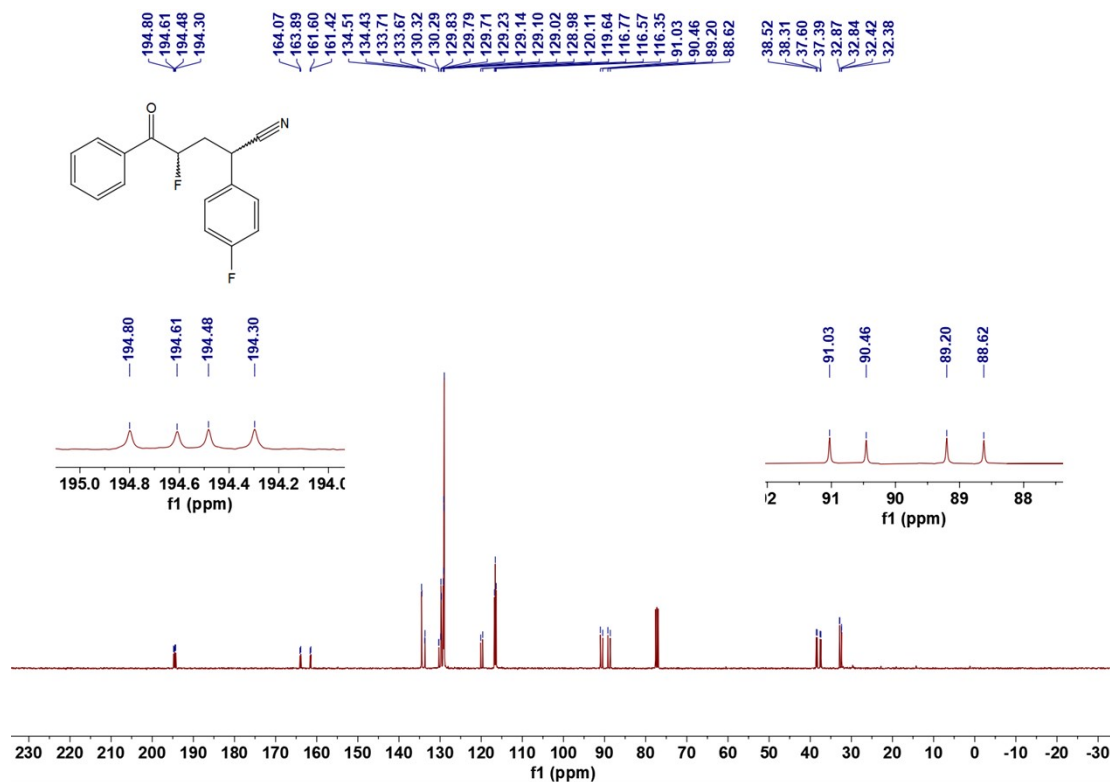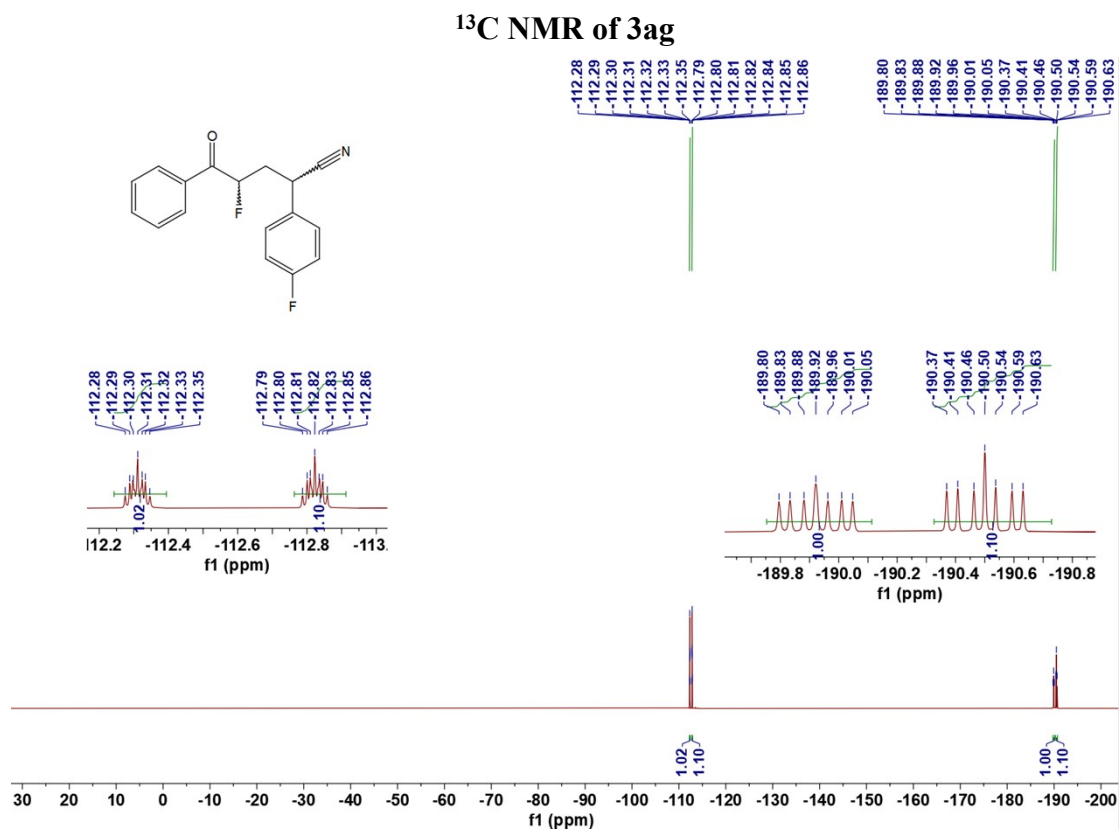

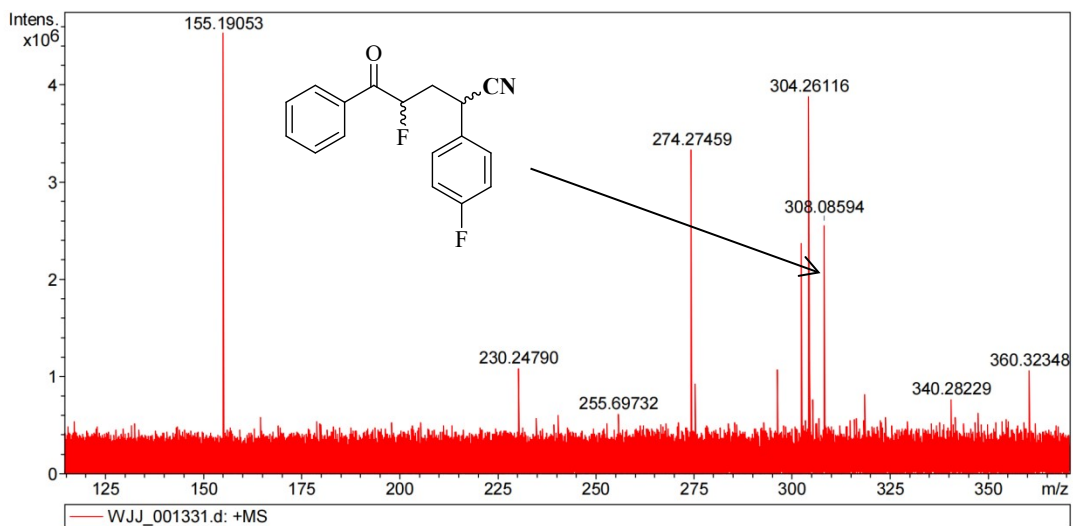

### HRMS of 3g

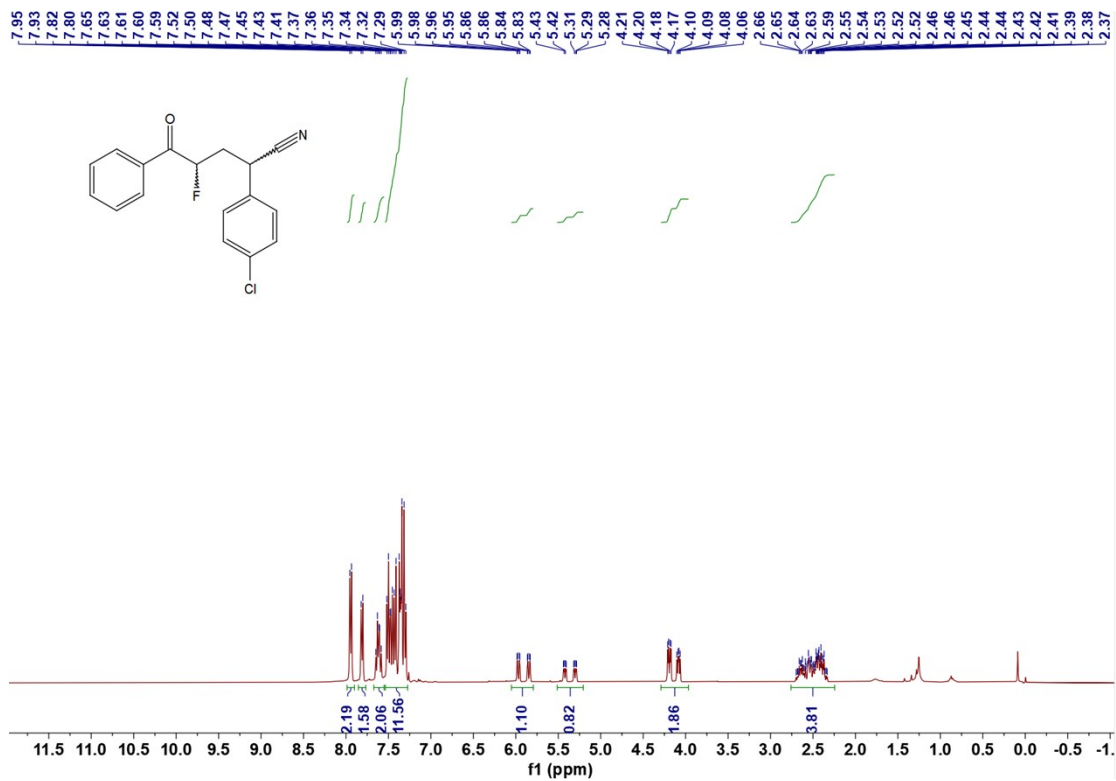

### <sup>1</sup>H NMR of 3ah



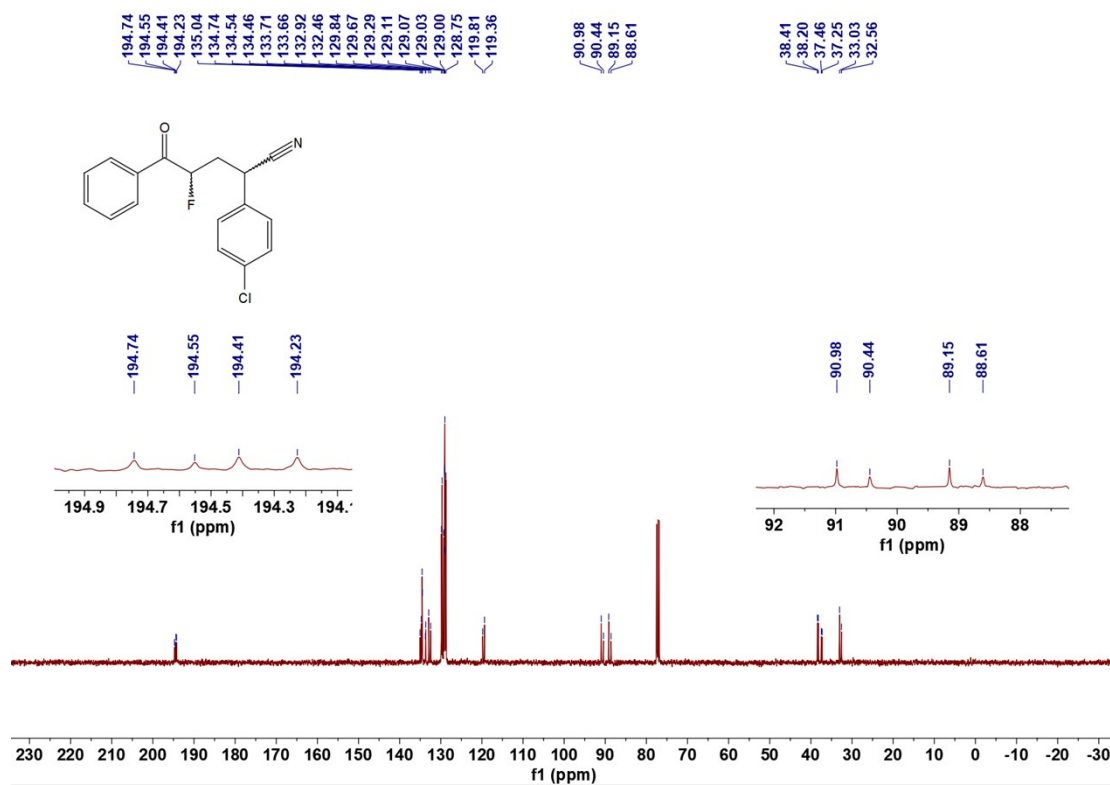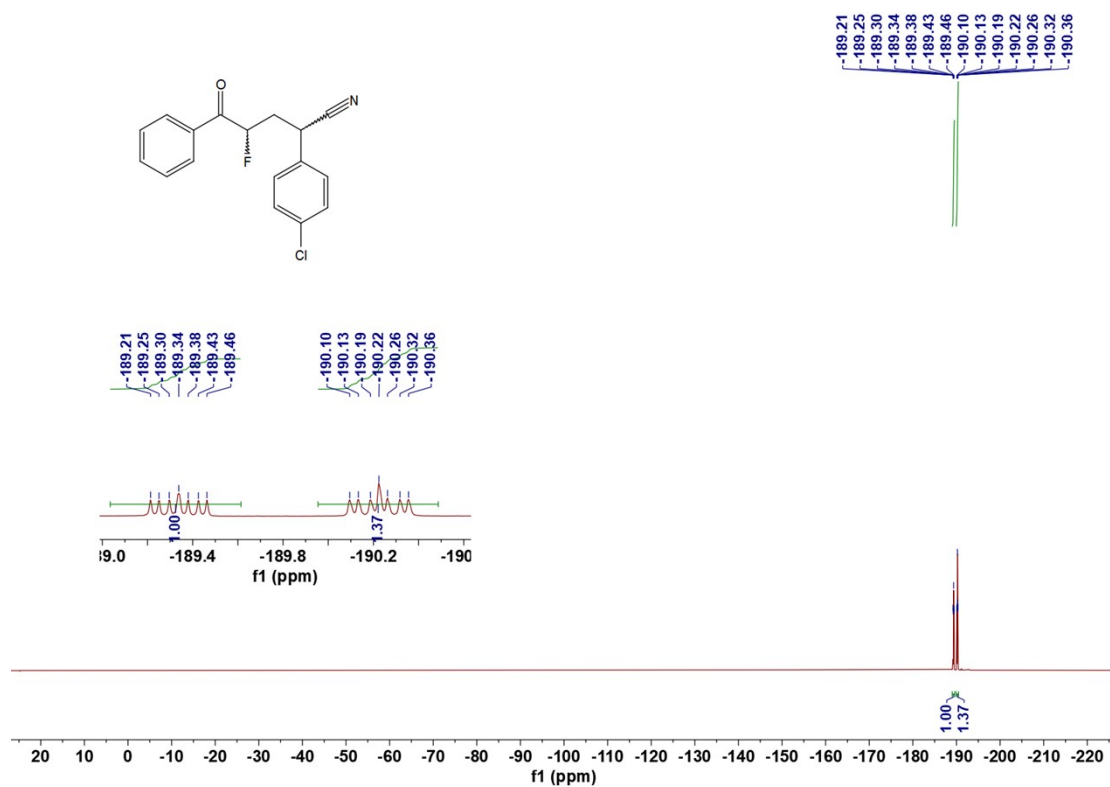

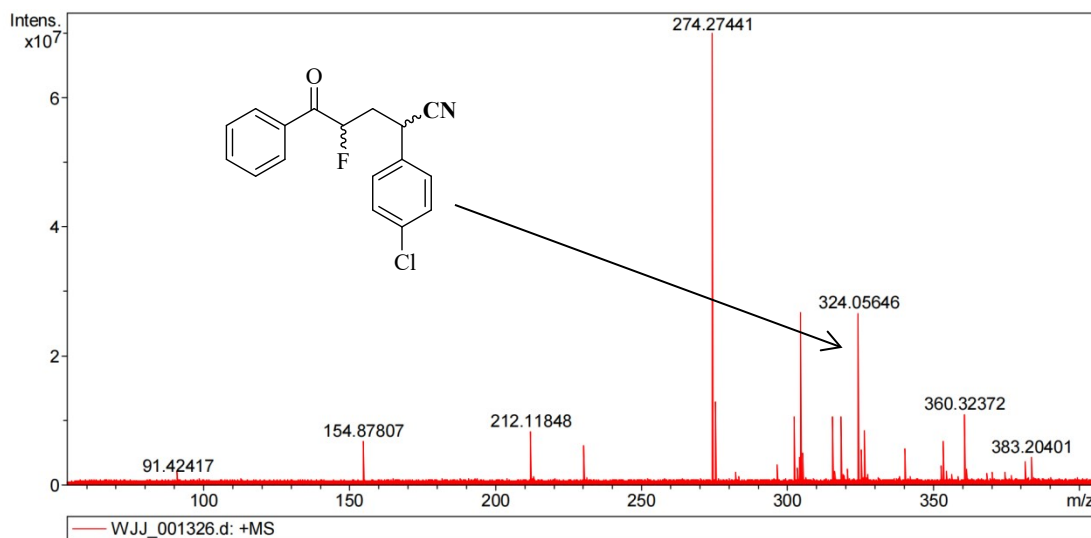

### HRMS of 3ah

7.96  
7.94  
7.81  
7.79  
7.65  
7.63  
7.63  
7.62  
7.61  
7.60  
7.60  
7.59  
7.58  
7.52  
7.52  
7.50  
7.49  
7.49  
7.48  
7.47  
7.45  
7.44  
7.43  
7.43  
7.42  
7.42  
7.41  
7.41  
7.38  
7.37  
7.36  
7.36  
6.00  
5.99  
5.97  
5.96  
5.87  
5.87  
5.85  
5.84  
4.61  
4.57  
4.57  
4.24  
4.23  
4.21  
4.21  
4.20  
4.12  
4.11  
4.10  
4.08  
4.08  
2.56  
2.48  
2.47  
2.46  
2.45  
2.44  
2.44  
2.43  
2.41  
2.41  
2.40  
2.39

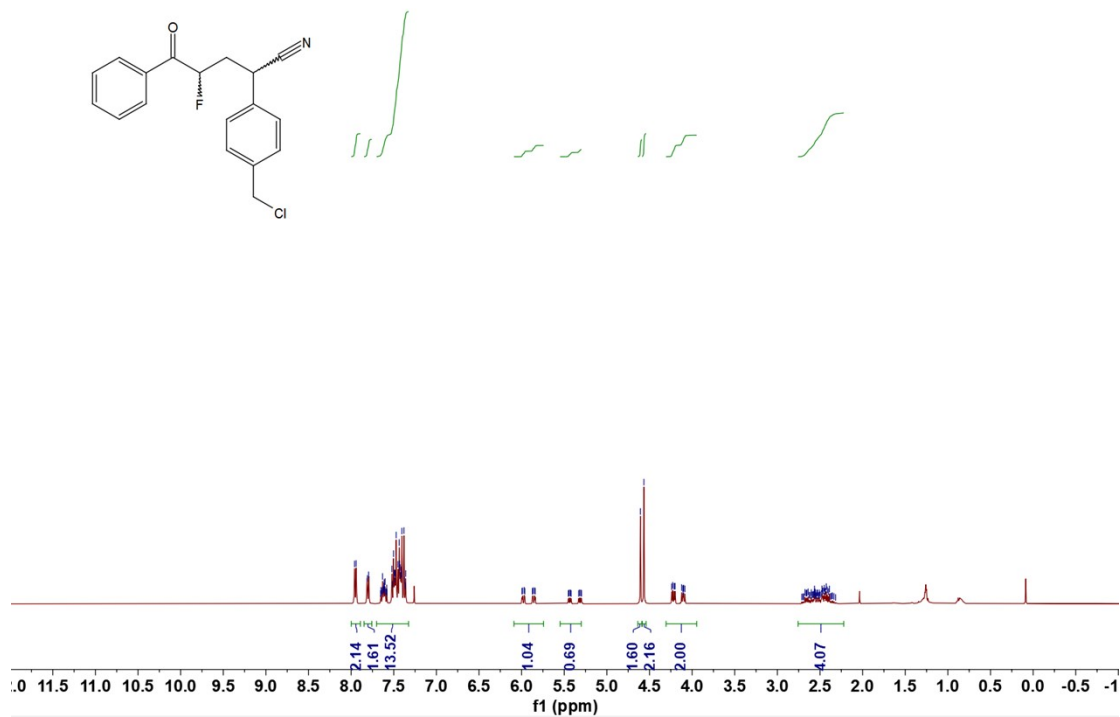

### <sup>1</sup>H NMR of 3ai

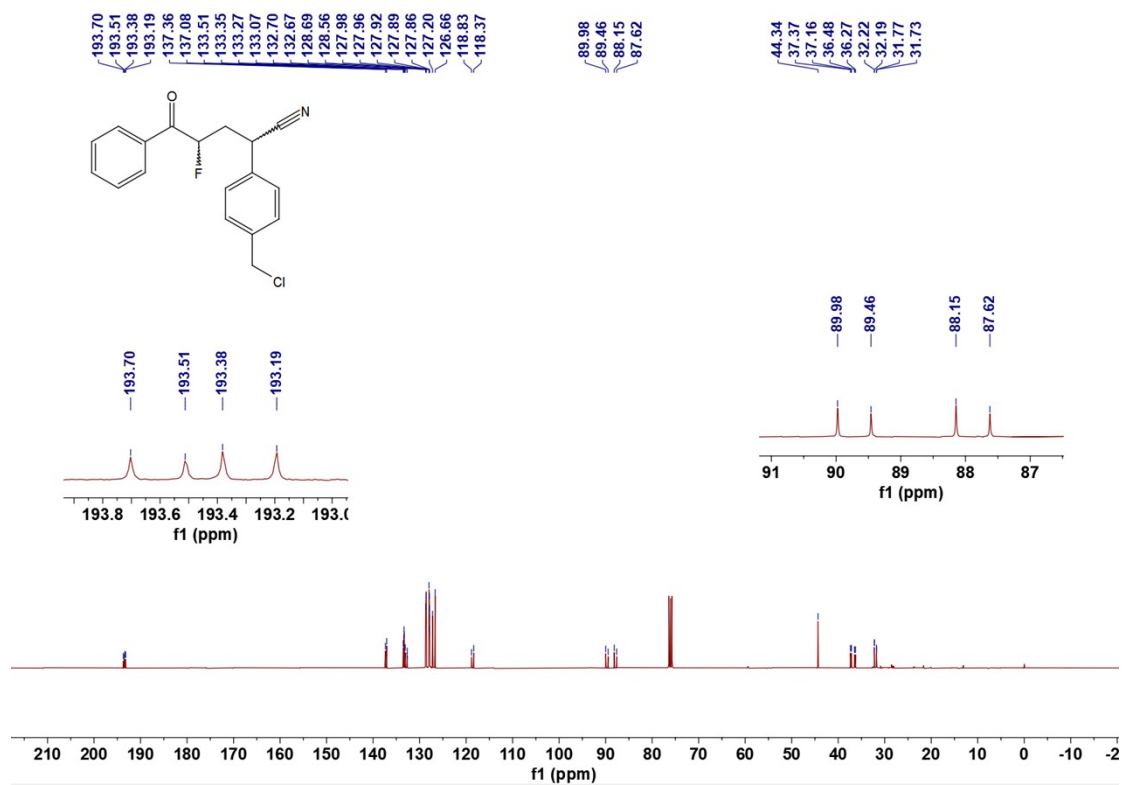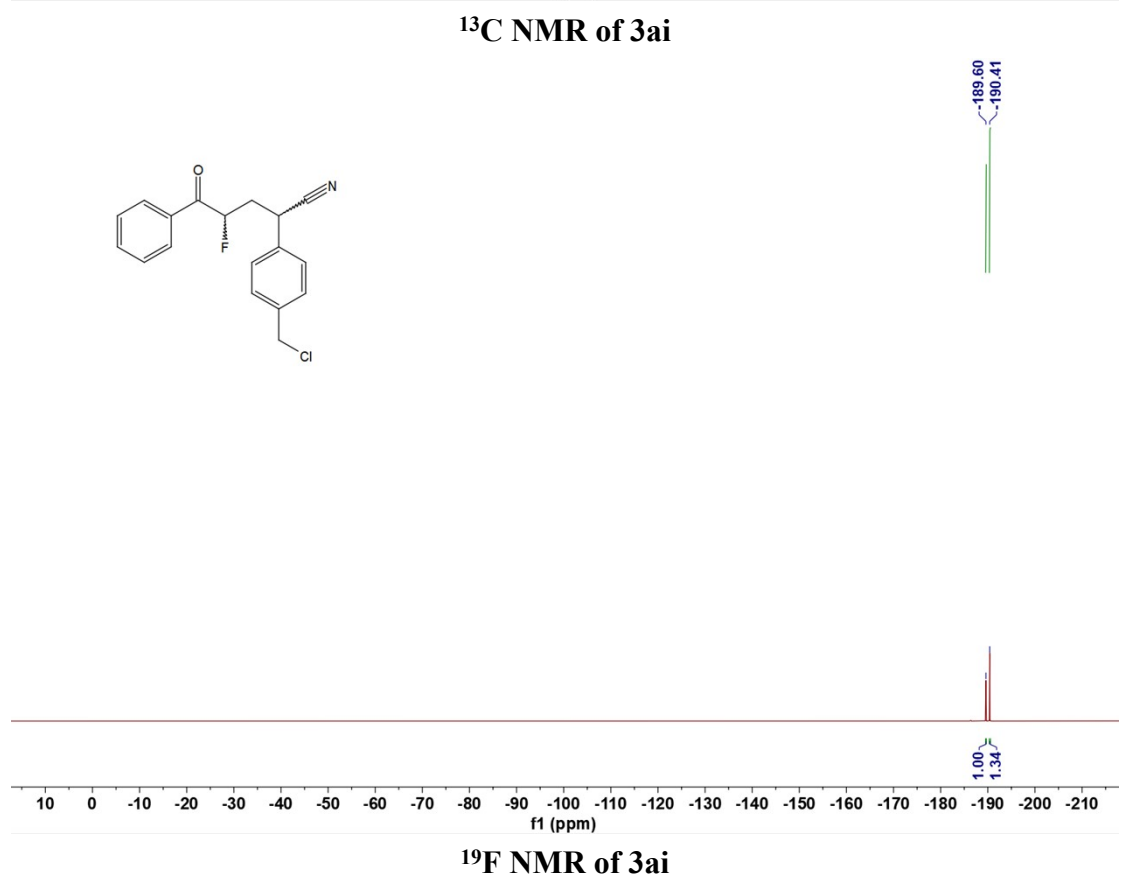

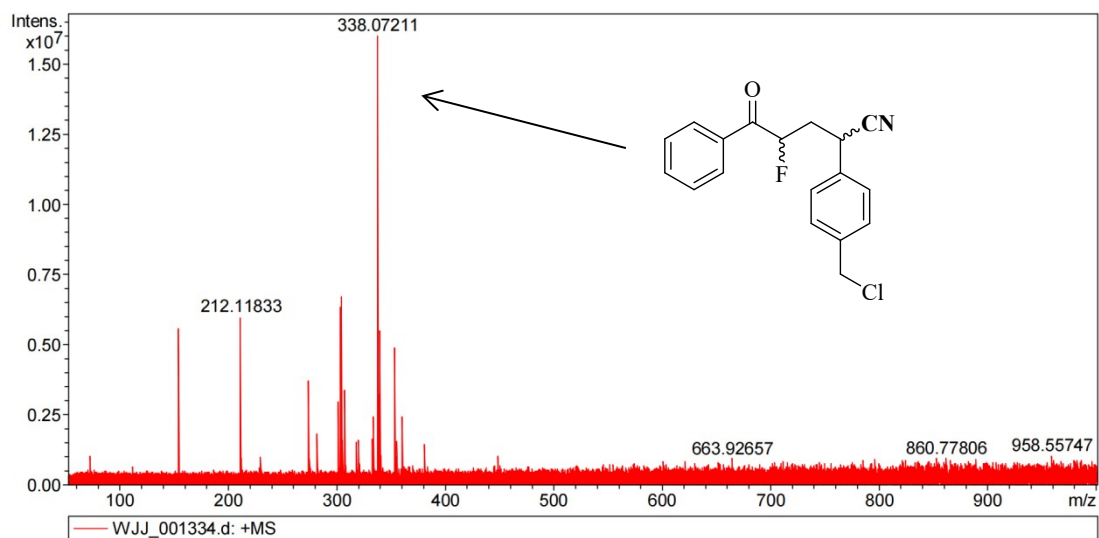

### HRMS of 3ai

7.99  
7.98  
7.97  
7.96  
7.91  
7.90  
7.88  
7.88  
7.63  
7.63  
7.62  
7.61  
7.61  
7.60  
7.59  
7.58  
7.57  
7.53  
7.52  
7.51  
7.51  
7.49  
7.49  
7.47  
7.47  
7.46  
7.46  
7.45  
7.45  
7.44  
7.43  
7.42  
7.41  
7.40  
7.38  
7.37  
7.36  
7.36  
7.35  
7.35  
7.34  
7.34  
7.33  
7.33  
7.31  
7.31  
4.70  
4.69  
4.68  
4.68  
4.66  
4.60  
2.69  
2.64  
2.62  
2.52  
2.46

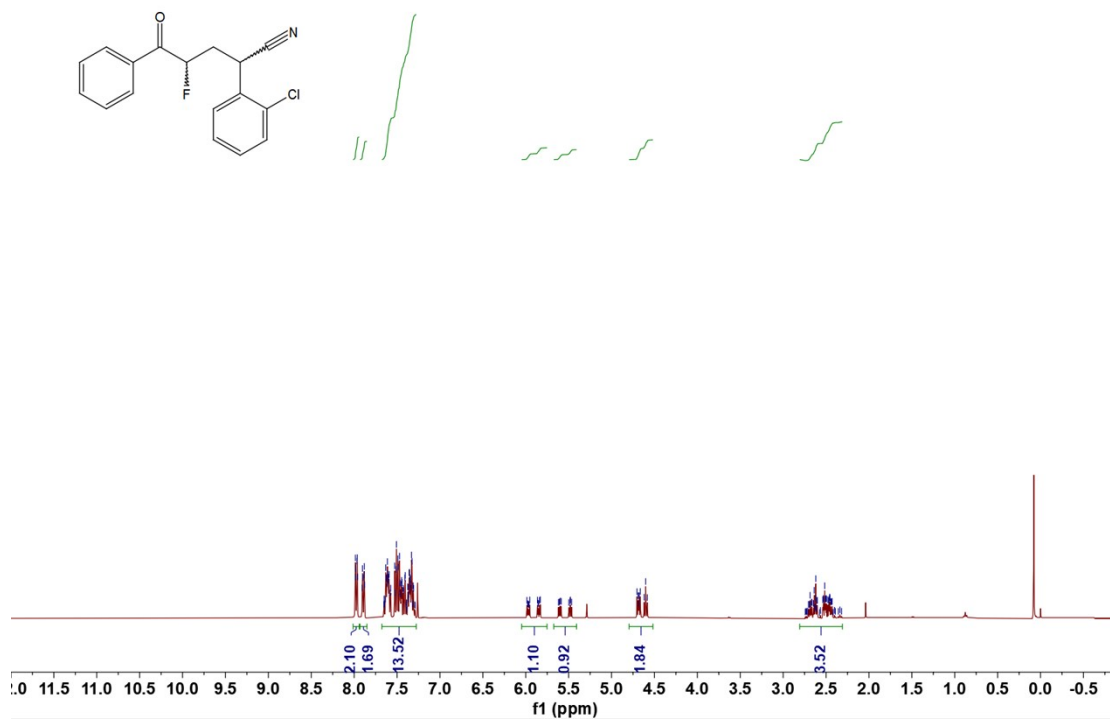

### <sup>1</sup>H NMR of 3aj

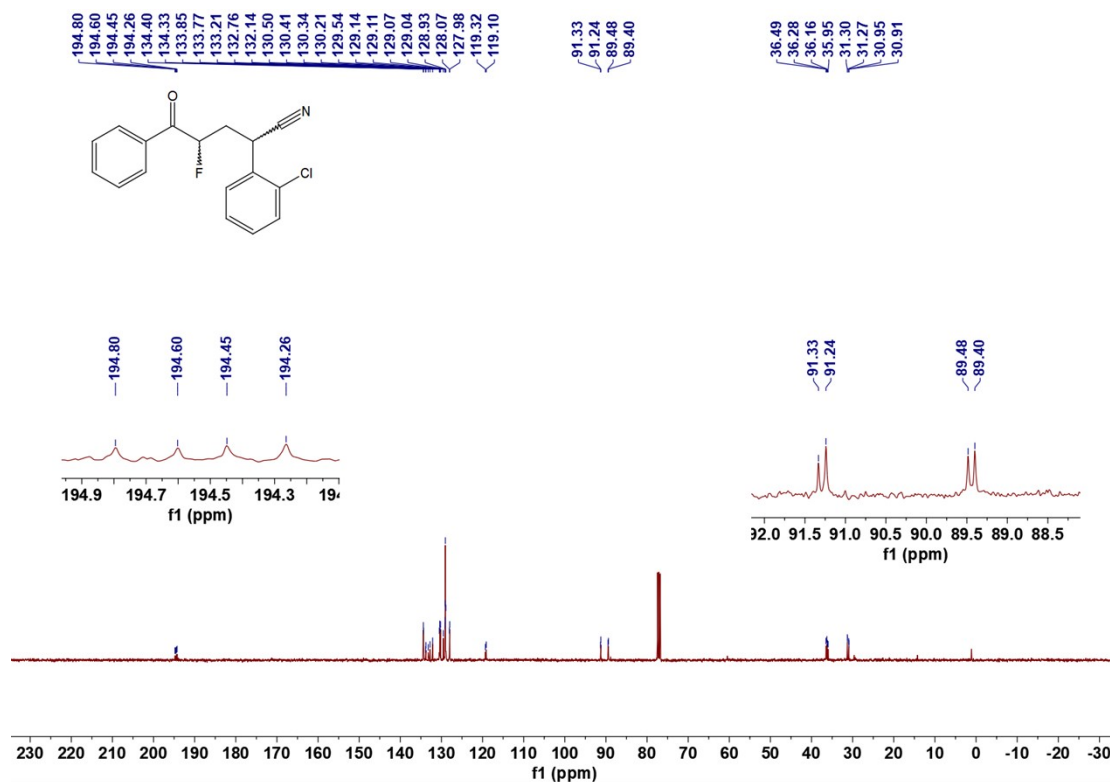

**<sup>13</sup>C NMR of 3aj**

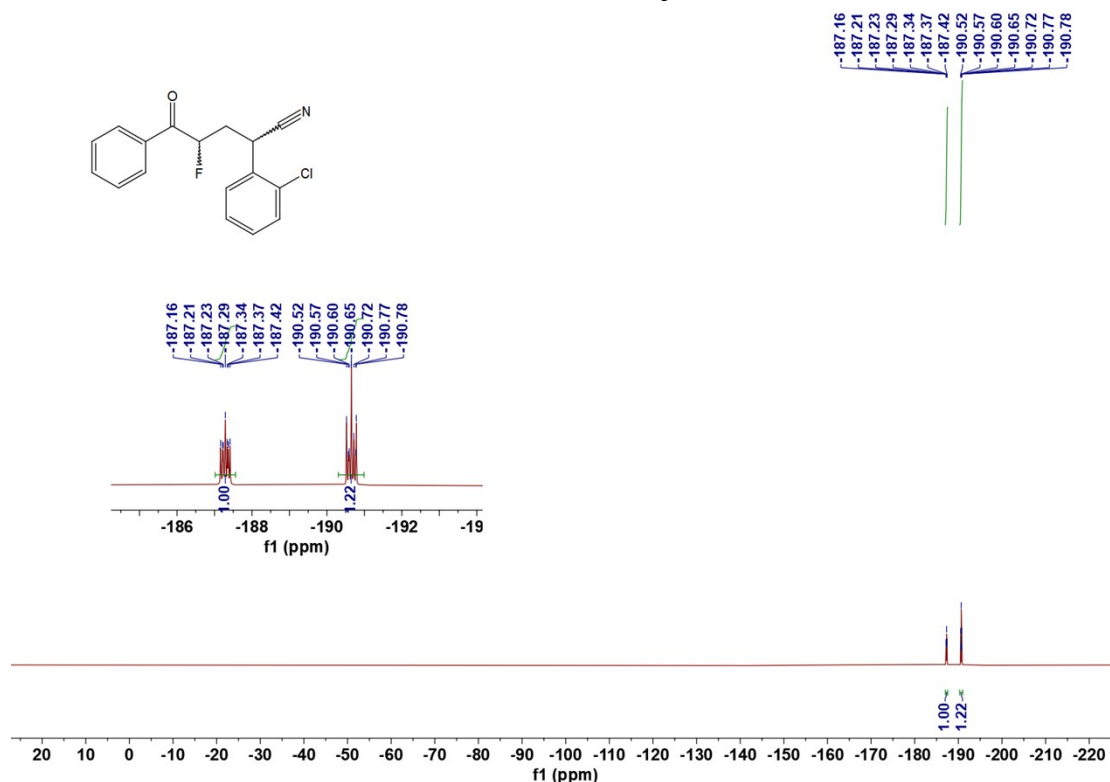

**<sup>19</sup>F NMR of 3aj**

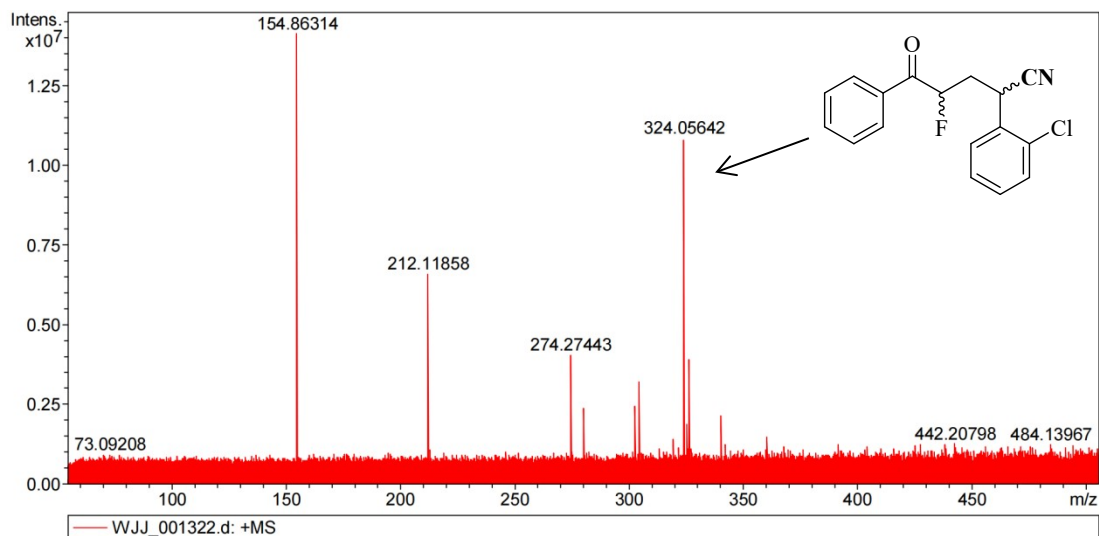

### HRMS of 3aj

8.00  
7.98  
7.87  
7.85  
7.68  
7.67  
7.66  
7.65  
7.63  
7.62  
7.61  
7.60  
7.56  
7.55  
7.54  
7.53  
7.53  
7.52  
7.52  
7.49  
7.48  
7.36  
7.35  
7.34  
7.34  
7.30  
7.28  
7.28  
6.00  
5.99  
5.87  
5.87  
5.46  
5.45  
5.44  
5.34  
5.33  
5.32  
4.23  
4.22  
4.21  
4.19  
4.16  
4.14  
4.13  
4.11  
4.10  
4.09  
2.71  
2.67  
2.58  
2.50  
2.45

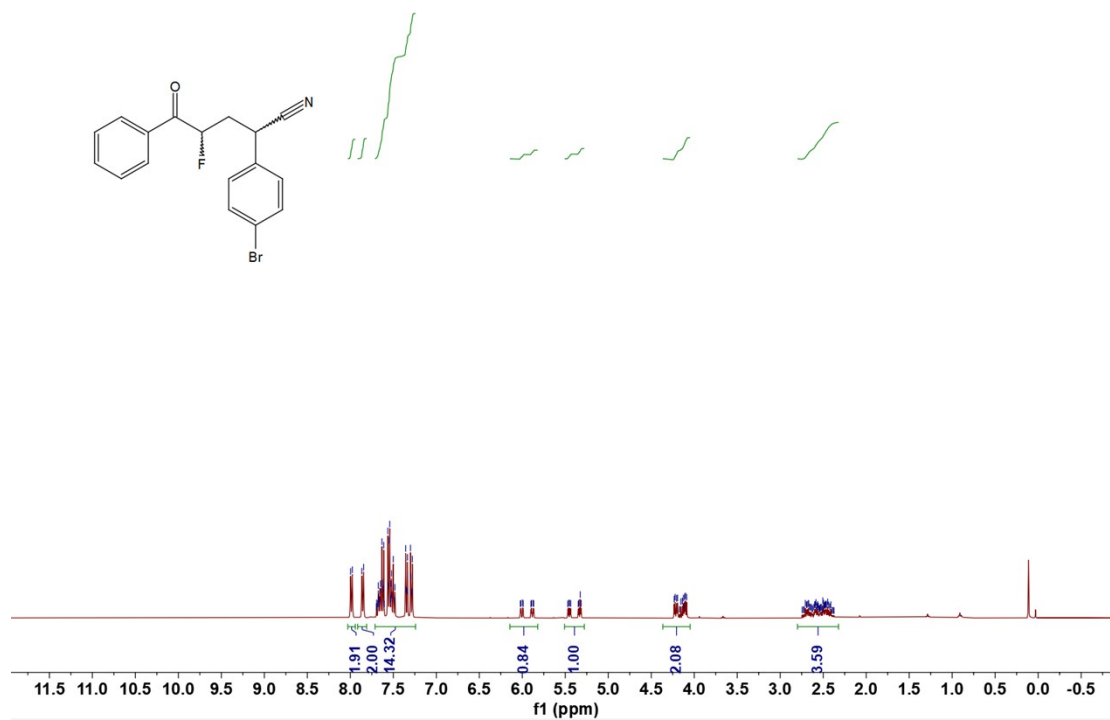

### <sup>1</sup>H NMR of 3ak

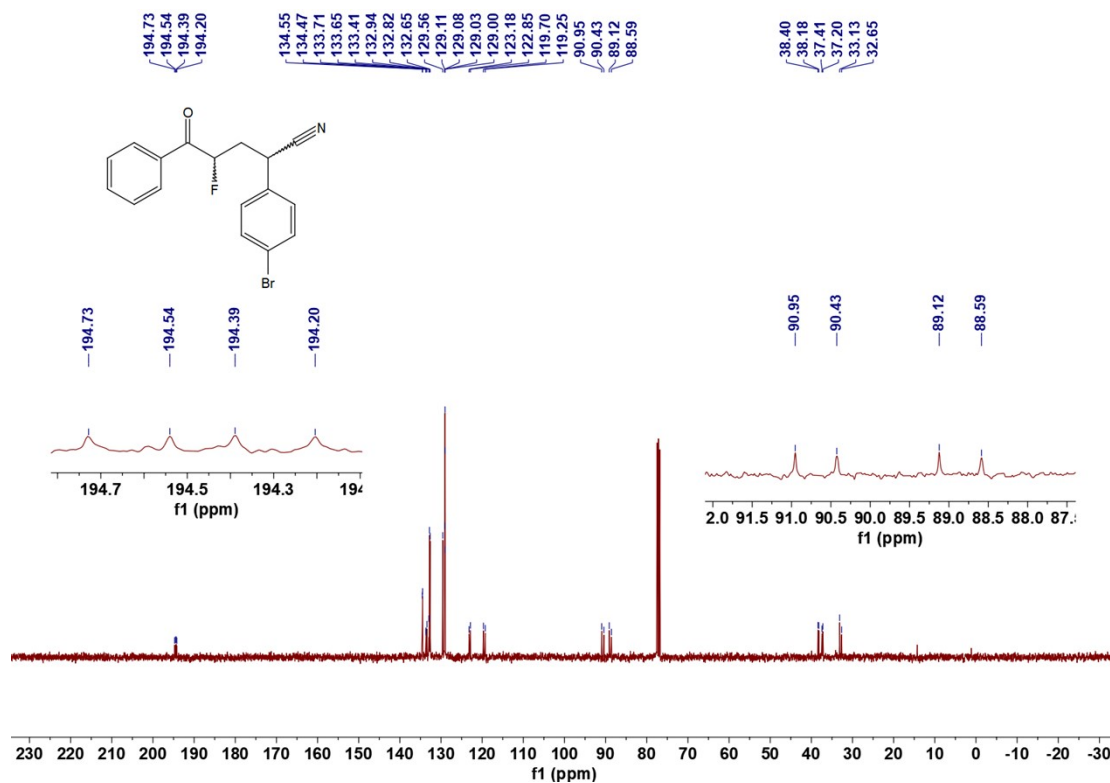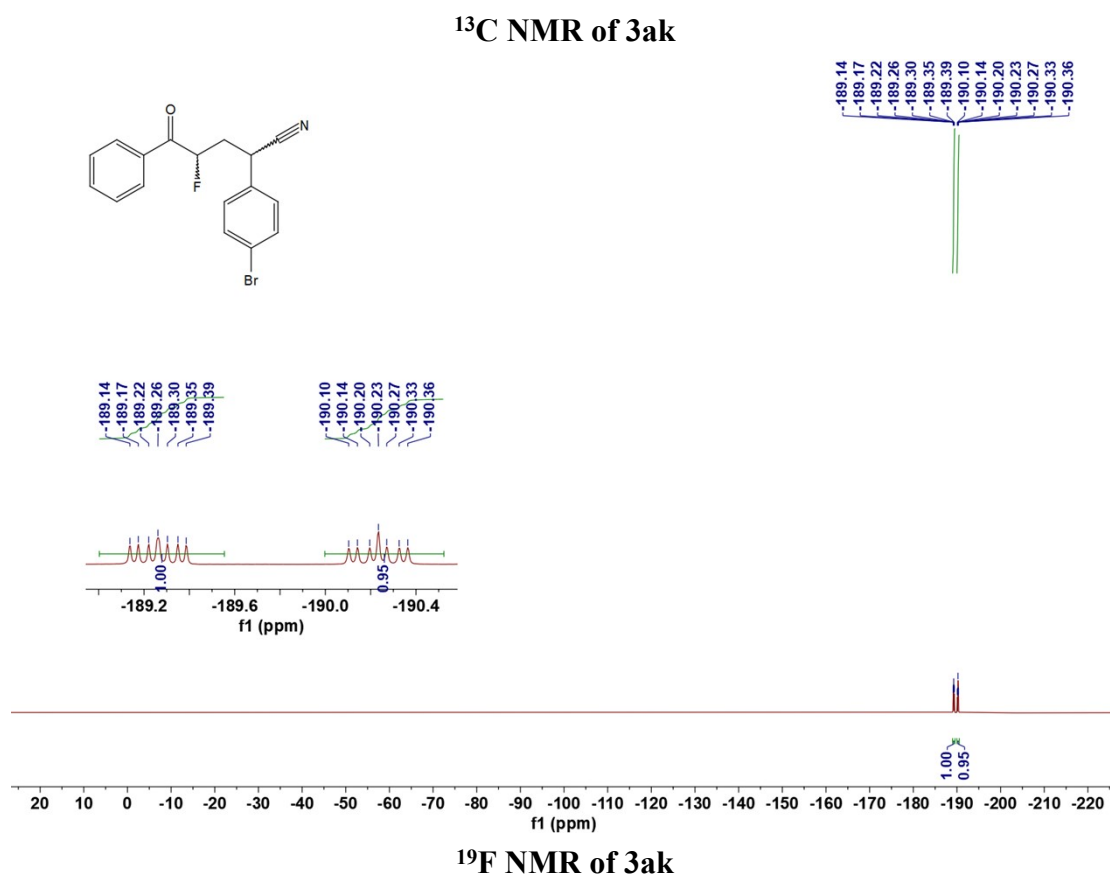

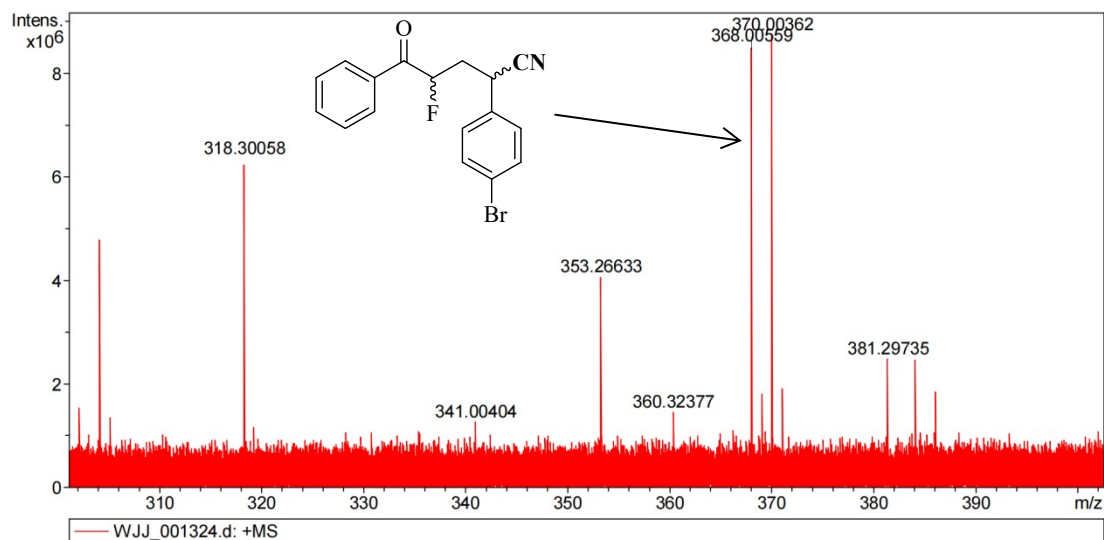

### HRMS of 3ak

7.97 7.95 7.85 7.83 7.73 7.71 7.67 7.66 7.65 7.64 7.64 7.63 7.62 7.62 7.60 7.60 7.59 7.57 7.53 7.53 7.51 7.51 7.50 7.49 7.49 7.47 7.45 6.01 6.01 5.99 5.98 5.89 5.88 5.87 5.86 5.86 5.45 5.44 5.35 5.34 5.33 5.32 4.31 4.30 4.28 4.27 4.27 4.21 4.20 4.19 4.17 4.17 2.72 2.70 2.70 2.68 2.63 2.63 2.62 2.61 2.60 2.59 2.57 2.56 2.56 2.55 2.52 2.52

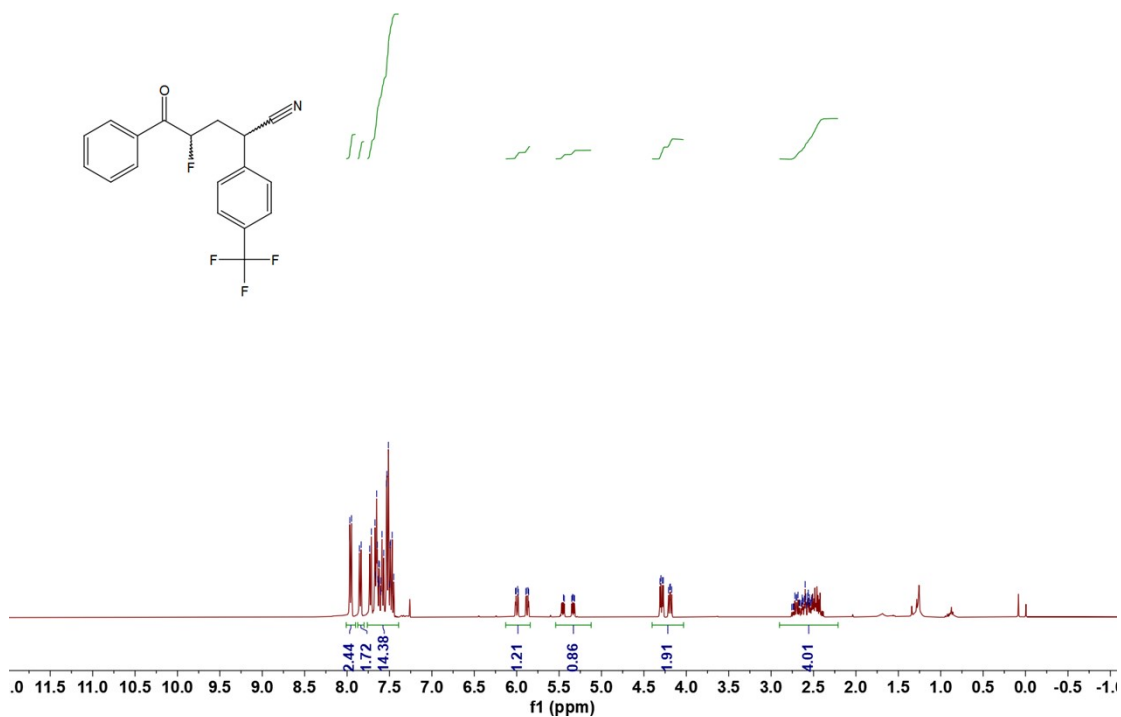

### $^1\text{H}$ NMR of 3al



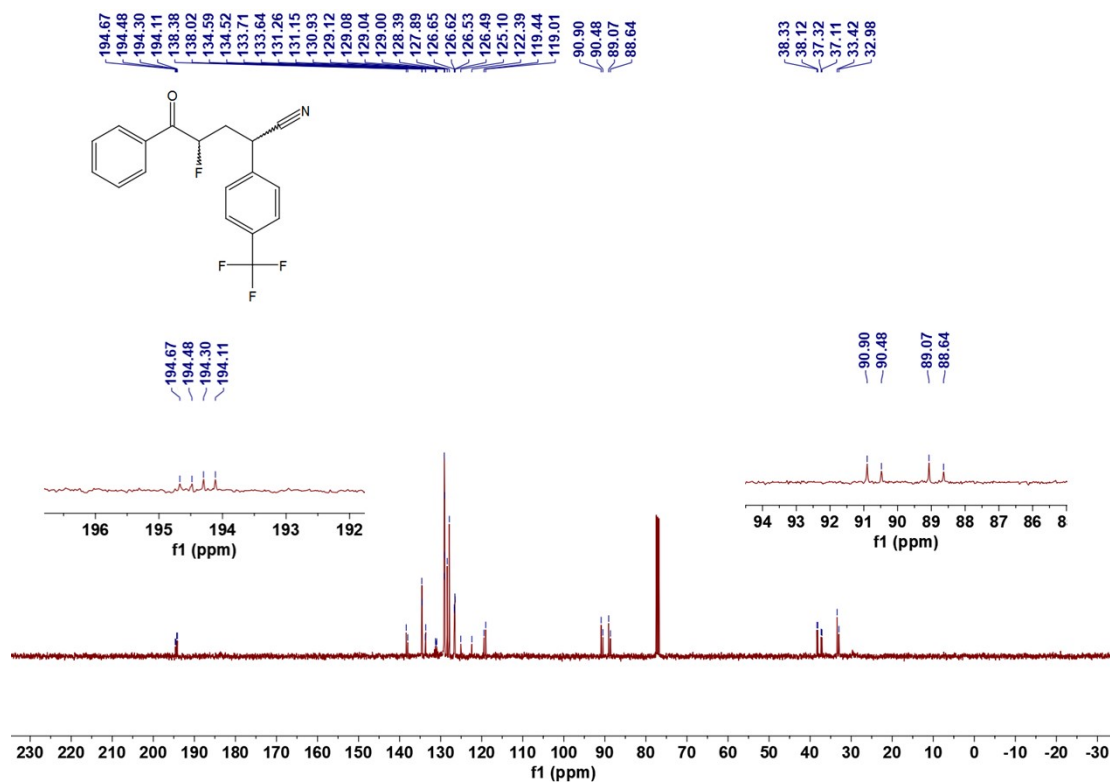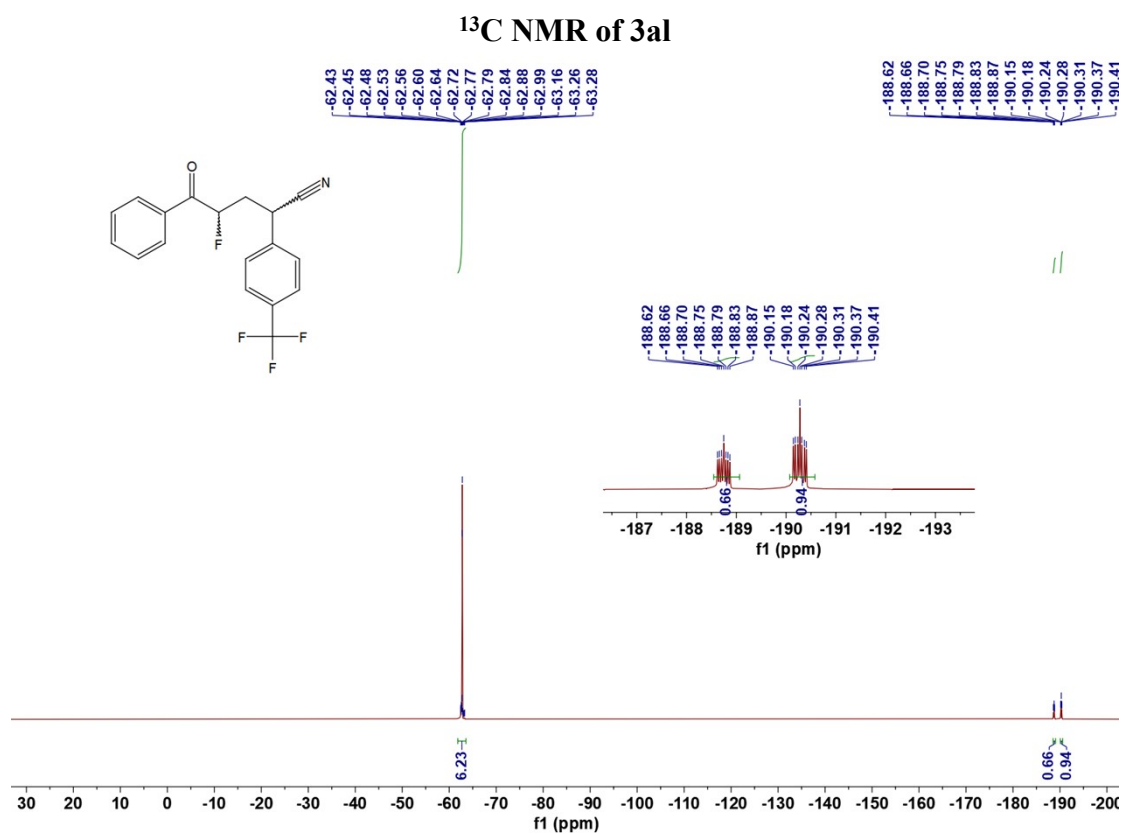

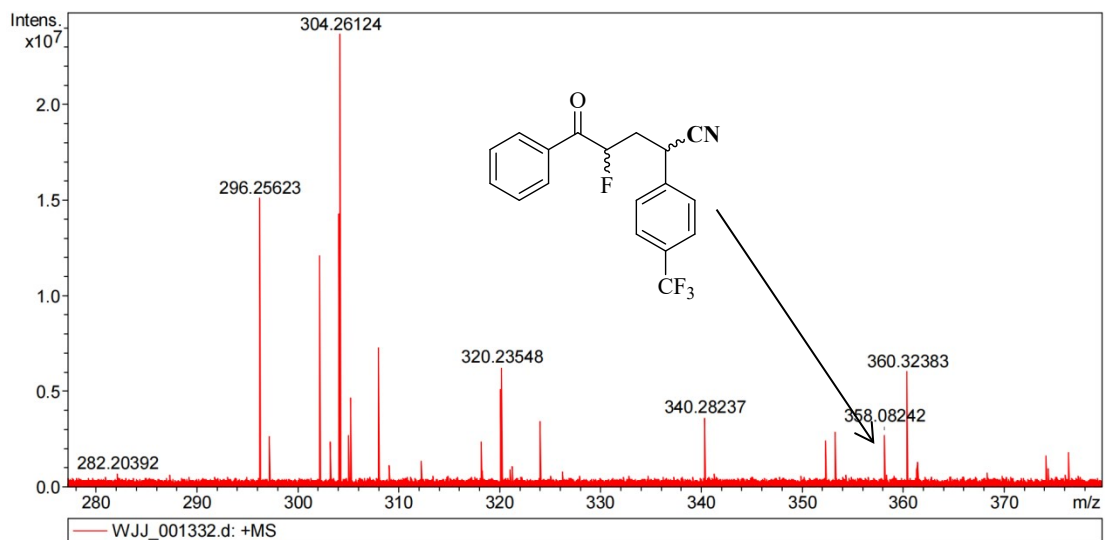

### HRMS of 3a

8.00  
7.99  
7.98  
7.98  
7.98  
7.97  
7.97  
7.93  
7.93  
7.92  
7.91  
7.91  
7.90  
7.89  
7.88  
7.87  
7.86  
7.85  
7.82  
7.82  
7.80  
7.80  
7.77  
7.65  
7.65  
7.64  
7.64  
7.64  
7.63  
7.63  
7.61  
7.61  
7.60  
7.60  
7.59  
7.59  
7.58  
7.58  
7.57  
7.57  
7.56  
7.56  
7.55  
7.55  
7.55  
7.54  
7.54  
7.53  
7.53  
7.52  
7.52  
7.51  
7.51  
7.47  
7.46  
7.44  
7.44  
7.43  
7.43  
4.44  
4.43  
4.41  
4.41  
4.40  
4.40  
4.32  
4.30  
4.29  
4.28  
4.28  
2.74  
2.73  
2.73  
2.57

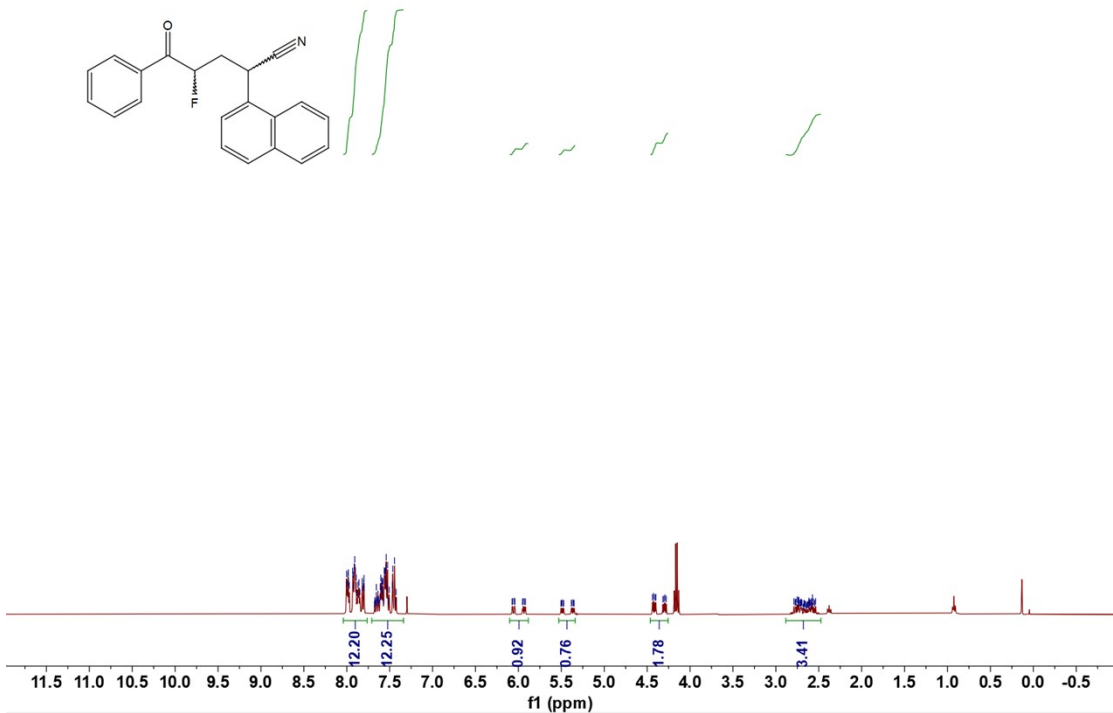

### <sup>1</sup>H NMR of 3a

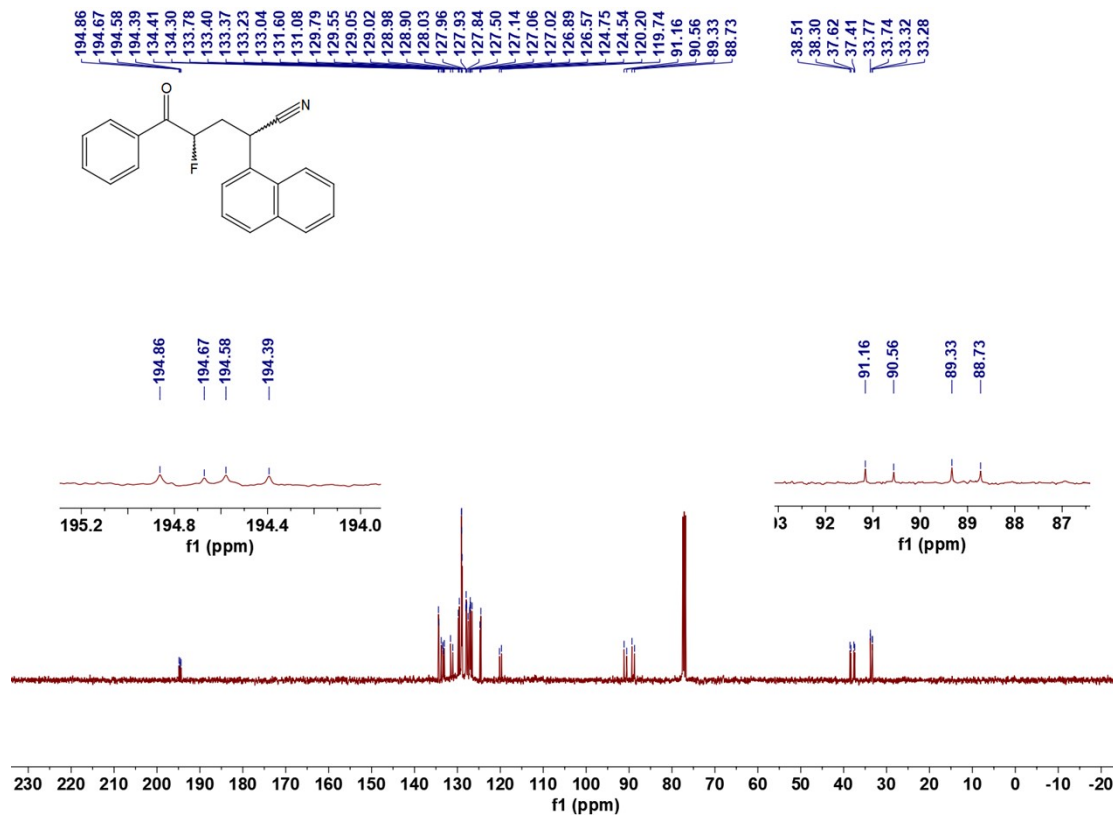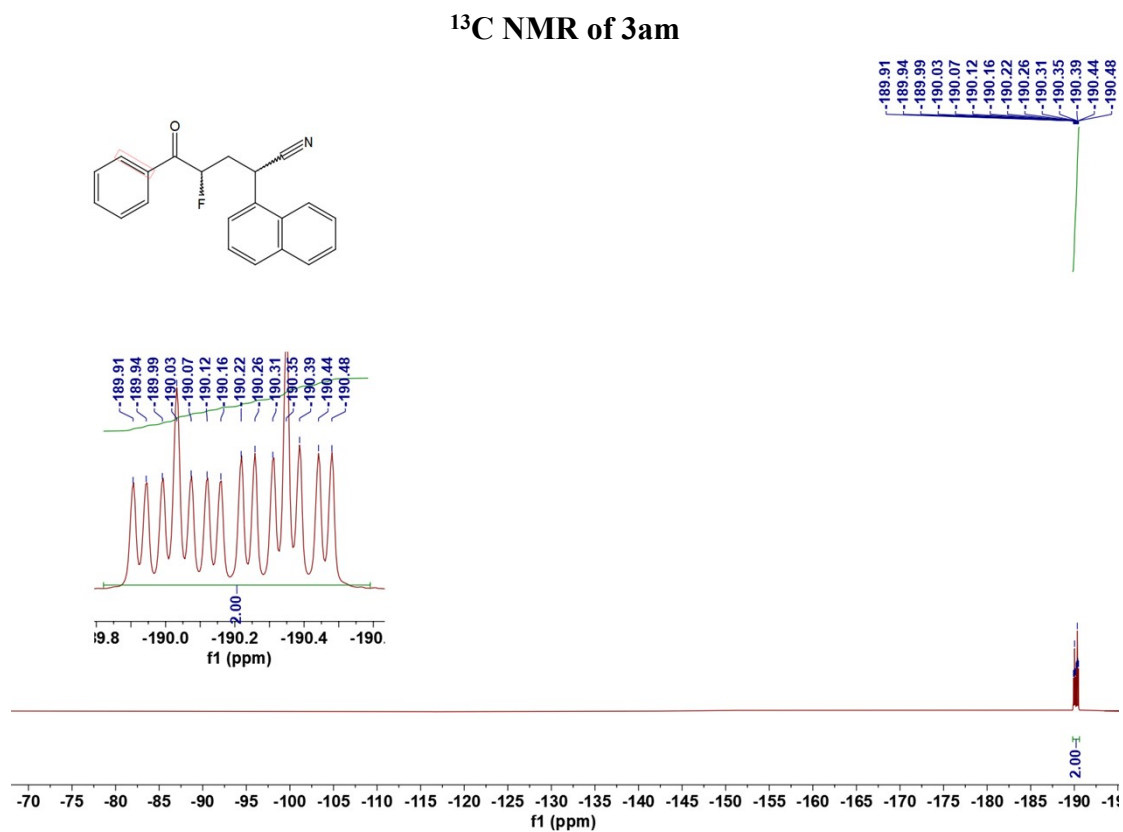

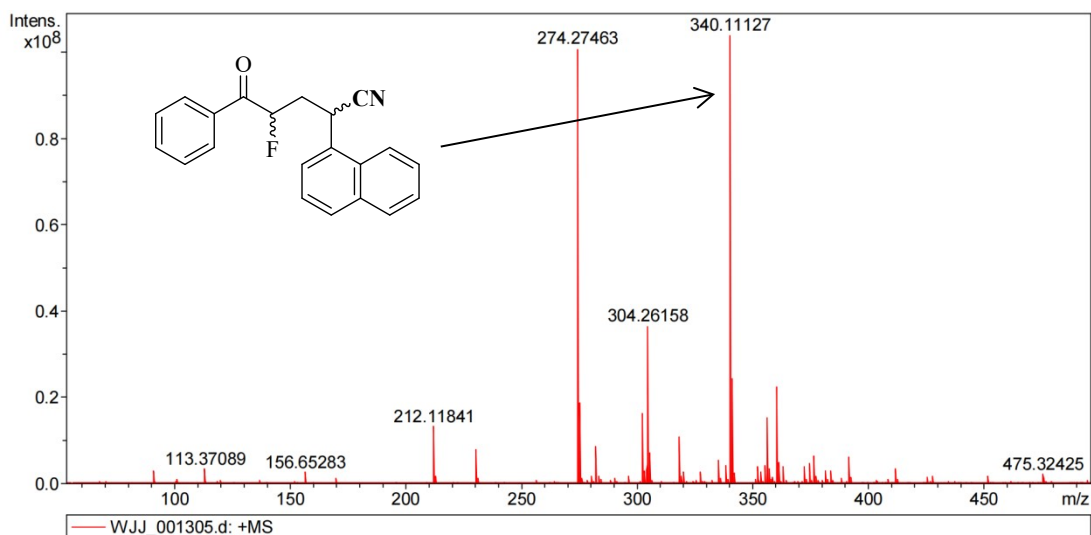

HRMS of 3am

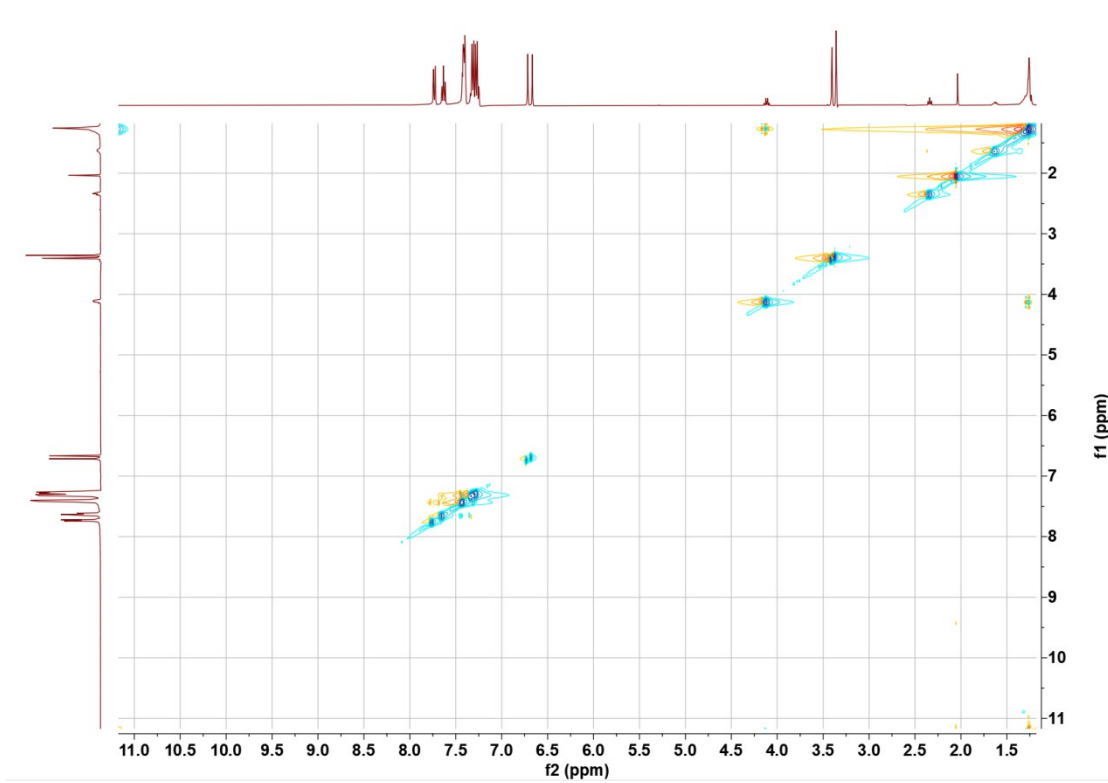

NOE of 5a

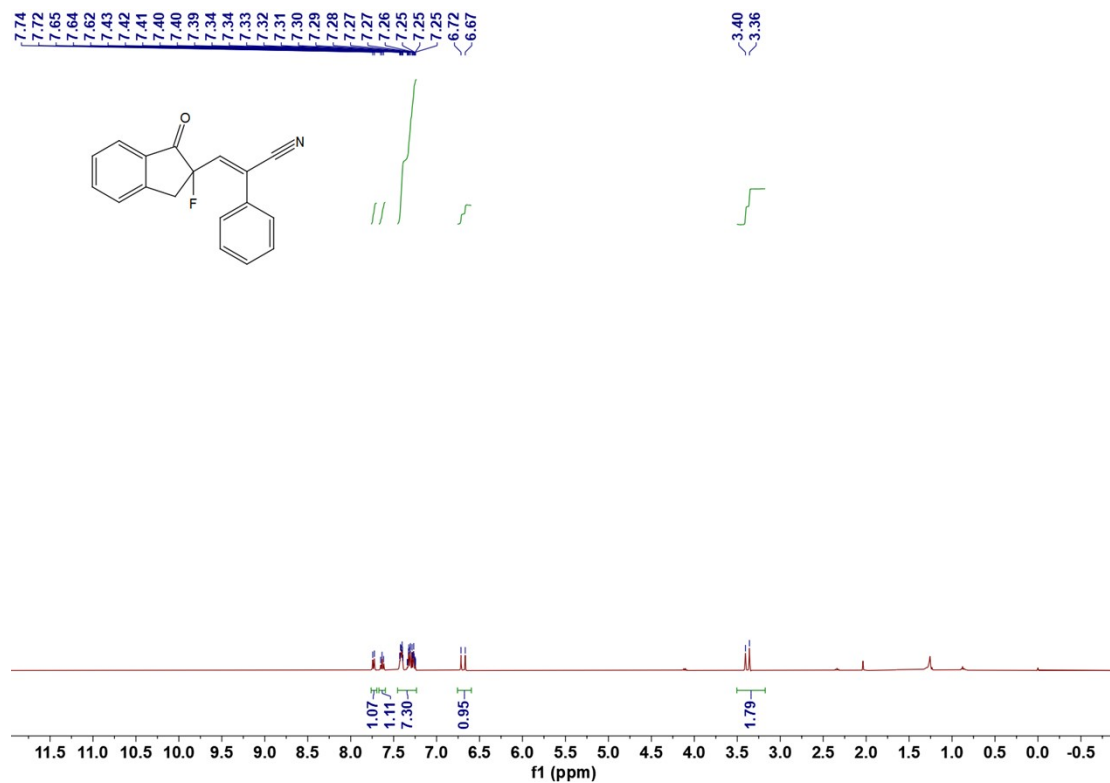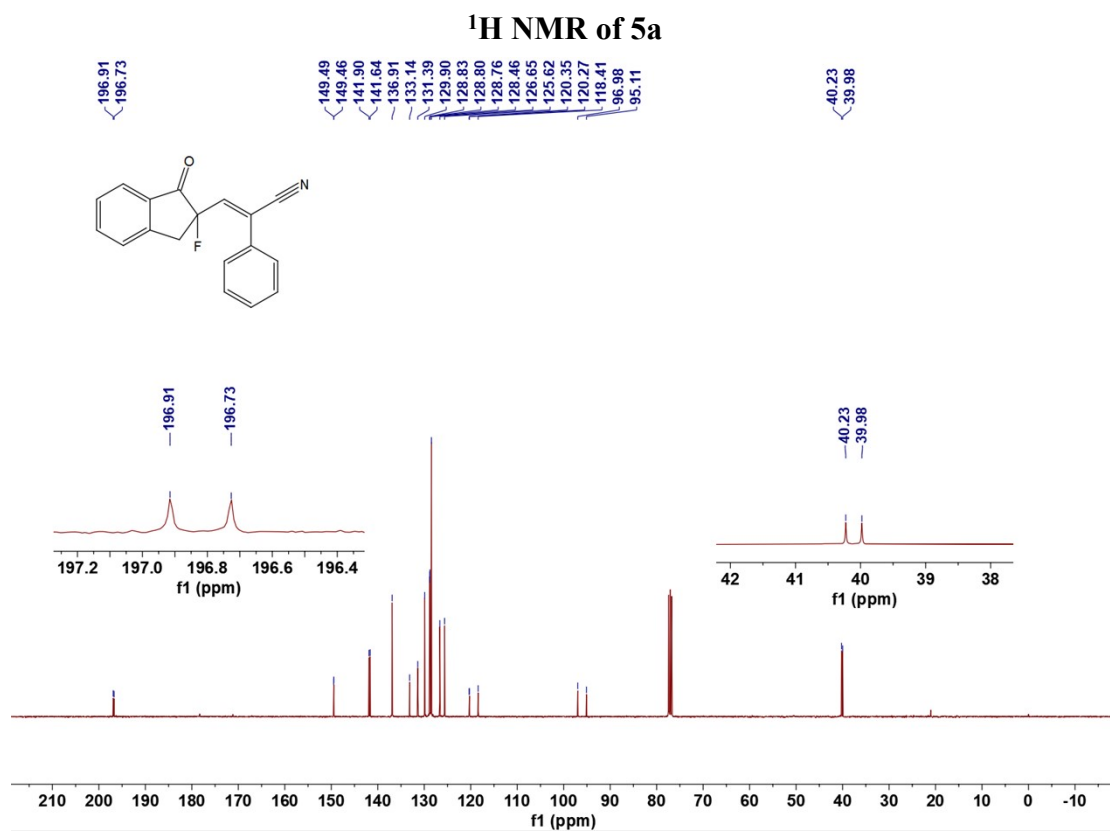

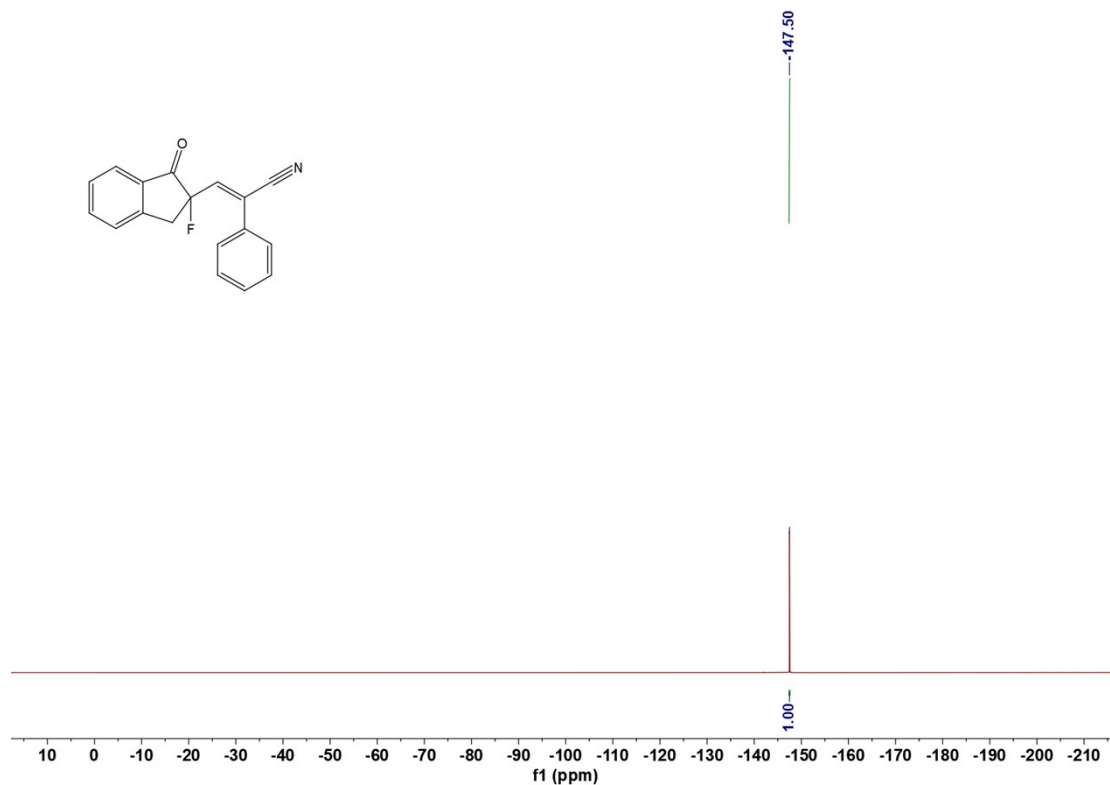

**<sup>19</sup>F NMR of 5a**

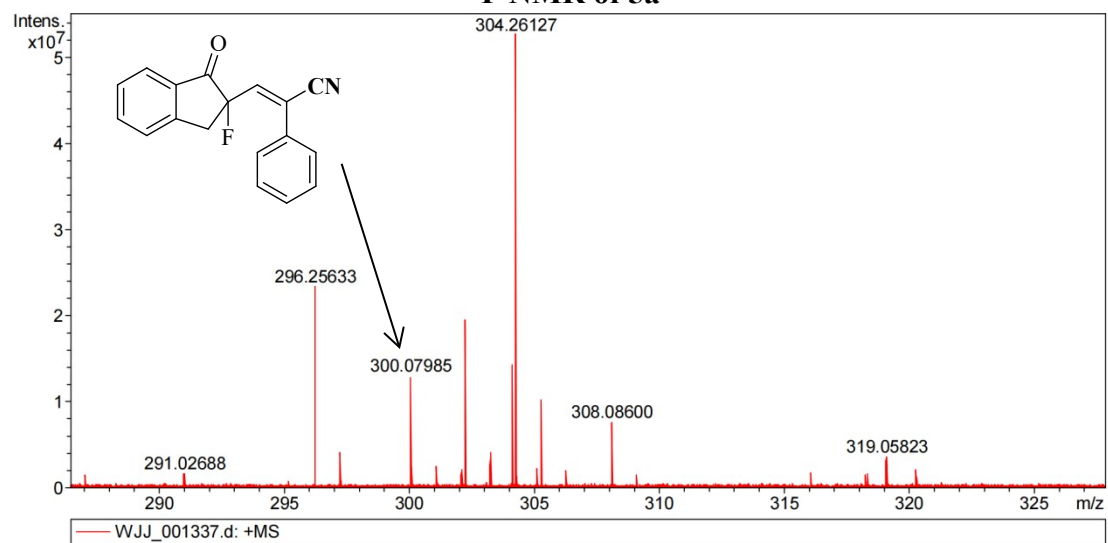

**HRMS of 5a**

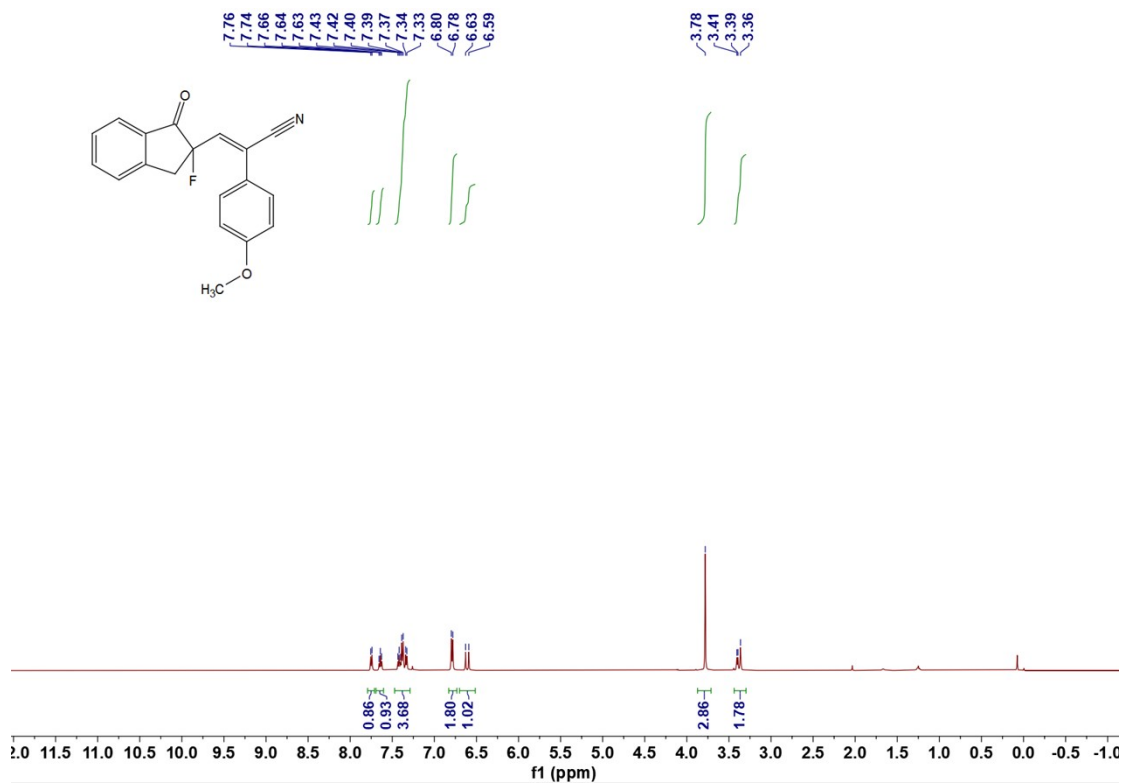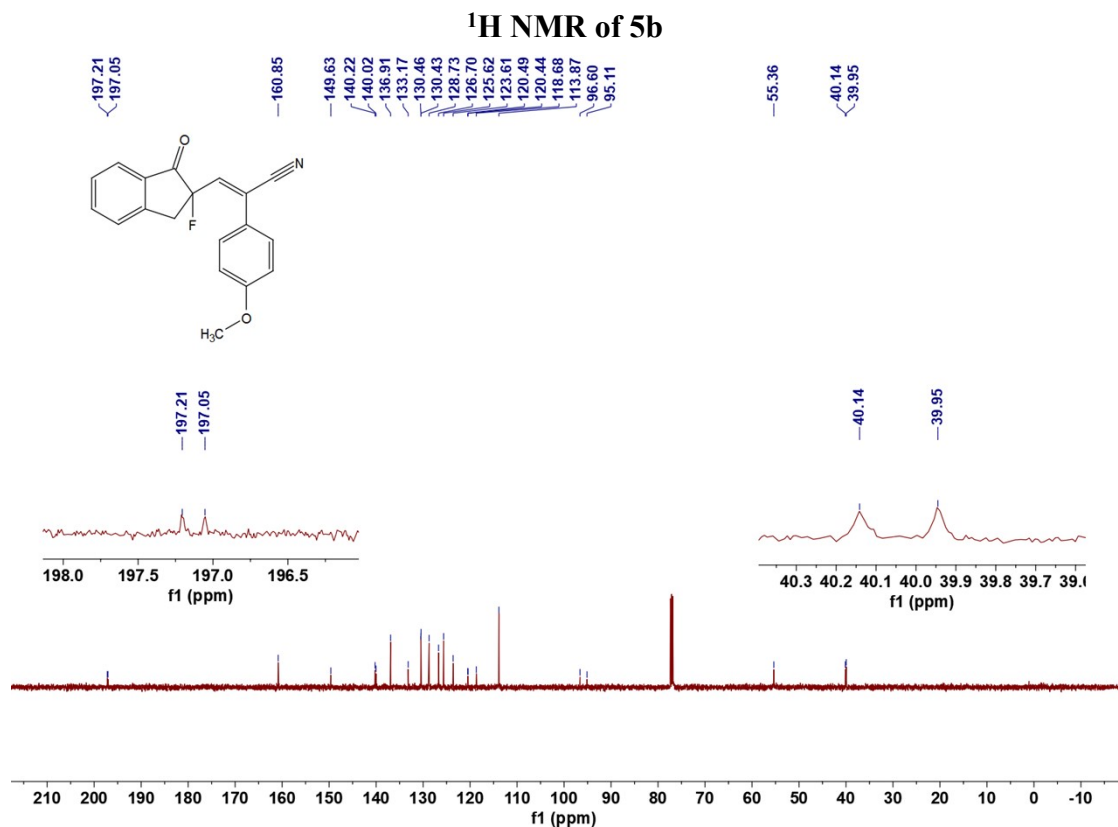

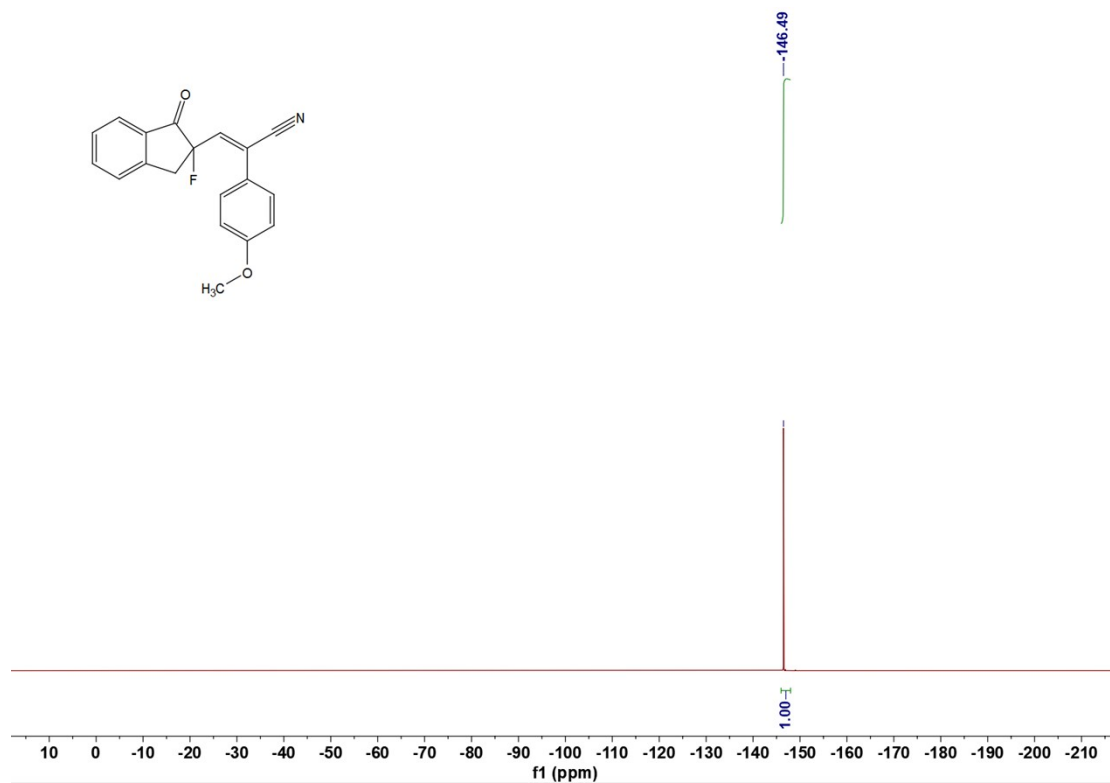

**<sup>19</sup>F NMR of 5b**

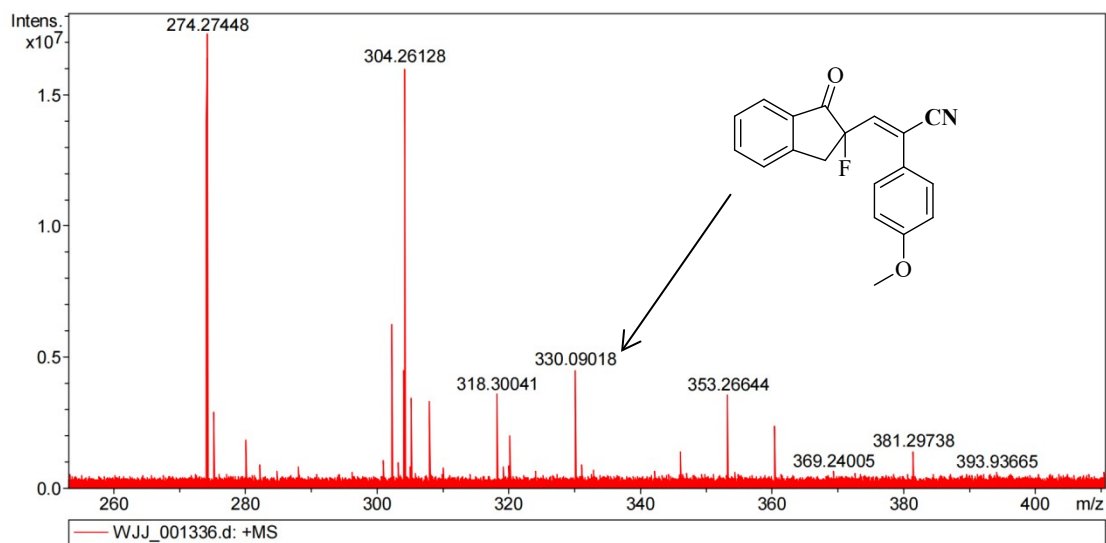

**HRMS of 5b**



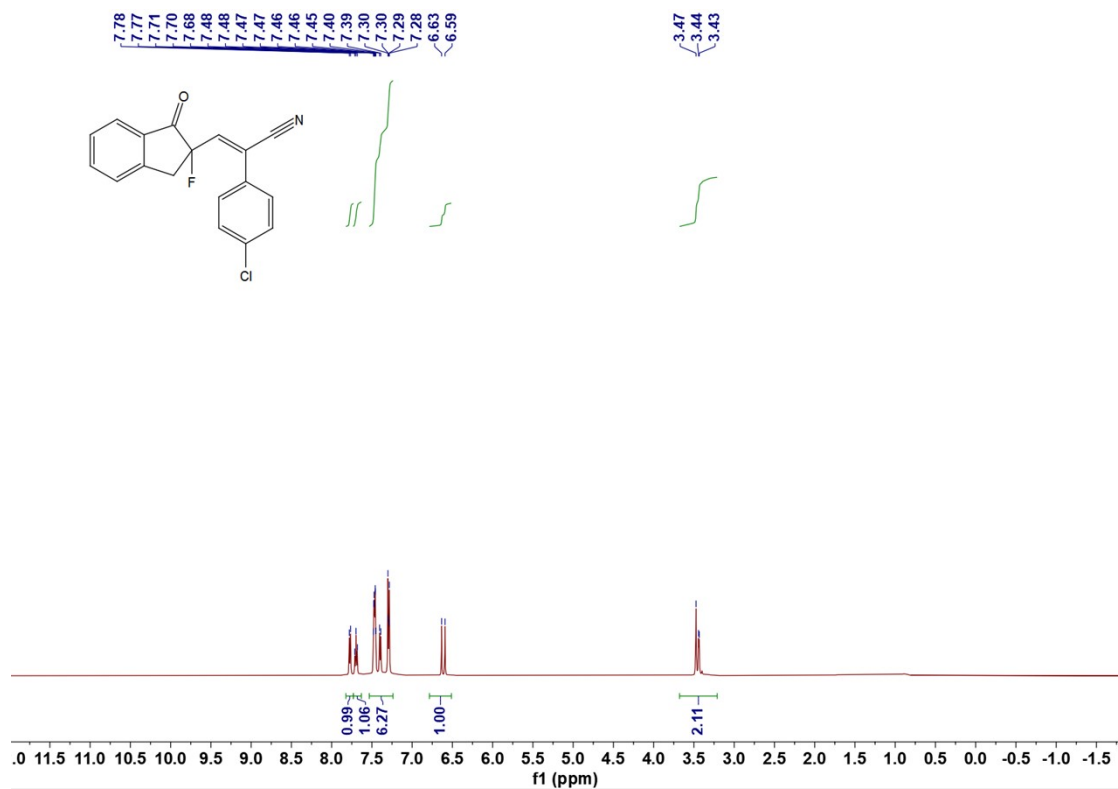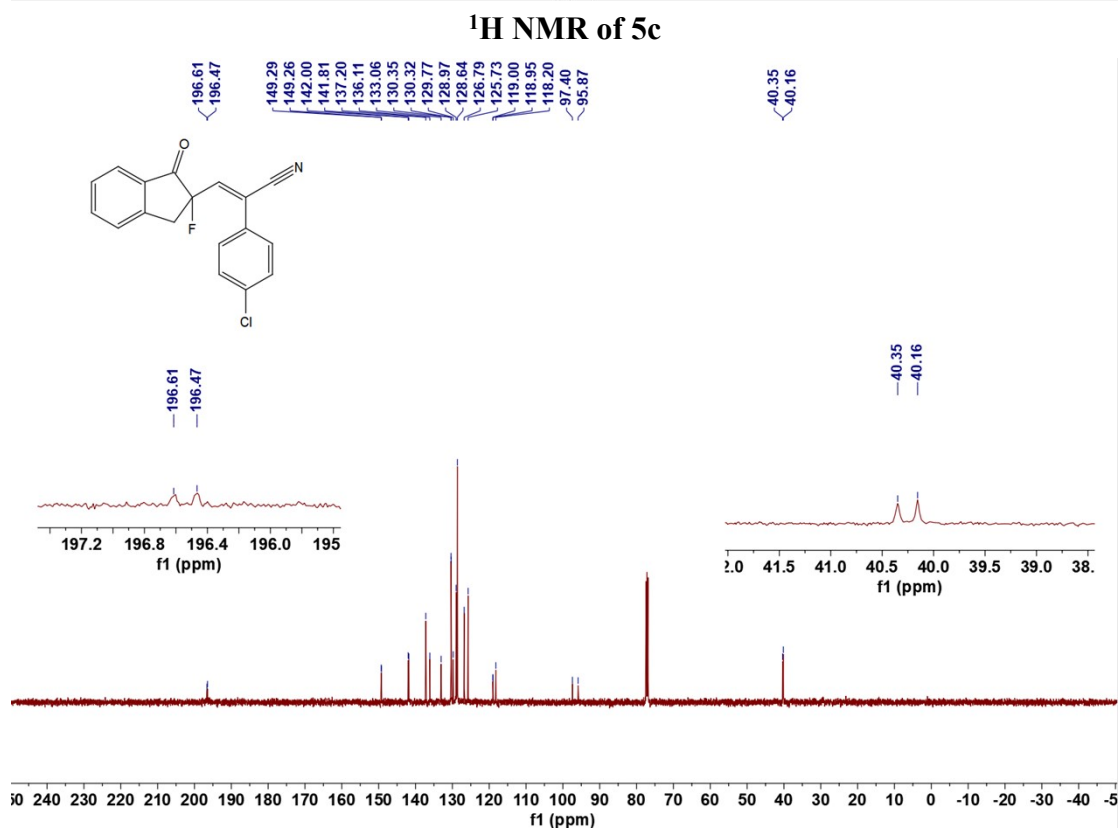

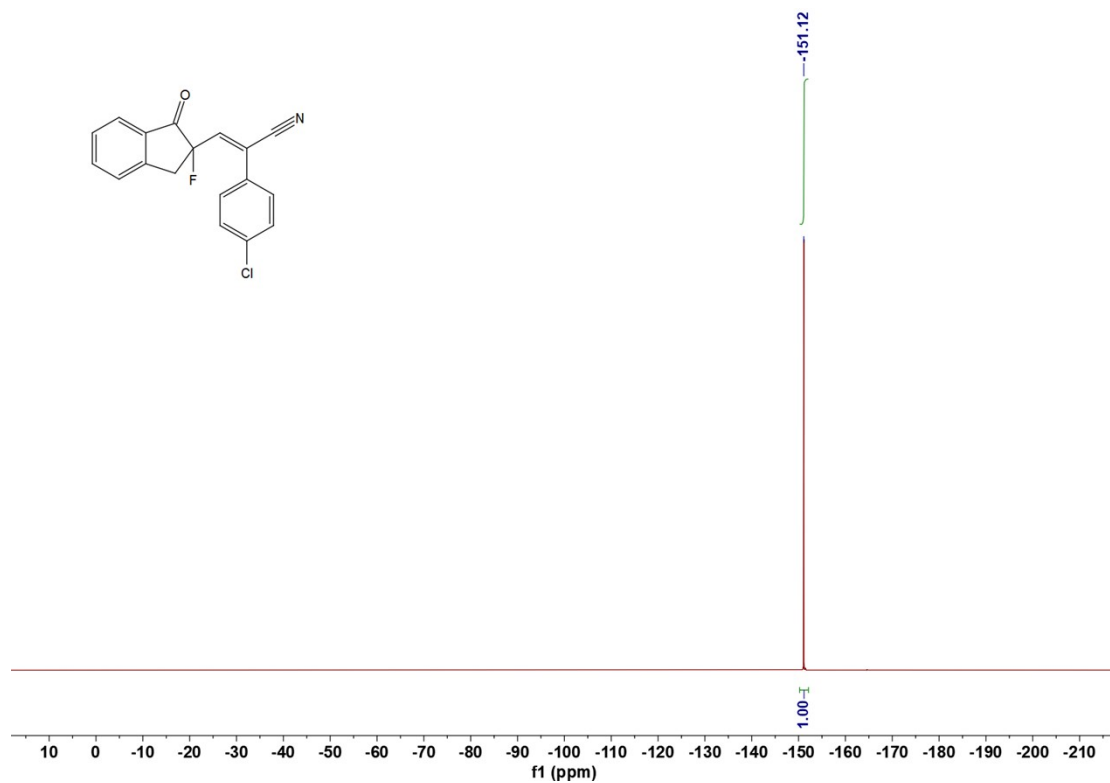

**$^{19}\text{F}$  NMR of 5c**

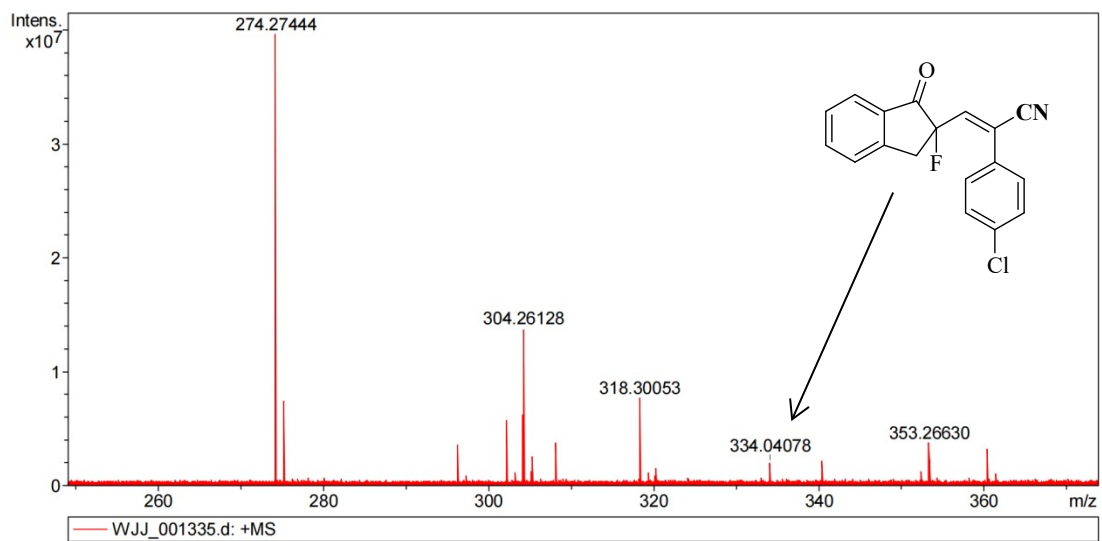

**HRMS of 5c**

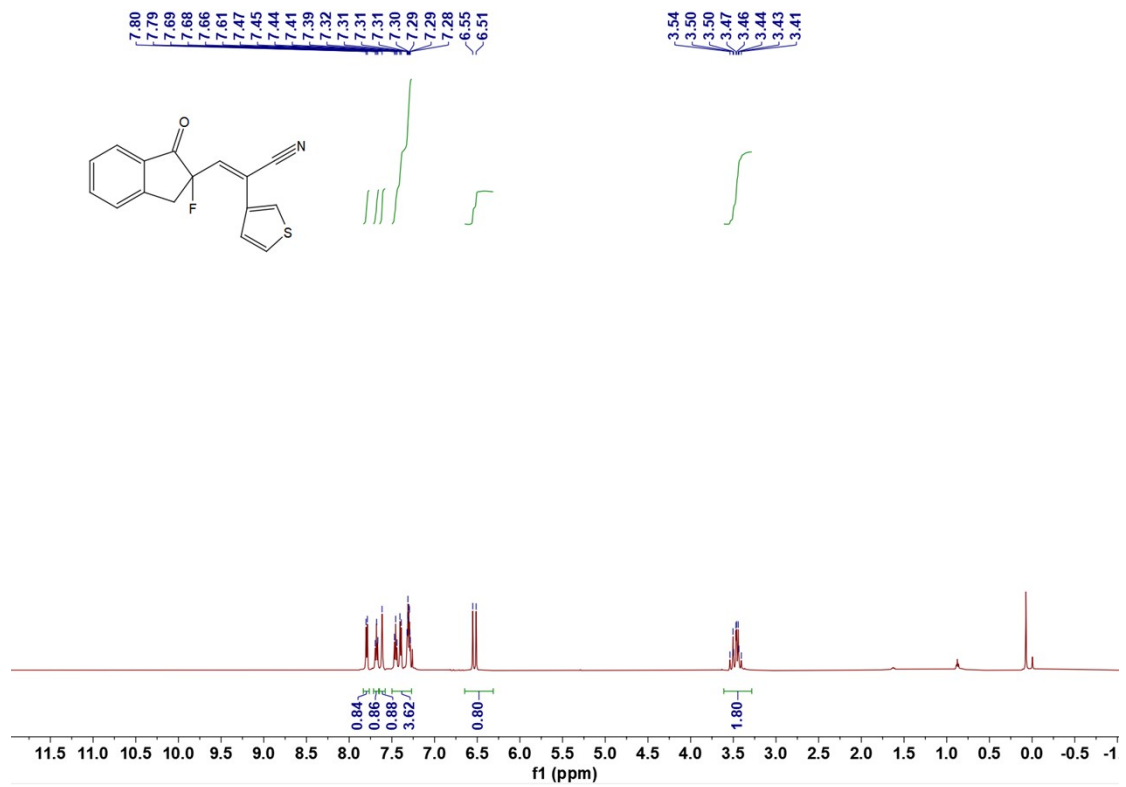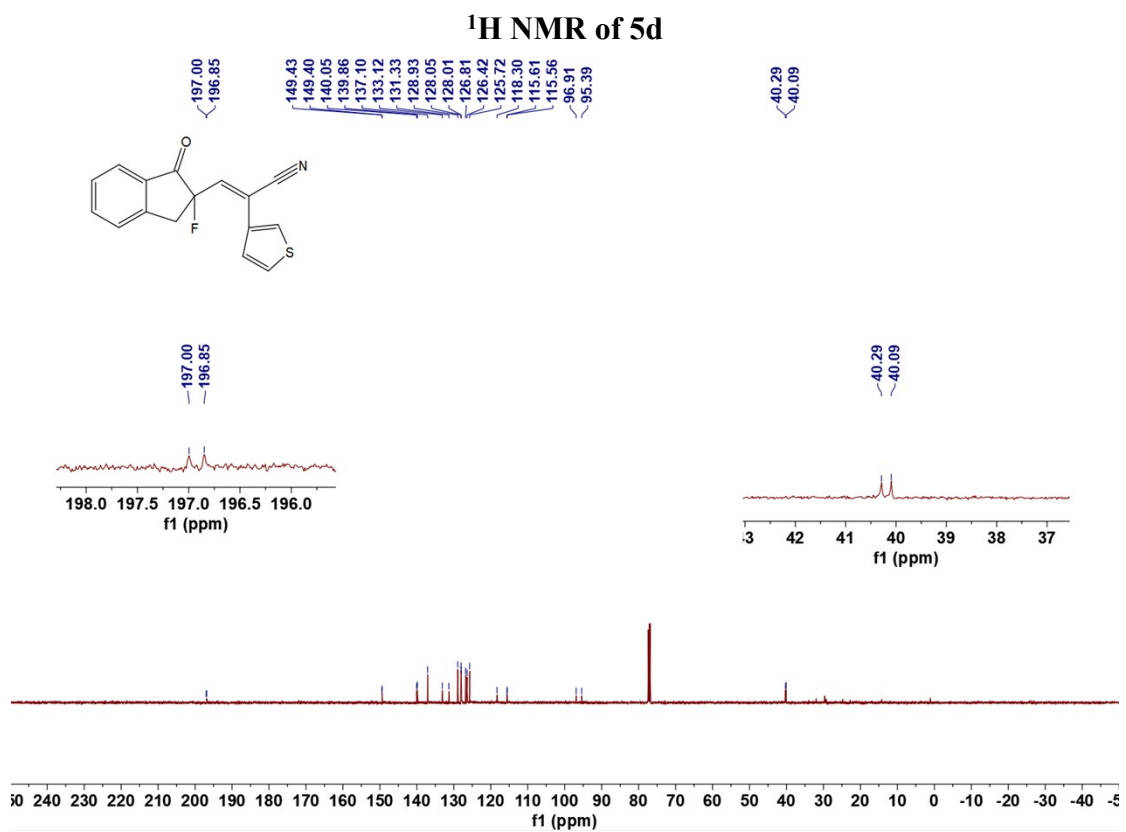

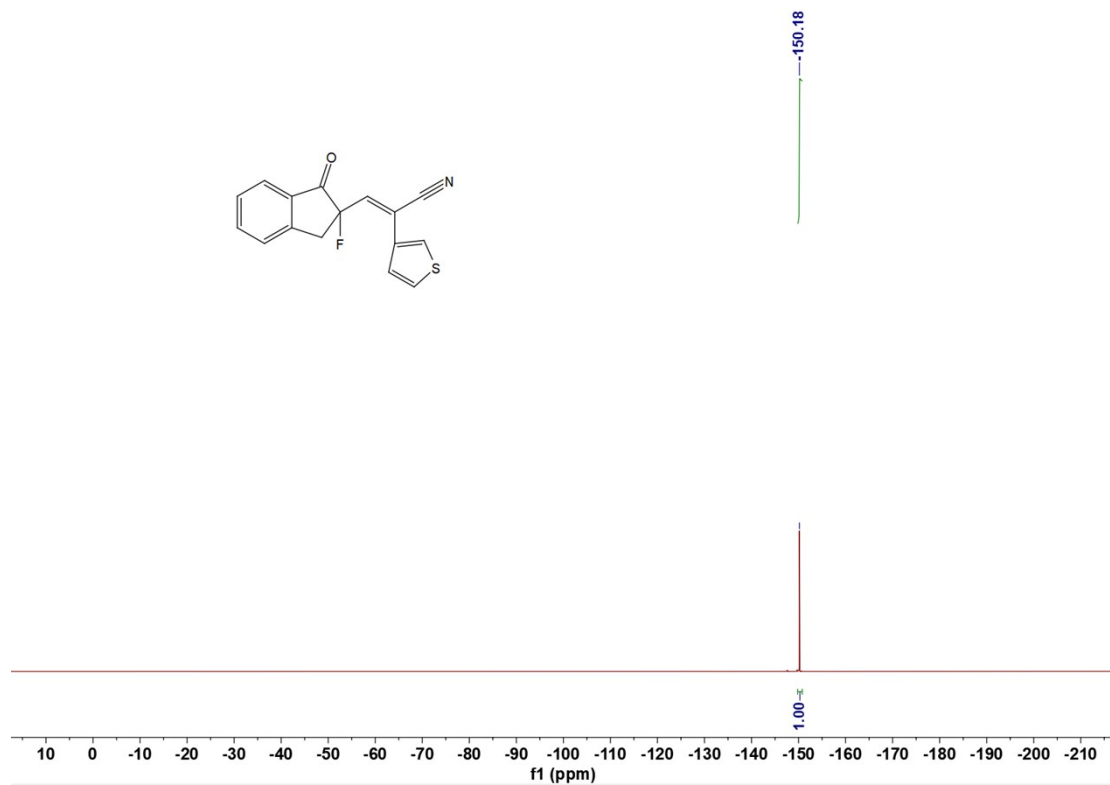

### <sup>19</sup>F NMR of 5d

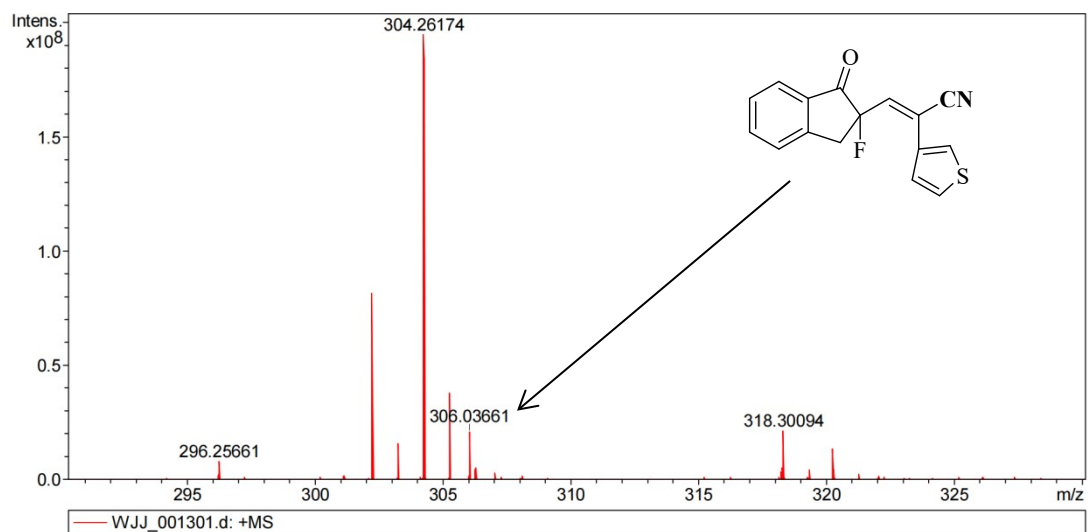

### HRMS of 5d

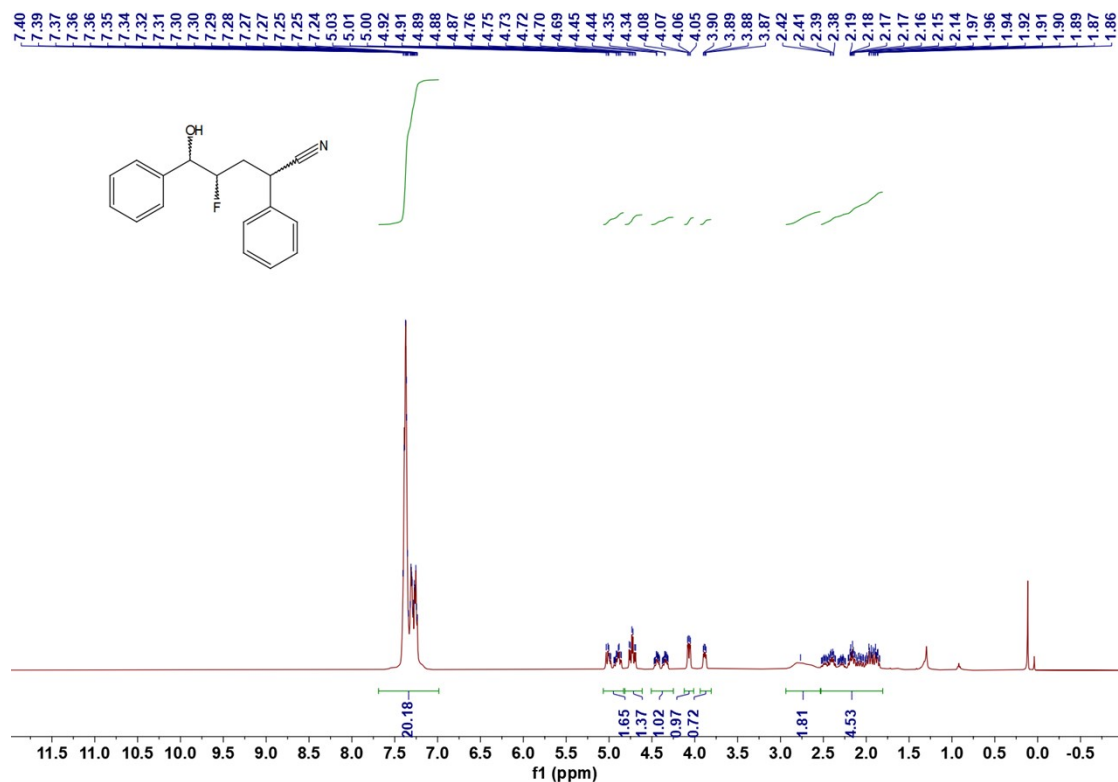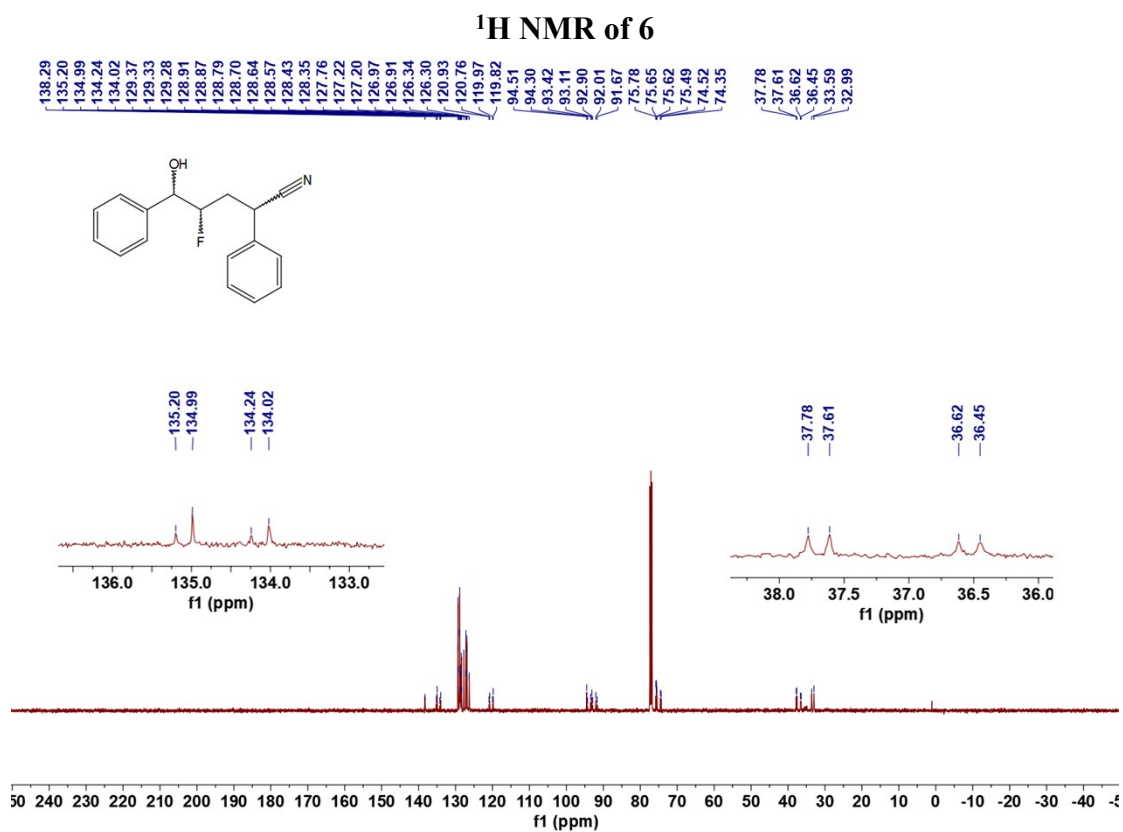

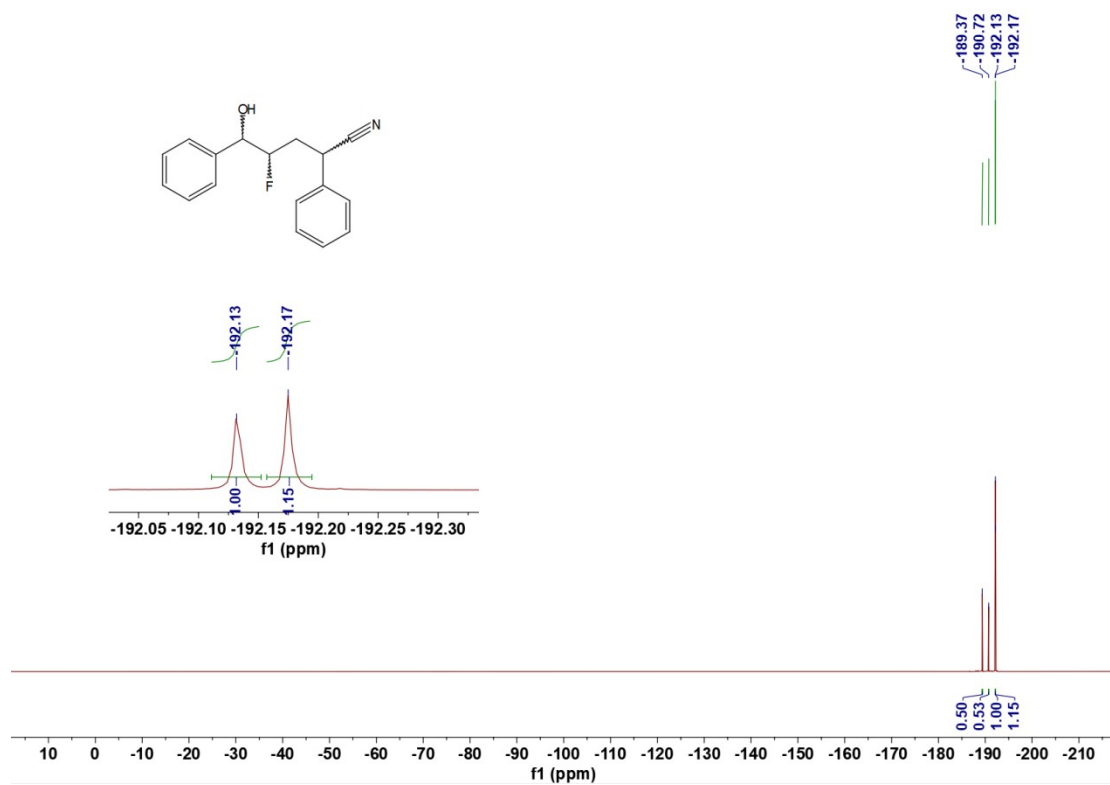

$^{19}\text{F}$  NMR of 6

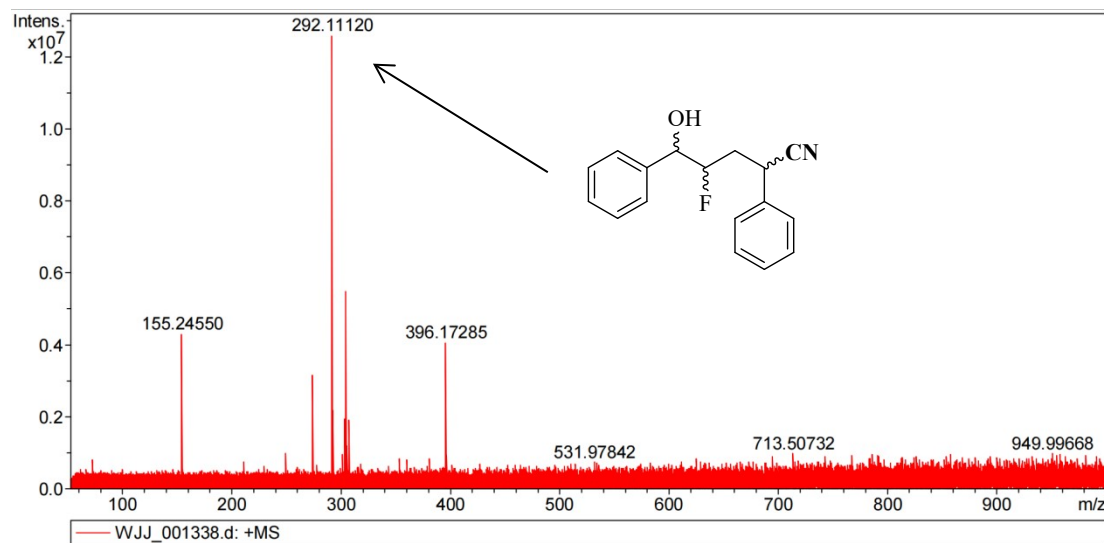

HRMS of 6

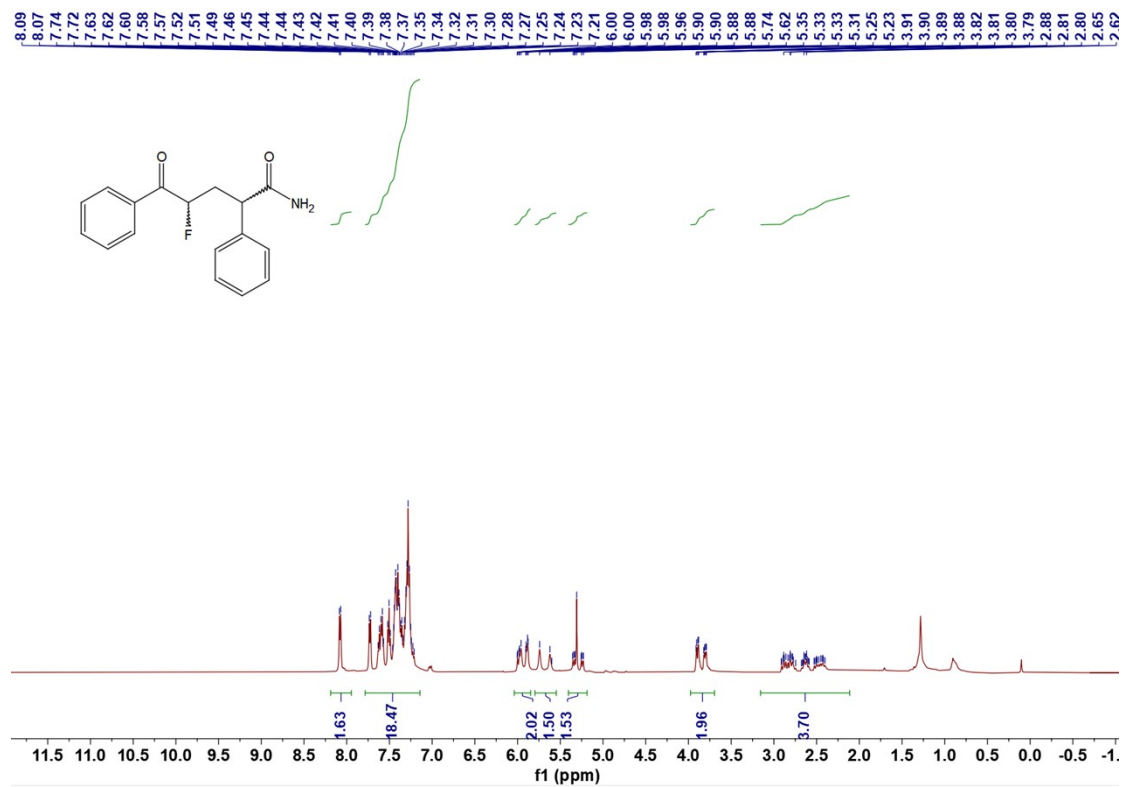

**<sup>1</sup>H NMR of 7**

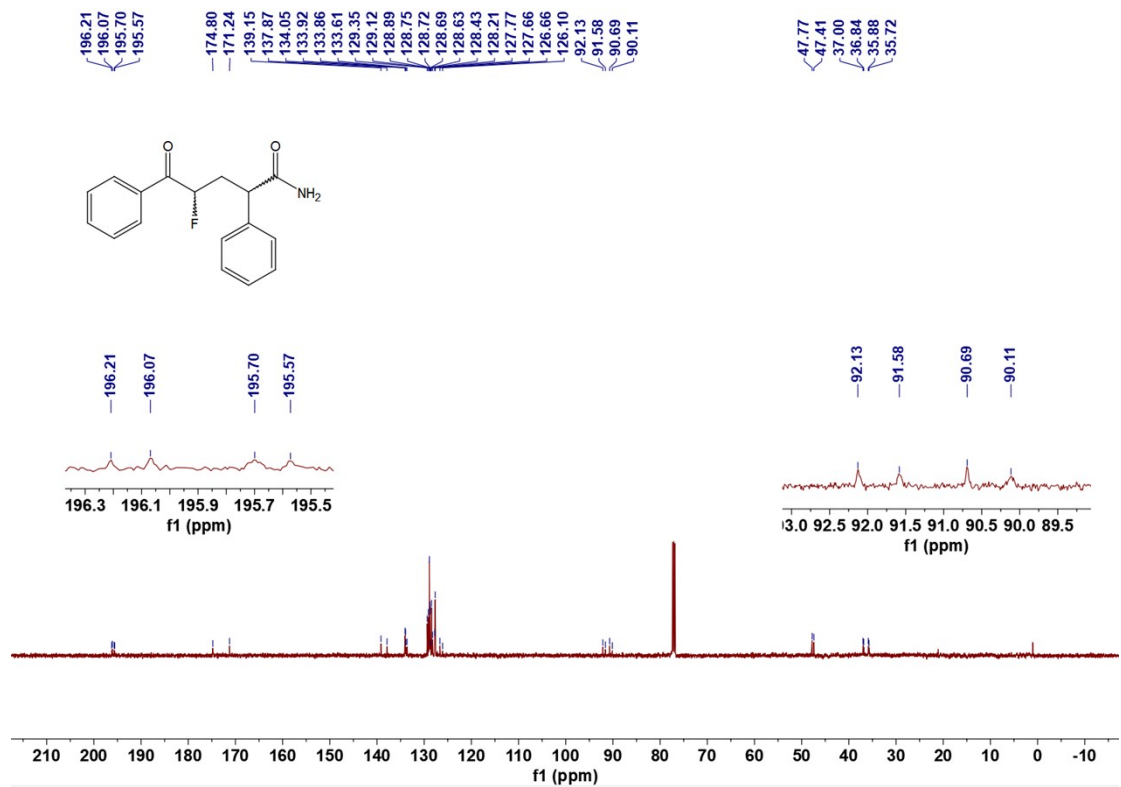

**<sup>13</sup>C NMR of 7**

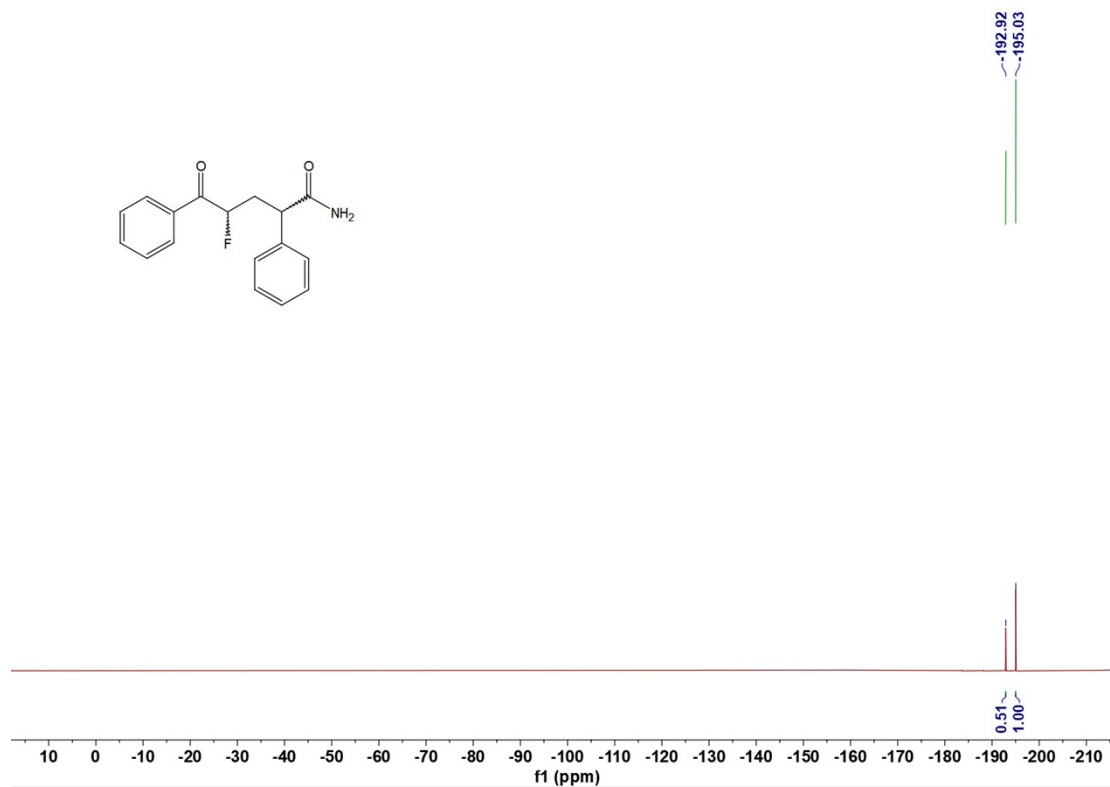

**$^{19}\text{F}$  NMR of 7**

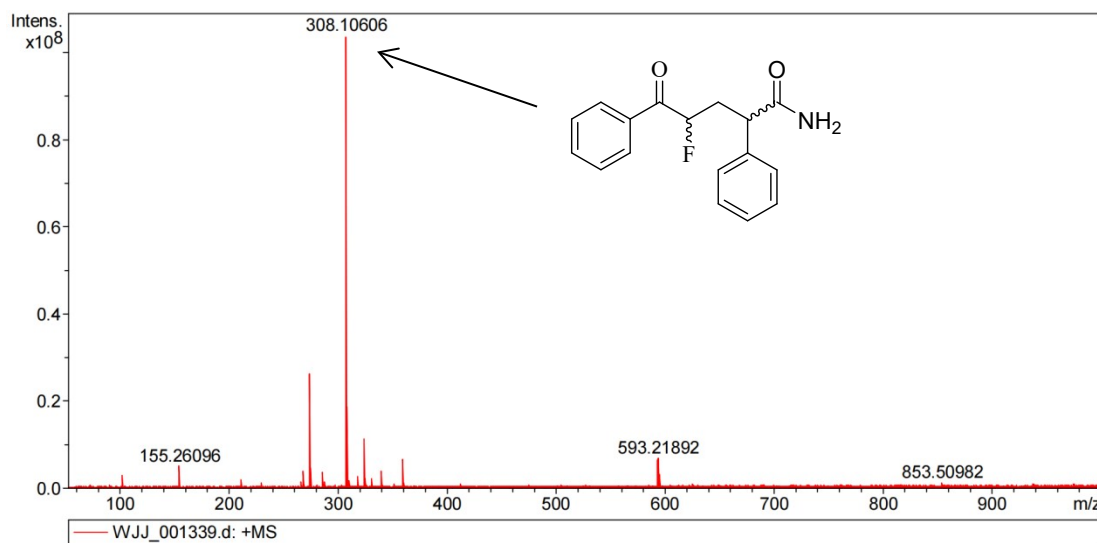

**HRMS of 7**
